# Supplementary material for: Transcriptomic Changes Resulting From STK32B Overexpression Identify Pathways Potentially Relevant to Essential Tremor
Source: PubMed Central journal article supplement (PMC7413243; doi:10.3389/fgene.2020.00813), 2020-07-31
Supplement: Presentation_1.pdf [file Presentation_1.pdf]

## Supplementary Figures

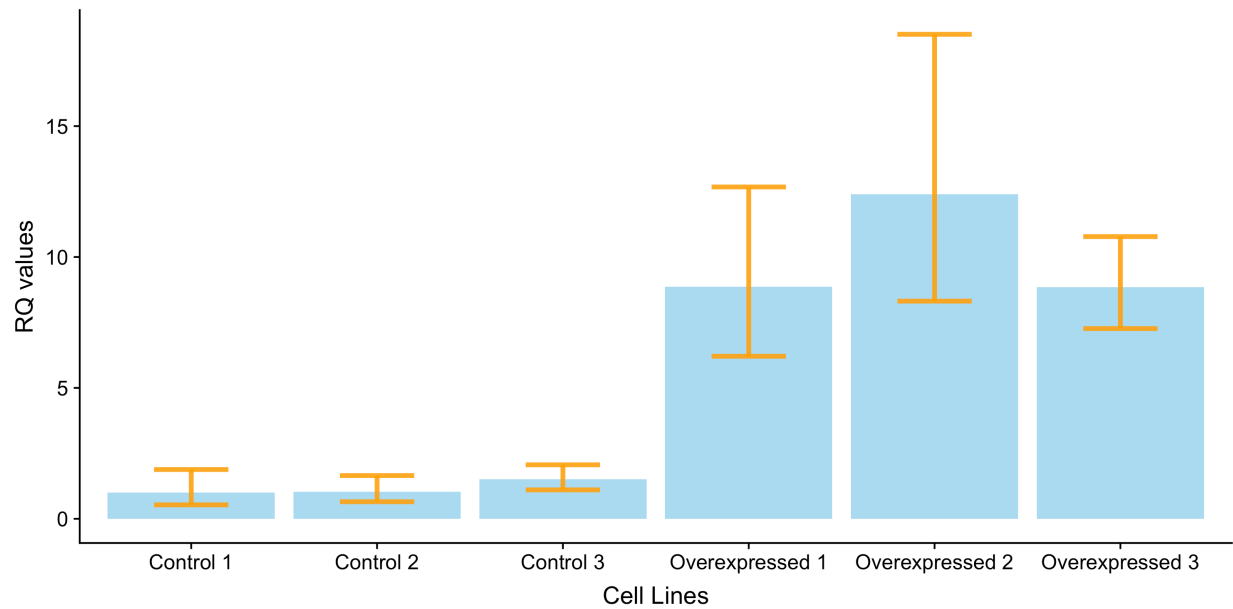

**Supplementary Figure 1. Relative quantification values of RNA sent for sequencing.** Samples were done in quadruplicate. Error bars represent min and max amongst the quadruplicates.

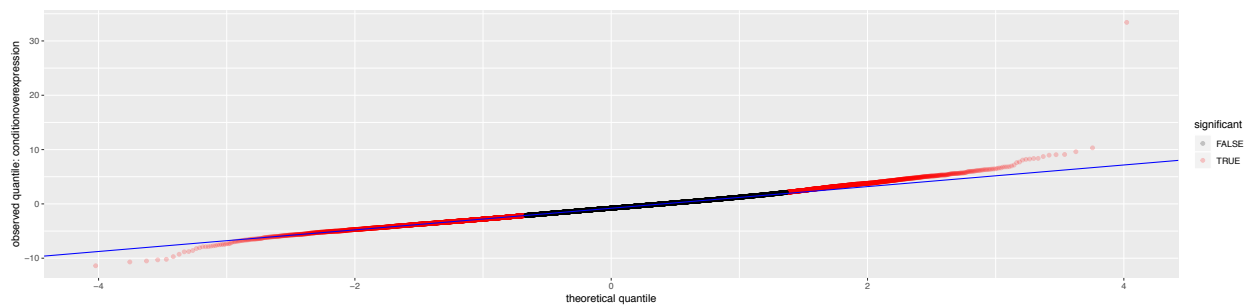

**Supplementary Figure 2. QQ-plot of differentially expressed genes for RNA sequencing data.**

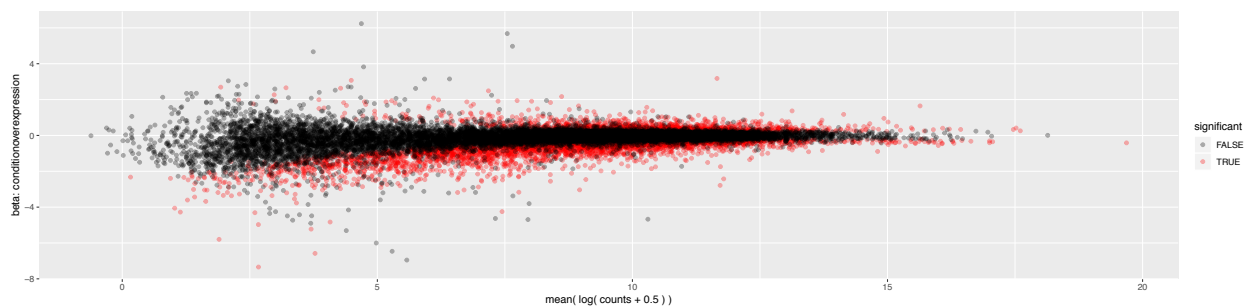

**Supplementary Figure 3. MA-plot of RNA sequencing data.**

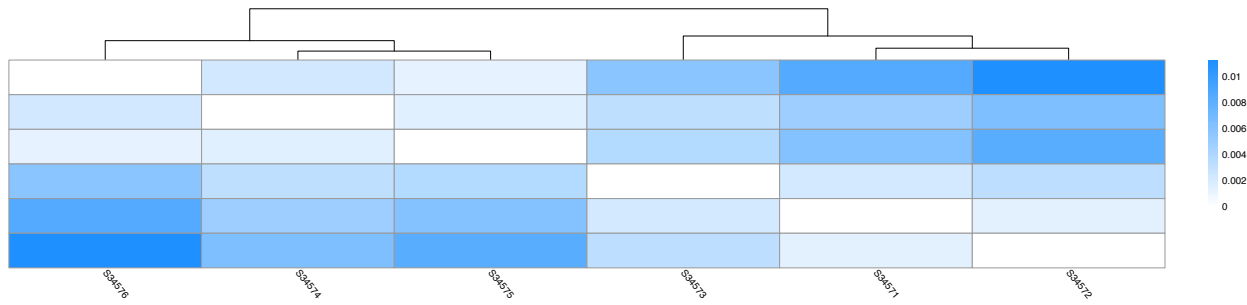

**Supplementary Figure 4. Heatmap of RNA sequencing data for both controls and overexpressed.** S34571, S34572 and S34573 were overexpressed cells. S34574, S34575 and S34576 were controls.

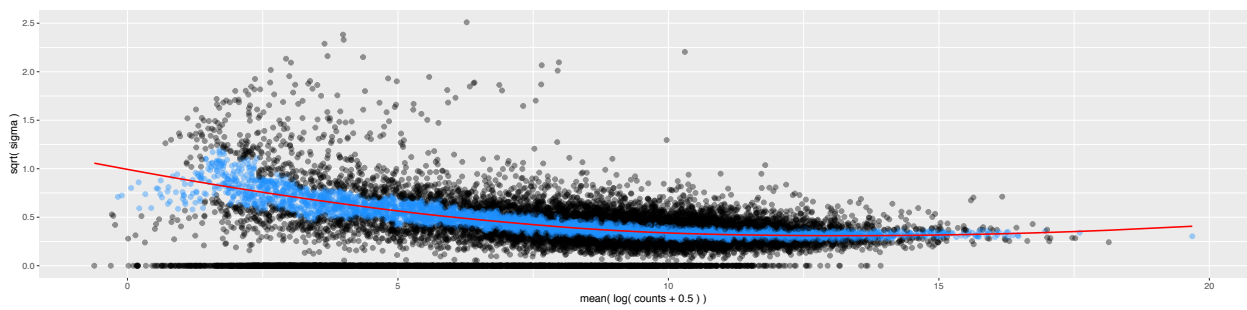

**Supplementary Figure 5. Mean-variance plot of the differentially expressed data.** Data was processed through sleuth for differential expression.
