# Supplementary material for: Transcriptomic Changes Resulting From STK32B Overexpression Identify Pathways Potentially Relevant to Essential Tremor
Source: Front Genet. 2020 Jul 31;11:813. doi: 10.3389/fgene.2020.00813 (PMC7413243; doi:10.3389/fgene.2020.00813)
Supplement: Supplementary file 3 [file Data_Sheet_1.csv]

	target_id	ext_gene	pval	qval	b	se_b	mean_obs	var_obs	tech_var	sigma_sq	smooth_sigma_sq	final_sigma_sq	pval.lrt	qval.lrt
1	ENSG00000152953	STK32B	7.07E-245	1.23E-240	3.179111481	0.095126569	11.65857685	3.04288382	0.001421112	0.012152485	0.009919716	0.012152485	7.22E-09	0.000125427
2	ENSG00000052802	MSMO1	4.78E-30	4.15E-26	-1.083077453	0.09510335	10.35768286	0.362770608	0.001127716	0.012439255	0.012028049	0.012439255	5.32E-06	0.013648942
3	ENSG00000136807	CDK9	1.09E-26	6.32E-23	-1.114482337	0.1042209	9.985898307	0.380955905	0.003210765	0.007207536	0.013082229	0.013082229	3.82E-06	0.013648942
4	ENSG00000079459	FDFT1	7.97E-26	3.46E-22	-1.03509473	0.098509222	11.28413596	0.33307121	0.00394511	0.010610991	0.010329453	0.010610991	8.68E-06	0.013648942
5	ENSG00000114200	BCHE	6.97E-25	2.02E-21	-1.237778148	0.120160421	9.900823901	0.471160492	0.008291481	0.006123605	0.013366309	0.013366309	5.05E-06	0.013648942
6	ENSG00000118523	CTGF	5.81E-25	2.02E-21	0.822526018	0.079713265	12.93045555	0.210589761	0.00028796	0.009243347	0.009225261	0.009243347	9.69E-06	0.013648942
7	ENSG00000162490	DRAXIN	1.93E-24	4.78E-21	-1.15998929	0.11369291	9.281193101	0.413368941	0.003418831	0.008701662	0.015970285	0.015970285	4.95E-06	0.013648942
8	ENSG00000138131	LOXL4	2.72E-22	5.91E-19	-1.583145482	0.163036078	7.715264541	0.773887094	0.010555145	0.016922615	0.029315999	0.029315999	7.59E-06	0.013648942
9	ENSG00000142156	COL6A1	7.73E-22	1.49E-18	0.758966677	0.079030656	13.00778707	0.174890297	0.000155544	0.002445921	0.009213223	0.009213223	3.63E-06	0.013648942
10	ENSG00000145824	CXCL14	1.91E-20	3.31E-17	-2.876604645	0.310400807	6.981300938	2.598074678	0.029125199	0.115397793	0.040770971	0.115397793	1.85E-05	0.01792955
11	ENSG00000113083	LOX	9.23E-20	1.46E-16	0.745715397	0.08196734	12.1954599	0.171968768	0.000568823	0.005857842	0.009509145	0.009509145	1.02E-05	0.013648942
12	ENSG00000159840	ZYX	1.37E-19	1.98E-16	0.764293995	0.084407961	12.35788131	0.178184279	0.001267515	0.002408342	0.009419541	0.009419541	5.94E-06	0.013648942
13	ENSG00000122786	CALD1	3.05E-19	4.07E-16	0.782584876	0.087273666	11.44333714	0.192527984	0.001285159	0.009710163	0.01013988	0.01013988	2.10E-05	0.01792955
14	ENSG00000181577	C6orf223	1.12E-18	1.39E-15	-1.794142732	0.203353125	7.034216985	0.991367992	0.022210615	0.009893822	0.039818126	0.039818126	9.76E-06	0.013648942
15	ENSG00000137968	SLC44A5	1.73E-18	2.00E-15	-1.281928319	0.146108783	8.096764589	0.516157358	0.007230248	0.02171387	0.024791417	0.024791417	2.14E-05	0.01792955
16	ENSG00000274997	HIST1H2AH	2.84E-18	3.09E-15	1.017317171	0.116697473	10.69971679	0.326822228	0.00131127	0.019116181	0.011279612	0.019116181	2.68E-05	0.01792955
17	ENSG00000284967	AC270285.2	9.46E-18	9.67E-15	-0.784818566	0.091467135	11.94587264	0.194821539	0.000740928	0.011808428	0.009677693	0.011808428	2.94E-05	0.01792955
18	ENSG00000058668	ATP2B4	5.34E-17	5.15E-14	0.686565107	0.081939373	12.69599341	0.147020006	0.000788829	0.006221811	0.009282262	0.009282262	1.89E-05	0.01792955
19	ENSG00000188064	WNT7B	6.36E-17	5.81E-14	1.870146671	0.223744818	6.755070984	1.1081432	0.02998734	0.043648445	0.045105276	0.045105276	3.32E-05	0.018578456
20	ENSG00000080573	COL5A3	1.53E-16	1.33E-13	2.085562517	0.252673771	6.101765097	1.381484145	0.031470898	0.064295154	0.060508726	0.064295154	3.71E-05	0.019532752
21	ENSG00000198624	CCDC69	2.10E-16	1.73E-13	-1.460039757	0.177697529	7.626428229	0.673316717	0.016856687	0.025395675	0.030507931	0.030507931	3.10E-05	0.01792955
22	ENSG00000162722	TRIM58	2.32E-16	1.83E-13	1.037263509	0.126426215	10.57568882	0.341954981	0.001593527	0.022381855	0.01153384	0.022381855	3.85E-05	0.019650851
23	ENSG00000142173	COL6A2	6.77E-16	5.11E-13	0.656099153	0.081254123	14.65363722	0.130657193	0.000144922	0.001751782	0.009758427	0.009758427	9.00E-06	0.013648942
24	ENSG00000164211	STARD4	7.15E-16	5.18E-13	-0.838961618	0.103987927	10.32493759	0.224133166	0.00133052	0.014889714	0.012108876	0.014889714	4.25E-05	0.019959112
25	ENSG00000110921	MVK	3.18E-15	2.15E-12	-0.779420097	0.098863232	10.66503832	0.191169798	0.003311774	0.007839591	0.011349134	0.011349134	3.08E-05	0.01792955
26	ENSG00000177000	MTHFR	3.22E-15	2.15E-12	-1.090569558	0.138363577	9.486477265	0.372960949	0.013728065	0.006469886	0.014988654	0.014988654	2.77E-05	0.01792955
27	ENSG00000168824	NSG1	3.66E-15	2.35E-12	-1.837454516	0.233591272	6.984757503	1.049495703	0.041139267	0.0046407	0.040708057	0.040708057	2.13E-05	0.01792955
28	ENSG00000103485	QPRT	7.33E-15	4.54E-12	-1.994452282	0.25639795	7.079756337	1.262441661	0.059594427	0.026767684	0.039015436	0.039015436	4.17E-05	0.019959112
29	ENSG00000101384	JAG1	1.22E-14	7.16E-12	1.252208051	0.162327025	7.372426224	0.490064116	0.005315611	0.019255157	0.034209483	0.034209483	2.70E-05	0.01792955
30	ENSG00000149485	FADS1	1.24E-14	7.16E-12	-0.995908587	0.129135199	10.21707786	0.317561254	0.004097287	0.020916562	0.012389917	0.020916562	5.56E-05	0.020744939
31	ENSG00000168874	ATOH8	1.49E-14	8.34E-12	-0.71357753	0.092810015	10.63414017	0.158612611	0.001508499	0.005809931	0.011412049	0.011412049	2.48E-05	0.01792955
32	ENSG00000002834	LASP1	2.90E-14	1.57E-11	0.628526653	0.082669234	11.57955954	0.123402261	0.000255169	0.0058555	0.009996134	0.009996134	2.81E-05	0.01792955
33	ENSG00000154274	C4orf19	4.60E-14	2.42E-11	-0.999133817	0.132462536	9.591416325	0.320536104	0.002548087	0.023771398	0.01453602	0.023771398	6.34E-05	0.020744939
34	ENSG00000164742	ADCY1	5.09E-14	2.60E-11	-1.998954627	0.265478819	6.239755075	1.278758509	0.048878477	0.051137309	0.056840028	0.056840028	5.78E-05	0.020744939
35	ENSG00000169169	CPT1C	7.64E-14	3.79E-11	-1.203811107	0.161016545	7.935448479	0.448800643	0.012301028	0.005264332	0.026588463	0.026588463	2.37E-05	0.01792955
36	ENSG00000117600	PLPPR4	9.06E-14	4.37E-11	-1.527643993	0.204946057	6.957813773	0.7411256	0.021803325	0.029467611	0.041201004	0.041201004	4.78E-05	0.020744939
37	ENSG00000171724	VAT1L	1.06E-13	4.98E-11	-0.83613515	0.112486909	9.175243904	0.219807103	0.002454592	0.01013354	0.016525365	0.016525365	3.65E-05	0.019532752
38	ENSG00000119630	PGF	2.19E-13	1.00E-10	-0.987238765	0.134566881	8.834410592	0.314122008	0.004111672	0.023050696	0.018556585	0.023050696	7.47E-05	0.020744939
39	ENSG00000112972	HMGCS1	2.41E-13	1.08E-10	-0.804030723	0.109786843	9.507925598	0.201198755	0.003186145	0.005887773	0.014893581	0.014893581	2.95E-05	0.01792955
40	ENSG00000113328	CCNG1	2.81E-13	1.22E-10	-0.651098855	0.089155239	11.39212527	0.136717304	0.000709063	0.011213922	0.010198184	0.011213922	7.68E-05	0.020744939
41	ENSG00000092853	CLSPN	8.90E-13	3.77E-10	0.642669084	0.089928381	12.47118638	0.126674823	0.002764473	0.000695224	0.009366197	0.009366197	2.29E-05	0.01792955
42	ENSG00000173918	C1QTNF1	1.23E-12	5.09E-10	-0.801308378	0.112832387	10.1153478	0.202761639	0.006418228	0.006248152	0.012678493	0.012678493	4.81E-05	0.020744939
43	ENSG00000100678	SLC8A3	2.77E-12	1.12E-09	-1.39405617	0.199464569	7.205052263	0.630761119	0.020250699	0.039428472	0.036886043	0.039428472	9.94E-05	0.020744939
44	ENSG00000167767	KRT80	2.93E-12	1.15E-09	0.790481991	0.113232759	9.570424543	0.202844523	0.002739444	0.016493042	0.014624088	0.016493042	0.000100089	0.020744939
45	ENSG00000244270	RPL32P29	2.99E-12	1.15E-09	-1.864509379	0.267191862	7.359263495	1.128588356	0.018969984	0.088117253	0.03441317	0.088117253	0.000100331	0.020744939
46	ENSG00000077092	RARB	4.32E-12	1.63E-09	-1.255719839	0.18129739	7.350635523	0.500878235	0.014755799	0.020029877	0.034547316	0.034547316	6.05E-05	0.020744939
47	ENSG00000088882	CPXM1	6.04E-12	2.23E-09	-1.492008629	0.216899906	9.345349981	0.724281607	0.003713538	0.066854816	0.015649299	0.066854816	0.000109142	0.020744939
48	ENSG00000123364	HOXC13	7.10E-12	2.57E-09	-0.815435631	0.118942268	9.063859497	0.21553283	0.004075683	0.01598963	0.017145212	0.017145212	0.000100538	0.020744939
49	ENSG00000091127	PUS7	7.56E-12	2.68E-09	0.595698799	0.087004988	11.28559549	0.114459858	0.001027201	0.008976224	0.0103276	0.0103276	8.98E-05	0.020744939
50	ENSG00000138944	SHISAL1	9.03E-12	3.14E-09	0.639441972	0.09374353	10.51924609	0.128729858	0.00152649	0.00605357	0.011655284	0.011655284	5.20E-05	0.020744939
51	ENSG00000019505	SYT13	9.65E-12	3.29E-09	-1.670338412	0.24521712	7.574232177	0.909166846	0.057078694	0.033118459	0.03123302	0.033118459	0.000115597	0.020744939
52	ENSG00000101871	MID1	1.02E-11	3.42E-09	0.564643357	0.082997493	13.346063	0.103563542	0.001133161	0.008762971	0.009199715	0.009199715	0.000107614	0.020744939
53	ENSG00000162595	DIRAS3	1.27E-11	4.17E-09	0.990616373	0.14628504	10.51747952	0.320075415	0.001817222	0.030281747	0.011659151	0.030281747	0.000119637	0.020744939
54	ENSG00000056998	GYG2	1.43E-11	4.51E-09	-1.641149665	0.242951981	6.886701505	0.856256628	0.046008041	0.01429816	0.042530456	0.042530456	6.71E-05	0.020744939
55	ENSG00000119711	ALDH6A1	1.42E-11	4.51E-09	-1.057572312	0.156534419	9.671976179	0.364941388	0.002748478	0.034006059	0.014208968	0.034006059	0.000121269	0.020744939
56	ENSG00000074211	PPP2R2C	1.89E-11	5.86E-09	-1.732697305	0.258061802	6.534837745	0.980587058	0.036081729	0.063812111	0.049774199	0.063812111	0.000125762	0.020744939
57	ENSG00000158769	F11R	2.51E-11	7.65E-09	-1.30981023	0.196290815	9.387407788	0.560916953	0.015838987	0.041956139	0.015445837	0.041956139	0.000130399	0.020744939
58	ENSG00000198417	MT1F	2.79E-11	8.35E-09	-2.057520206	0.3090617	5.525321108	1.38463978	0.058575972	0.08470273	0.078952232	0.08470273	0.000132182	0.020744939
59	ENSG00000100439	ABHD4	2.91E-11	8.56E-09	-0.876330833	0.131754581	8.493751986	0.251217842	0.004422492	0.021616413	0.02106251	0.021616413	0.000132888	0.020744939
60	ENSG00000005882	PDK2	3.55E-11	1.03E-08	-1.038959	0.156896558	8.014963713	0.35314097	0.011243088	0.025394699	0.025681707	0.025681707	0.000134404	0.020744939
61	ENSG00000049130	KITLG	3.79E-11	1.05E-08	0.606618597	0.091744791	10.84919298	0.113830295	0.001632192	0.002660881	0.010993468	0.010993468	4.08E-05	0.019959112
62	ENSG00000165271	NOL6	3.78E-11	1.05E-08	0.787279246	0.11906166	12.41744943	0.202953398	0.000772121	0.020491398	0.009390566	0.020491398	0.000137514	0.020744939
63	ENSG00000166426	CRABP1	3.80E-11	1.05E-08	-2.417632387	0.365669859	4.636021078	1.913941243	0.057649517	0.142922151	0.121119859	0.142922151	0.000137617	0.020744939
64	ENSG00000073670	ADAM11	5.81E-11	1.58E-08	-1.735984621	0.265091609	7.133186371	0.960386338	0.067316856	0.003050089	0.038093486	0.038093486	7.88E-05	0.020744939
65	ENSG00000116991	SIPA1L2	6.14E-11	1.64E-08	0.552666746	0.084500439	11.58068455	0.091816326	0.000715474	-0.000485266	0.009995012	0.009995012	2.45E-05	0.01792955
66	ENSG00000142765	SYTL1	6.92E-11	1.82E-08	-1.356246259	0.20793545	8.314813529	0.603705757	0.021353329	0.043502398	0.022624279	0.043502398	0.000148942	0.020744939
67	ENSG00000223654	FLOT1	7.07E-11	1.83E-08	-0.664323854	0.101904603	11.1142912	0.140890322	0.00501582	0.005599763	0.010561002	0.010561002	8.31E-05	0.020744939
68	ENSG00000129538	RNASE1	8.41E-11	2.15E-08	-1.308457668	0.201516667	8.098555393	0.562349201	0.014588538	0.046324913	0.024772404	0.046324913	0.000152911	0.020744939
69	ENSG00000234745	HLA-B	8.75E-11	2.20E-08	-0.592162903	0.091282404	12.76068815	0.114747927	0.003235276	0.008703294	0.00926344	0.00926344	0.00014151	0.020744939
70	ENSG00000135363	LMO2	8.94E-11	2.22E-08	-1.594456337	0.24591314	6.38439718	0.821718436	0.037458374	0.036330543	0.053251534	0.053251534	0.000109318	0.020744939
71	ENSG00000109255	NMU	9.17E-11	2.24E-08	-1.291219777	0.199261228	6.900688529	0.539970349	0.017291901	0.032452844	0.042265655	0.042265655	0.000114179	0.020744939
72	ENSG00000137877	SPTBN5	1.11E-10	2.68E-08	1.635967926	0.253599825	6.835935552	0.867120572	0.052963786	0.027290283	0.04350552	0.04350552	0.000116527	0.020744939
73	ENSG00000028137	TNFRSF1B	1.13E-10	2.68E-08	-0.870911531	0.135050099	8.306261096	0.243769699	0.004654054	0.015625483	0.02270374	0.02270374	9.89E-05	0.020744939
74	ENSG00000133816	MICAL2	1.17E-10	2.74E-08	0.671369755	0.104188375	10.87690374	0.148247465	0.00085572	0.015427107	0.01094376	0.015427107	0.000159837	0.020744939
75	ENSG00000155962	CLIC2	1.23E-10	2.85E-08	-1.159006721	0.180102393	7.805742162	0.43437958	0.020498975	0.018739283	0.028156332	0.028156332	0.000112816	0.020744939
76	ENSG00000166265	CYYR1	1.32E-10	3.03E-08	-1.8959551	0.295120261	5.863560664	1.158081808	0.063173063	0.036437045	0.06747089	0.06747089	0.00010512	0.020744939
77	ENSG00000152104	PTPN14	1.38E-10	3.11E-08	0.584844963	0.091121164	12.21286923	0.10680163	0.002955808	0.002279868	0.009498792	0.009498792	5.66E-05	0.020744939
78	ENSG00000165716	FAM69B	1.56E-10	3.47E-08	-0.7986864	0.124800781	10.34114754	0.210060272	0.002067161	0.021295692	0.012068619	0.021295692	0.000166349	0.020744939
79	ENSG00000067064	IDI1	1.60E-10	3.51E-08	-0.713198321	0.111508114	11.09251272	0.167516425	0.000920908	0.017730181	0.0105931	0.017730181	0.000166918	0.020744939
80	ENSG00000269343	ZNF587B	1.66E-10	3.60E-08	0.685995296	0.107354456	9.646789971	0.148161346	0.002978075	0.005752528	0.014309394	0.014309394	6.79E-05	0.020744939
81	ENSG00000139625	MAP3K12	1.86E-10	3.99E-08	-1.070530001	0.16799414	7.579663914	0.354733061	0.011176339	0.002477056	0.031156708	0.031156708	4.96E-05	0.020744939
82	ENSG00000092096	SLC22A17	2.06E-10	4.36E-08	-1.359459412	0.213857998	9.904943304	0.609321259	0.004340479	0.064262386	0.013352213	0.064262386	0.000172969	0.020744939
83	ENSG00000104870	FCGRT	2.18E-10	4.54E-08	-1.671125194	0.263244394	9.073214161	0.920954957	0.009851544	0.094094872	0.017091629	0.094094872	0.000174341	0.020744939
84	ENSG00000239306	RBM14	2.20E-10	4.54E-08	0.628947154	0.099094014	9.857257135	0.128549214	0.001211846	0.011134227	0.01351759	0.01351759	0.000129708	0.020744939
85	ENSG00000099250	NRP1	2.38E-10	4.87E-08	0.645019001	0.101829398	12.6887317	0.137257925	0.002235071	0.013318768	0.009284523	0.013318768	0.000176569	0.020744939
86	ENSG00000139364	TMEM132B	2.70E-10	5.46E-08	-2.153311459	0.34098498	6.967362089	1.517761035	0.133380487	0.025039466	0.041025647	0.041025647	0.000151919	0.020744939
87	ENSG00000159399	HK2	2.87E-10	5.73E-08	0.635510551	0.100784083	10.52022831	0.131711635	0.003583011	0.00960391	0.011653136	0.011653136	0.000141681	0.020744939
88	ENSG00000120800	UTP20	2.93E-10	5.79E-08	0.630280556	0.100006589	9.609538397	0.126139679	0.000541023	0.008163484	0.014460954	0.014460954	8.45E-05	0.020744939
89	ENSG00000112658	SRF	3.06E-10	5.96E-08	0.529589374	0.084116191	11.64776835	0.086648306	0.000683414	0.002452629	0.009929886	0.009929886	5.08E-05	0.020744939
90	ENSG00000164039	BDH2	4.24E-10	8.19E-08	-0.918038517	0.147008742	7.949124757	0.2787723	0.00465514	0.027762216	0.02642958	0.027762216	0.000191754	0.020744939
91	ENSG00000176692	FOXC2	4.47E-10	8.54E-08	1.06918557	0.171439846	8.252967142	0.37821728	0.007586863	0.036500568	0.023208979	0.036500568	0.000193233	0.020744939
92	ENSG00000183688	RFLNB	4.92E-10	9.29E-08	0.854179156	0.137290444	12.20964543	0.241505008	0.000443599	0.0278294	0.009500695	0.0278294	0.000195911	0.020744939
93	ENSG00000128045	RASL11B	5.36E-10	1.00E-07	-1.736863968	0.27977447	7.246624374	0.998937438	0.019654351	0.097756279	0.036203771	0.097756279	0.000198409	0.020744939
94	ENSG00000185432	METTL7A	5.43E-10	1.00E-07	-2.504405187	0.403535427	7.038400648	2.077022611	0.057411986	0.186849275	0.039743722	0.186849275	0.000198766	0.020744939
95	ENSG00000137880	GCHFR	5.63E-10	1.03E-07	-1.122169272	0.18098138	7.241935594	0.417084275	0.011895217	0.037236173	0.036280147	0.037236173	0.000199824	0.020744939
96	ENSG00000144583	04-Mar	6.48E-10	1.17E-07	1.940258691	0.314045374	7.740258781	1.247730533	0.012225319	0.135711427	0.028990184	0.135711427	0.00020401	0.020744939
97	ENSG00000170801	HTRA3	6.56E-10	1.17E-07	-1.068400893	0.172981584	7.478418497	0.358310102	0.01227205	0.007560401	0.032611892	0.032611892	7.44E-05	0.020744939
98	ENSG00000112559	MDFI	6.79E-10	1.20E-07	-1.089469038	0.176549447	10.33460697	0.393486484	0.002489165	0.044265396	0.012084804	0.044265396	0.000205424	0.020744939
99	ENSG00000070756	PABPC1	7.49E-10	1.31E-07	0.729867014	0.118574278	12.0850167	0.176683589	0.001799678	0.019290111	0.009579057	0.019290111	0.00020844	0.020744939
100	ENSG00000121898	CPXM2	7.70E-10	1.34E-07	-0.890421054	0.144759371	9.22698994	0.263001227	0.003013309	0.028419604	0.016250266	0.028419604	0.000209286	0.020744939
101	ENSG00000113621	TXNDC15	8.12E-10	1.40E-07	-0.722182313	0.117570836	9.985271763	0.17305167	0.007222758	0.013511595	0.013084268	0.013511595	0.000210967	0.020744939
102	ENSG00000184117	NIPSNAP1	8.61E-10	1.46E-07	-0.594989287	0.097011728	10.25036264	0.117497206	0.000491087	0.013625826	0.012300631	0.013625826	0.000212834	0.020744939
103	ENSG00000264230	ANXA8L1	8.65E-10	1.46E-07	1.985313868	0.323731432	6.199533555	1.308203795	0.067951113	0.089251947	0.057883693	0.089251947	0.000212949	0.020744939
104	ENSG00000070814	TCOF1	9.05E-10	1.51E-07	0.511692167	0.083536556	13.70588838	0.08584076	0.001212215	0.007902908	0.00925532	0.00925532	0.000169508	0.020744939
105	ENSG00000108984	MAP2K6	9.96E-10	1.65E-07	-1.566121508	0.256321216	7.549150714	0.814661652	0.051892237	0.046658611	0.03158798	0.046658611	0.000217537	0.020744939
106	ENSG00000138074	SLC5A6	1.04E-09	1.71E-07	0.667518287	0.109383381	10.04077595	0.148031868	0.003319365	0.014627721	0.012906526	0.014627721	0.000219072	0.020744939
107	ENSG00000183513	COA5	1.07E-09	1.74E-07	-0.715156658	0.117262083	9.295736966	0.162554364	0.004729062	0.006670501	0.015896532	0.015896532	9.79E-05	0.020744939
108	ENSG00000074964	ARHGEF10L	1.18E-09	1.90E-07	-0.706467883	0.116140608	10.55509924	0.16591543	0.003478385	0.016754576	0.011577679	0.016754576	0.000223195	0.020744939
109	ENSG00000139970	RTN1	1.26E-09	2.00E-07	-1.015716953	0.167255721	7.609645909	0.321988507	0.011222652	0.004382633	0.030739062	0.030739062	7.27E-05	0.020744939
110	ENSG00000261796	ISY1-RAB43	1.38E-09	2.18E-07	-0.730021552	0.120503442	11.31626402	0.174551834	0.011492444	0.006848049	0.010289175	0.010289175	0.000171614	0.020744939
111	ENSG00000204118	NAP1L6	1.44E-09	2.26E-07	-1.000658128	0.165384522	7.727918156	0.331046151	0.011877531	0.026436399	0.029150529	0.029150529	0.000204136	0.020744939
112	ENSG00000170515	PA2G4	1.48E-09	2.30E-07	0.5481971	0.090666367	12.23718298	0.100020486	0.000326944	0.012003641	0.009484636	0.012003641	0.000231087	0.020744939
113	ENSG00000171843	MLLT3	1.57E-09	2.42E-07	-0.928037754	0.153727975	9.218696908	0.28673497	0.007191603	0.028256833	0.016293831	0.028256833	0.000233175	0.020744939
114	ENSG00000138735	PDE5A	1.64E-09	2.50E-07	-1.055865565	0.175111524	8.986605281	0.371252482	0.005494065	0.040502003	0.017599033	0.040502003	0.000234785	0.020744939
115	ENSG00000013563	DNASE1L1	1.73E-09	2.60E-07	-1.091722093	0.181320078	9.153393488	0.397009504	0.006721421	0.042594035	0.016643912	0.042594035	0.000236748	0.020744939
116	ENSG00000145284	SCD5	1.73E-09	2.60E-07	-0.801339719	0.133091761	9.712053723	0.213899704	0.002185761	0.024384364	0.014052473	0.024384364	0.00023675	0.020744939
117	ENSG00000023909	GCLM	1.77E-09	2.63E-07	0.613039534	0.101874878	12.09657462	0.12519943	0.001687129	0.013880607	0.009571396	0.013880607	0.000237518	0.020744939
118	ENSG00000150990	DHX37	1.81E-09	2.67E-07	0.522180179	0.086832017	11.99343912	0.088430364	0.001667062	0.006618841	0.009642637	0.009642637	0.000147115	0.020744939
119	ENSG00000170382	LRRN2	1.88E-09	2.74E-07	-2.554804759	0.425220457	5.761740524	2.175083131	0.067891517	0.203327139	0.070715735	0.203327139	0.000239662	0.020744939
120	ENSG00000178033	CALHM5	2.01E-09	2.90E-07	-0.641561597	0.10697423	9.691434982	0.137212568	0.002528208	0.01463702	0.014132484	0.01463702	0.000242166	0.020744939
121	ENSG00000144649	FAM198A	2.04E-09	2.93E-07	-2.710850473	0.452229661	4.598559883	2.368042361	0.183436899	0.020849694	0.1233306	0.1233306	0.00013301	0.020744939
122	ENSG00000165244	ZNF367	2.08E-09	2.97E-07	0.535715263	0.089418072	11.30073293	0.095691963	0.000835185	0.011158202	0.010308513	0.011158202	0.000243616	0.020744939
123	ENSG00000092969	TGFB2	2.15E-09	3.04E-07	0.624198939	0.104280551	10.76656659	0.123864171	0.00516316	0.003557936	0.01114849	0.01114849	0.000106084	0.020744939
124	ENSG00000214274	ANG	2.18E-09	3.06E-07	-1.128044775	0.188527284	7.045992915	0.404066764	0.013704762	0.014196813	0.039609043	0.039609043	0.000104206	0.020744939
125	ENSG00000183578	TNFAIP8L3	2.24E-09	3.11E-07	-0.883992232	0.147837781	8.137878159	0.253973708	0.008423961	0.016002325	0.024360053	0.024360053	0.000155578	0.020744939
126	ENSG00000009950	MLXIPL	2.27E-09	3.13E-07	-1.597541261	0.267269611	7.460662885	0.833832916	0.074275339	0.010964026	0.032874229	0.032874229	0.000170712	0.020744939
127	ENSG00000135316	SYNCRIP	2.41E-09	3.29E-07	0.499480741	0.083696251	14.61865811	0.081497505	0.000777366	0.007539137	0.009730228	0.009730228	0.00017106	0.020744939
128	ENSG00000043591	ADRB1	2.45E-09	3.31E-07	-2.360956027	0.395822627	4.713947425	1.795673183	0.118373017	0.035925952	0.116640312	0.116640312	0.000134708	0.020744939
129	ENSG00000065534	MYLK	2.46E-09	3.31E-07	0.794086888	0.133139864	11.4757283	0.210443664	0.010808004	0.015781331	0.010104244	0.015781331	0.000249987	0.020744939
130	ENSG00000081177	EXD2	2.52E-09	3.37E-07	-0.616251276	0.103393138	11.15266154	0.12205667	0.005529382	0.004629343	0.01050583	0.01050583	0.000129841	0.020744939
131	ENSG00000161958	FGF11	2.94E-09	3.90E-07	-1.042168116	0.175603928	9.303792656	0.362838402	0.004566052	0.041689057	0.015855925	0.041689057	0.000257225	0.020744939
132	ENSG00000160193	WDR4	3.06E-09	4.02E-07	0.657558338	0.110913267	9.817159291	0.141023621	0.00479216	0.009343753	0.013660469	0.013660469	0.000169872	0.020744939
133	ENSG00000154229	PRKCA	3.34E-09	4.36E-07	0.542276007	0.091692039	10.6146883	0.094362597	0.001158984	0.006520537	0.011452161	0.011452161	0.000130151	0.020744939
134	ENSG00000170891	CYTL1	3.41E-09	4.42E-07	-1.35110933	0.228589194	8.931430262	0.61035255	0.002365558	0.076013972	0.017936051	0.076013972	0.000263313	0.020744939
135	ENSG00000167720	SRR	3.65E-09	4.69E-07	-1.33091801	0.225601853	7.057331837	0.59247826	0.036493485	0.039850809	0.039408724	0.039850809	0.000266205	0.020744939
136	ENSG00000116329	OPRD1	3.73E-09	4.76E-07	-1.511418352	0.256354185	5.868805276	0.699078561	0.031267872	-0.014064208	0.067308331	0.067308331	6.15E-05	0.020744939
137	ENSG00000168453	HR	3.85E-09	4.88E-07	-2.742368639	0.465544242	4.513414208	2.516253455	0.163796111	0.161301051	0.128497719	0.161301051	0.00026848	0.020744939
138	ENSG00000162496	DHRS3	4.41E-09	5.55E-07	-0.618784901	0.105450783	9.456062526	0.127678974	0.001553991	0.014459194	0.015125811	0.015125811	0.000255438	0.020744939
139	ENSG00000158793	NIT1	4.75E-09	5.94E-07	-0.642201497	0.109672017	9.753113676	0.133073011	0.004145693	0.007537034	0.013896234	0.013896234	0.000147875	0.020744939
140	ENSG00000146859	TMEM140	4.82E-09	5.94E-07	-1.468300138	0.250852806	5.836782578	0.709044244	0.026082925	0.051757894	0.06830777	0.06830777	0.000203316	0.020744939
141	ENSG00000164096	C4orf3	4.79E-09	5.94E-07	-0.620074943	0.105919676	10.52217603	0.125883957	0.005179587	0.007990509	0.01164888	0.01164888	0.000188408	0.020744939
142	ENSG00000115234	SNX17	5.27E-09	6.45E-07	-0.488298305	0.083634942	11.68287858	0.077242065	0.00059504	0.006544329	0.009897165	0.009897165	0.000159544	0.020744939
143	ENSG00000120057	SFRP5	5.47E-09	6.65E-07	-1.948553694	0.334107386	6.037597201	1.273011744	0.041572449	0.125869169	0.062302445	0.125869169	0.000284309	0.020744939
144	ENSG00000280071	GATD3B	5.53E-09	6.67E-07	-0.554063127	0.095029845	10.8654078	0.10293259	0.001123566	0.012422441	0.010964246	0.012422441	0.000284786	0.020744939
145	ENSG00000159247	TUBBP5	5.80E-09	6.95E-07	-1.18275447	0.203138008	8.492904537	0.469190502	0.015349973	0.046547603	0.021069465	0.046547603	0.000287034	0.020744939
146	ENSG00000103227	LMF1	5.94E-09	7.06E-07	-1.378807001	0.236966596	6.707491943	0.615040374	0.038155474	0.017729214	0.046074278	0.046074278	0.000157955	0.020744939
147	ENSG00000100234	TIMP3	6.34E-09	7.50E-07	-0.602180359	0.103690678	13.21783223	0.121688464	0.000232209	0.015895426	0.009197346	0.015895426	0.000291291	0.020744939
148	ENSG00000132002	DNAJB1	6.70E-09	7.86E-07	-0.578523744	0.099774281	10.77109194	0.112352805	0.001272139	0.013660221	0.011139738	0.013660221	0.000293931	0.020744939
149	ENSG00000125144	MT1G	6.92E-09	8.07E-07	-1.645461409	0.284048102	5.692165207	0.879124875	0.047991032	0.035586343	0.073033954	0.073033954	0.000170125	0.020744939
150	ENSG00000224740	FLOT1	7.21E-09	8.35E-07	-0.752041477	0.129976648	11.48265277	0.18994263	0.004517718	0.020823176	0.010096747	0.020823176	0.00029754	0.020744939
151	ENSG00000124193	SRSF6	7.43E-09	8.55E-07	0.521098346	0.090142363	12.61612953	0.09121382	0.000441897	0.011746572	0.009308772	0.011746572	0.000299056	0.020744939
152	ENSG00000188807	TMEM201	7.70E-09	8.80E-07	0.579173566	0.100291181	10.33873027	0.10772058	0.00301289	0.005847078	0.012074591	0.012074591	0.000144305	0.020744939
153	ENSG00000104177	MYEF2	8.09E-09	9.19E-07	-0.651933075	0.113055654	9.333606473	0.137280203	0.003465221	0.008753758	0.015707151	0.015707151	0.000159041	0.020744939
154	ENSG00000223532	HLA-B	8.54E-09	9.63E-07	-1.650242323	0.286623625	7.600462423	0.915573641	0.031354141	0.091875513	0.030866343	0.091875513	0.000306049	0.020744939
155	ENSG00000125124	BBS2	8.66E-09	9.71E-07	-0.828914231	0.144031735	8.704562353	0.214246961	0.011670032	-0.001523383	0.019447679	0.019447679	9.31E-05	0.020744939
156	ENSG00000188643	S100A16	8.80E-09	9.80E-07	0.486209329	0.08452387	11.53499421	0.076762117	0.000675003	0.006627826	0.010041424	0.010041424	0.000174476	0.020744939
157	ENSG00000166311	SMPD1	9.18E-09	1.02E-06	-0.768993524	0.133849794	9.891909963	0.198904233	0.002267987	0.024605664	0.013396933	0.024605664	0.000309822	0.020744939
158	ENSG00000087076	HSD17B14	9.36E-09	1.03E-06	-1.795627266	0.312717113	5.264022459	1.056501459	0.057332335	0.054190508	0.089355654	0.089355654	0.000202756	0.020744939
159	ENSG00000277377	SERPINA1	9.58E-09	1.05E-06	-0.772257689	0.134588542	9.637075488	0.193355852	0.012822547	0.005229041	0.014348566	0.014348566	0.000171803	0.020744939
160	ENSG00000109107	ALDOC	9.81E-09	1.07E-06	-2.121003507	0.369900682	7.8702671	1.513788581	0.019208182	0.18603159	0.027362518	0.18603159	0.000313301	0.020744939
161	ENSG00000114251	WNT5A	1.04E-08	1.12E-06	1.091570261	0.190683279	9.552360179	0.401089826	0.001438776	0.053101393	0.014700847	0.053101393	0.000316271	0.020744939
162	ENSG00000100938	GMPR2	1.08E-08	1.15E-06	-0.649337447	0.113570286	10.98885396	0.141969588	0.002054145	0.01729317	0.010753985	0.01729317	0.000318497	0.020744939
163	ENSG00000267001	AC006538.2	1.08E-08	1.15E-06	-7.341391716	1.284099476	2.670695858	16.29616253	2.168722302	-2.009531259	0.304644895	0.304644895	6.15E-05	0.020744939
164	ENSG00000070759	TESK2	1.12E-08	1.18E-06	-0.920858236	0.1612219	8.444985016	0.285584969	0.012935039	0.026053713	0.021469322	0.026053713	0.000320332	0.020744939
165	ENSG00000120437	ACAT2	1.15E-08	1.21E-06	-0.46626195	0.081702966	12.93441157	0.072419119	0.000788498	0.008210323	0.009224564	0.009224564	0.000268733	0.020744939
166	ENSG00000136944	LMX1B	1.15E-08	1.21E-06	-0.715369121	0.125364031	9.622521781	0.168848238	0.009166496	0.009986435	0.014407715	0.014407715	0.000230655	0.020744939
167	ENSG00000172893	DHCR7	1.16E-08	1.21E-06	-0.572314566	0.100310163	10.49877101	0.101564294	0.003392829	0.000733552	0.011700364	0.011700364	8.96E-05	0.020744939
168	ENSG00000111696	NT5DC3	1.18E-08	1.22E-06	0.94064549	0.164929763	7.391261695	0.298086373	0.004252115	0.036550625	0.033920044	0.036550625	0.000323046	0.020744939
169	ENSG00000275993	SIK1B	1.20E-08	1.24E-06	0.77681836	0.136300128	8.561955535	0.193134377	0.007351149	0.007774285	0.020515438	0.020515438	0.000144341	0.020744939
170	ENSG00000178409	BEND3	1.21E-08	1.24E-06	0.550808994	0.096667548	10.28276351	0.094571518	0.001800966	0.002641976	0.012215956	0.012215956	9.74E-05	0.020744939
171	ENSG00000138798	EGF	1.30E-08	1.32E-06	-1.511256834	0.265801224	5.580419384	0.751965901	0.029035903	0.054460017	0.076939533	0.076939533	0.000225538	0.020744939
172	ENSG00000213931	HBE1	1.33E-08	1.34E-06	-1.97887365	0.348253093	6.708982438	1.320318537	0.056747342	0.125172983	0.046043603	0.125172983	0.000329927	0.020744939
173	ENSG00000073008	PVR	1.36E-08	1.35E-06	0.48651402	0.085675774	12.91274855	0.079817173	0.000753345	0.010257162	0.009228488	0.010257162	0.000331167	0.020744939
174	ENSG00000138413	IDH1	1.36E-08	1.35E-06	-0.786625954	0.138539215	11.05878345	0.208665854	0.001545967	0.027243704	0.010643957	0.027243704	0.000331349	0.020744939
175	ENSG00000151500	THYN1	1.36E-08	1.35E-06	-0.480189145	0.084565403	11.60878057	0.076461596	0.000759652	0.008349238	0.009967309	0.009967309	0.000253302	0.020744939
176	ENSG00000225614	ZNF469	1.38E-08	1.36E-06	1.515908156	0.26707155	5.999079386	0.758357443	0.043583539	0.042621688	0.06340728	0.06340728	0.000235084	0.020744939
177	ENSG00000198963	RORB	1.46E-08	1.43E-06	-0.671332292	0.118469555	9.773574828	0.152048156	0.005398261	0.015654292	0.013819878	0.015654292	0.000335133	0.020744939
178	ENSG00000006047	YBX2	1.50E-08	1.46E-06	-1.260687726	0.222659393	6.811330917	0.509412582	0.030379682	0.010385967	0.043986126	0.043986126	0.000151549	0.020744939
179	ENSG00000197746	PSAP	1.55E-08	1.51E-06	-0.649843956	0.114901399	13.39230605	0.142531948	0.000274816	0.019528682	0.009202813	0.019528682	0.000338881	0.020744939
180	ENSG00000065308	TRAM2	1.62E-08	1.57E-06	0.462451192	0.081878986	12.83383862	0.072203334	0.000288444	0.009767808	0.009245004	0.009767808	0.000341516	0.020744939
181	ENSG00000133943	DGLUCY	1.72E-08	1.65E-06	-0.565890492	0.100370625	10.20866663	0.10630518	0.00269853	0.010095926	0.012412863	0.012412863	0.000262802	0.020744939
182	ENSG00000240303	ACAD11	1.75E-08	1.67E-06	-0.80749711	0.143302436	9.159780184	0.217059074	0.01419427	0.012610228	0.016609112	0.016609112	0.000274836	0.020744939
183	ENSG00000050030	NEXMIF	1.83E-08	1.73E-06	-1.1403216	0.202640835	7.125671011	0.419006985	0.023373067	0.012760658	0.038221895	0.038221895	0.000168143	0.020744939
184	ENSG00000153048	CARHSP1	1.83E-08	1.73E-06	-0.554198229	0.098484115	10.22466081	0.100388781	0.002179316	0.008130781	0.012369365	0.012369365	0.000208304	0.020744939
185	ENSG00000055118	KCNH2	1.86E-08	1.74E-06	-1.256038365	0.223303825	7.487288998	0.53312723	0.014117286	0.060679611	0.03248163	0.060679611	0.000349615	0.020744939
186	ENSG00000072832	CRMP1	1.92E-08	1.78E-06	-0.853352174	0.151856635	11.3054613	0.246135505	0.000854109	0.033736548	0.0103026	0.033736548	0.00035151	0.020744939
187	ENSG00000101210	EEF1A2	1.92E-08	1.78E-06	-0.883835689	0.157300296	7.909107197	0.263131916	0.010217151	0.025760671	0.026897923	0.026897923	0.000333115	0.020744939
188	ENSG00000280479	CACFD1	1.93E-08	1.78E-06	-1.132843534	0.201627258	9.157169703	0.433784603	0.0212171	0.039763227	0.016623321	0.039763227	0.00035185	0.020744939
189	ENSG00000135763	URB2	1.95E-08	1.79E-06	0.495479171	0.08821789	11.07542038	0.075318446	0.001054898	0.001030806	0.010618696	0.010618696	8.37E-05	0.020744939
190	ENSG00000099399	MAGEB2	2.01E-08	1.83E-06	-0.643275876	0.114644186	11.73535979	0.139913103	0.000600652	0.019114282	0.009849846	0.019114282	0.000354514	0.020744939
191	ENSG00000109956	B3GAT1	2.03E-08	1.83E-06	-1.399527046	0.249478066	8.14418574	0.662289953	0.008131991	0.085226967	0.024294819	0.085226967	0.000354962	0.020744939
192	ENSG00000197903	HIST1H2BK	2.02E-08	1.83E-06	0.445697412	0.079438562	13.02908944	0.063827059	0.000255234	0.005036271	0.009210493	0.009210493	0.000163072	0.020744939
193	ENSG00000172534	HCFC1	2.06E-08	1.85E-06	0.533609518	0.095168701	12.5260291	0.093580963	0.004242573	0.005956462	0.00934305	0.00934305	0.000229096	0.020744939
194	ENSG00000125965	GDF5	2.12E-08	1.89E-06	1.834775412	0.327508108	8.394198049	1.138634117	0.008583279	0.152309063	0.02190785	0.152309063	0.000357708	0.020744939
195	ENSG00000187193	MT1X	2.14E-08	1.90E-06	-0.96595814	0.172473329	9.94184384	0.315618998	0.003607204	0.04101337	0.013227509	0.04101337	0.000358292	0.020744939
196	ENSG00000150556	LYPD6B	2.17E-08	1.92E-06	-1.365958785	0.244001963	7.228600817	0.63119737	0.00719203	0.082113407	0.036498159	0.082113407	0.000359195	0.020744939
197	ENSG00000134775	FHOD3	2.19E-08	1.92E-06	0.603399508	0.107816923	10.2363701	0.115726974	0.005098858	0.003025747	0.012337875	0.012337875	0.000140746	0.020744939
198	ENSG00000164543	STK17A	2.20E-08	1.92E-06	-0.534482115	0.095521883	12.92908385	0.096650656	0.001075932	0.012610713	0.009225505	0.012610713	0.000360203	0.020744939
199	ENSG00000183166	CALN1	2.19E-08	1.92E-06	-1.049563195	0.187558207	9.825724069	0.37179828	0.039137471	0.012516792	0.013629651	0.013629651	0.000346779	0.020744939
200	ENSG00000066468	FGFR2	2.22E-08	1.93E-06	-1.11638784	0.199577681	7.861930925	0.421694044	0.02937805	0.030368826	0.027463527	0.030368826	0.000360804	0.020744939
201	ENSG00000106344	RBM28	2.24E-08	1.94E-06	0.552806033	0.09885405	10.61583543	0.103404901	0.002163384	0.012494801	0.011449784	0.012494801	0.000361394	0.020744939
202	ENSG00000142235	LMTK3	2.29E-08	1.97E-06	-2.194325045	0.392666536	5.965242558	1.505039488	0.166884746	-0.091233787	0.064395767	0.064395767	0.000111617	0.020744939
203	ENSG00000185559	DLK1	2.32E-08	1.98E-06	-2.47424705	0.442923354	6.575592162	2.071986856	0.030594423	0.263677223	0.048873917	0.263677223	0.000363597	0.020744939
204	ENSG00000196584	XRCC2	2.32E-08	1.98E-06	0.615385605	0.11015913	11.25457661	0.128171873	0.001148414	0.017054137	0.010367463	0.017054137	0.000363538	0.020744939
205	ENSG00000167962	ZNF598	2.53E-08	2.15E-06	0.541333002	0.097168931	11.39352541	0.099242587	0.003703304	0.010459397	0.010196557	0.010459397	0.000369245	0.020744939
206	ENSG00000169174	PCSK9	2.57E-08	2.16E-06	-2.106523306	0.378280434	6.634566331	1.502947436	0.030771495	0.183872635	0.047601057	0.183872635	0.000370139	0.020744939
207	ENSG00000184992	BRI3BP	2.57E-08	2.16E-06	0.550004663	0.098776412	11.01971166	0.102459674	0.001048122	0.013587047	0.010704656	0.013587047	0.000370329	0.020744939
208	ENSG00000160408	ST6GALNAC6	2.59E-08	2.17E-06	-0.741211481	0.133146713	11.40398783	0.186091995	0.003056108	0.023535963	0.01018446	0.023535963	0.000370821	0.020744939
209	ENSG00000130584	ZBTB46	2.67E-08	2.22E-06	-1.039161452	0.186847058	8.260213721	0.345658556	0.02922848	-0.002101481	0.023139255	0.023139255	0.000159982	0.020744939
210	ENSG00000099282	TSPAN15	2.74E-08	2.26E-06	-1.039431811	0.187029849	7.072480941	0.33492352	0.013327629	0.000169838	0.039142618	0.039142618	0.000102343	0.020744939
211	ENSG00000178209	PLEC	2.75E-08	2.27E-06	0.513155707	0.092352994	15.17873228	0.089233524	0.001972036	0.010821577	0.010277898	0.010821577	0.00037479	0.020744939
212	ENSG00000183765	CHEK2	2.98E-08	2.44E-06	-0.585979711	0.10572227	11.03364073	0.111445357	0.006083004	0.004459109	0.010682793	0.010682793	0.000197995	0.020744939
213	ENSG00000166166	TRMT61A	3.09E-08	2.51E-06	0.584184377	0.105519384	10.94617251	0.115742624	0.001028282	0.015673228	0.0108243	0.015673228	0.000382619	0.020744939
214	ENSG00000175161	CADM2	3.09E-08	2.51E-06	-1.683883727	0.304153791	5.474017086	0.905410063	0.057883842	0.010579585	0.080880451	0.080880451	0.000157517	0.020744939
215	ENSG00000128591	FLNC	3.25E-08	2.61E-06	0.748780304	0.135462269	15.01120579	0.190221615	0.000911729	0.02661331	0.010092064	0.02661331	0.000386044	0.020744939
216	ENSG00000169660	HEXDC	3.24E-08	2.61E-06	-0.709821164	0.128401708	8.761380009	0.170938224	0.004990877	0.019739621	0.019048795	0.019739621	0.000385831	0.020744939
217	ENSG00000126432	PRDX5	3.26E-08	2.61E-06	-0.723079789	0.130834507	11.73092904	0.177394516	0.00038474	0.025291763	0.009853772	0.025291763	0.000386408	0.020744939
218	ENSG00000164256	PRDM9	3.30E-08	2.63E-06	-1.923873375	0.348242274	5.055207688	1.186926357	0.083096735	0.012577925	0.098812288	0.098812288	0.000168806	0.020744939
219	ENSG00000127838	PNKD	3.48E-08	2.76E-06	-0.718136157	0.130209592	10.42139497	0.175061307	0.002404166	0.023027641	0.011876164	0.023027641	0.00039098	0.020744939
220	ENSG00000137962	ARHGAP29	3.52E-08	2.78E-06	0.453183901	0.082195342	12.74296765	0.069719984	0.000257325	0.009876786	0.00926836	0.009876786	0.000391678	0.020744939
221	ENSG00000172828	CES3	3.54E-08	2.78E-06	-2.601314266	0.4718881	4.349119268	2.255019644	0.194968049	0.086243039	0.139049519	0.139049519	0.000296765	0.020744939
222	ENSG00000164338	UTP15	3.58E-08	2.80E-06	0.577620289	0.104818961	10.40059931	0.113277977	0.002719212	0.01376131	0.011924991	0.01376131	0.00039283	0.020744939
223	ENSG00000196502	SULT1A1	3.75E-08	2.92E-06	-2.46020491	0.447118085	9.087622253	2.055679958	0.011448383	0.28842349	0.017009663	0.28842349	0.000396198	0.020744939
224	ENSG00000144746	ARL6IP5	3.84E-08	2.98E-06	-0.542162811	0.098611836	9.832003356	0.098369231	0.000979281	0.011754565	0.013607161	0.013607161	0.000318243	0.020744939
225	ENSG00000149932	TMEM219	3.95E-08	3.05E-06	-0.689115361	0.125450796	10.70318137	0.161349477	0.002172584	0.021434269	0.011272726	0.021434269	0.000399996	0.020744939
226	ENSG00000050165	DKK3	4.22E-08	3.25E-06	-0.664459358	0.121223639	9.388319584	0.135723028	0.006601267	-0.00251232	0.015441489	0.015441489	9.86E-05	0.020744939
227	ENSG00000087116	ADAMTS2	4.25E-08	3.25E-06	-1.687926088	0.308010773	6.090400648	0.901795584	0.081483737	-0.022649687	0.060822217	0.060822217	0.000145875	0.020744939
228	ENSG00000155016	CYP2U1	4.44E-08	3.38E-06	-0.615081598	0.112397539	9.363243789	0.123798931	0.003387781	0.009488869	0.015562029	0.015562029	0.000233143	0.020744939
229	ENSG00000132274	TRIM22	4.71E-08	3.58E-06	-1.197321971	0.219219717	7.125452881	0.47705645	0.033860298	0.024867802	0.038225628	0.038225628	0.000298486	0.020744939
230	ENSG00000111452	ADGRD1	4.91E-08	3.71E-06	-0.740071731	0.135682798	8.348109267	0.183604858	0.005295573	0.018820687	0.022319159	0.022319159	0.00033329	0.020744939
231	ENSG00000120149	MSX2	5.41E-08	4.05E-06	-1.207825005	0.222135295	9.990486678	0.49686528	0.003217819	0.070798315	0.013067317	0.070798315	0.000423803	0.020744939
232	ENSG00000145040	UCN2	5.41E-08	4.05E-06	1.627893685	0.299403053	6.013593915	0.90258198	0.038789977	0.095673305	0.062988425	0.095673305	0.000423895	0.020744939
233	ENSG00000166106	ADAMTS15	5.49E-08	4.09E-06	1.171473231	0.215549731	9.75347064	0.467458883	0.002717234	0.066975295	0.013894893	0.066975295	0.000424917	0.020744939
234	ENSG00000163703	CRELD1	5.55E-08	4.12E-06	-0.681202216	0.125386282	8.753484815	0.148583922	0.004479212	0.007237019	0.019103368	0.019103368	0.000177392	0.020744939
235	ENSG00000104267	CA2	5.68E-08	4.20E-06	-1.068919094	0.196909369	6.74598234	0.365748669	0.01287119	0.015844135	0.045288759	0.045288759	0.000177298	0.020744939
236	ENSG00000233136	USP17L11	5.97E-08	4.39E-06	-5.796111904	1.069449093	1.898055952	10.2522235	1.284528596	-1.067341674	0.431053448	0.431053448	9.57E-05	0.020744939
237	ENSG00000203668	CHML	6.27E-08	4.59E-06	0.872893865	0.161317595	8.151363094	0.25981115	0.002812666	0.036222384	0.024220895	0.036222384	0.000435594	0.020744939
238	ENSG00000153208	MERTK	6.38E-08	4.66E-06	-0.926964506	0.171411613	8.393121861	0.268999565	0.022155603	-0.008129845	0.021917308	0.021917308	0.000134317	0.020744939
239	ENSG00000107099	DOCK8	6.77E-08	4.92E-06	-1.189728021	0.22043174	8.307073281	0.482944012	0.026872048	0.04601318	0.022696175	0.04601318	0.000441911	0.020744939
240	ENSG00000149541	B3GAT3	7.22E-08	5.23E-06	-0.729365105	0.135430232	10.12565015	0.181601654	0.004103815	0.023408206	0.012648129	0.023408206	0.000447374	0.020744939
241	ENSG00000153233	PTPRR	7.30E-08	5.26E-06	-1.146097498	0.212883486	7.918073723	0.448445096	0.009768967	0.058210101	0.026792074	0.058210101	0.000448246	0.020744939
242	ENSG00000138119	MYOF	7.39E-08	5.31E-06	0.784528983	0.145786656	10.36155862	0.210150216	0.00042701	0.031453613	0.012018611	0.031453613	0.000449346	0.020744939
243	ENSG00000170667	RASA4B	7.59E-08	5.43E-06	-1.213497453	0.225698642	8.286608735	0.450547606	0.053521793	-0.042553311	0.022888022	0.022888022	0.000103491	0.020744939
244	ENSG00000131668	BARX1	7.74E-08	5.48E-06	-1.35473971	0.252129055	6.284176159	0.626878778	0.03069799	0.064655601	0.055711032	0.064655601	0.000453209	0.020744939
245	ENSG00000165732	DDX21	7.73E-08	5.48E-06	0.534345566	0.099442579	14.36486719	0.097524147	9.90E-05	0.014734247	0.009548427	0.014734247	0.00045311	0.020744939
246	ENSG00000106853	PTGR1	7.90E-08	5.56E-06	-0.487788467	0.090846378	12.47140277	0.081284954	0.000408651	0.011970945	0.009366103	0.011970945	0.000455034	0.020744939
247	ENSG00000130005	GAMT	7.88E-08	5.56E-06	-0.624399127	0.116277846	9.662532955	0.133186926	0.002043381	0.018237426	0.014246431	0.018237426	0.000454789	0.020744939
248	ENSG00000230456	DDR1	8.13E-08	5.68E-06	-1.272292999	0.237184284	9.468532389	0.553126504	0.01156248	0.072822097	0.015069242	0.072822097	0.000457541	0.020744939
249	ENSG00000248713	C4orf54	8.15E-08	5.68E-06	-1.70247879	0.3174011	7.001001074	0.990422359	0.018514533	0.132600654	0.040413668	0.132600654	0.000457707	0.020744939
250	ENSG00000139514	SLC7A1	8.64E-08	6.00E-06	0.668936793	0.124958188	8.325781904	0.148537648	0.000898801	0.016969596	0.022523022	0.022523022	0.000306305	0.020744939
251	ENSG00000114353	GNAI2	8.73E-08	6.02E-06	-0.435232463	0.081331572	13.90268758	0.064765979	0.00014686	0.009775377	0.009316559	0.009775377	0.000463761	0.020744939
252	ENSG00000169116	PARM1	8.73E-08	6.02E-06	-1.115560734	0.20846703	6.691766079	0.413721437	0.018788547	0.031684842	0.046399207	0.046399207	0.000313089	0.020744939
253	ENSG00000133256	PDE6B	9.12E-08	6.21E-06	-1.351178273	0.252865634	6.271002897	0.571142854	0.039868252	-0.010570707	0.056043291	0.056043291	0.000141399	0.020744939
254	ENSG00000134321	RSAD2	9.08E-08	6.21E-06	-1.906666955	0.356769181	4.378345364	1.237151136	0.053811624	0.129360218	0.137114749	0.137114749	0.00043523	0.020744939
255	ENSG00000241484	ARHGAP8	9.11E-08	6.21E-06	-1.088812045	0.203757347	6.854567561	0.393858792	0.019130498	0.028626116	0.043145087	0.043145087	0.000311641	0.020744939
256	ENSG00000162624	LHX8	9.79E-08	6.64E-06	-1.62963725	0.30571136	5.910697675	0.908866593	0.044505218	0.095683936	0.06602545	0.095683936	0.000474009	0.020744939
257	ENSG00000215869	AC092506.1	9.86E-08	6.67E-06	-1.389039941	0.26064328	6.924889004	0.63345446	0.060091029	0.008190062	0.04181135	0.04181135	0.000267855	0.020744939
258	ENSG00000145934	TENM2	9.95E-08	6.70E-06	1.040381217	0.195277091	6.862744021	0.361142991	0.014211855	0.03131948	0.042987859	0.042987859	0.000333477	0.020744939
259	ENSG00000142871	CYR61	1.02E-07	6.83E-06	0.868002227	0.163054332	11.18906295	0.257932418	0.001378189	0.038501884	0.010455072	0.038501884	0.000477658	0.020744939
260	ENSG00000157613	CREB3L1	1.02E-07	6.85E-06	1.101637772	0.206985137	6.443285567	0.379049758	0.012403574	0.006306455	0.051860696	0.051860696	0.000141399	0.020744939
261	ENSG00000072682	P4HA2	1.03E-07	6.85E-06	-0.492777289	0.092599539	11.13035409	0.083138446	0.001780037	0.011081975	0.010537694	0.011081975	0.000478568	0.020744939
262	ENSG00000089159	PXN	1.05E-07	6.94E-06	0.479883571	0.09024466	10.77780555	0.074390547	0.00108935	0.005540743	0.011126798	0.011126798	0.000218083	0.020744939
263	ENSG00000099331	MYO9B	1.05E-07	6.94E-06	0.717421226	0.134919377	9.342174672	0.17625185	0.003802199	0.023502658	0.015664896	0.023502658	0.000480697	0.020744939
264	ENSG00000181234	TMEM132C	1.05E-07	6.94E-06	-2.064990544	0.38837122	5.528474573	1.460254429	0.064837509	0.161410798	0.078835433	0.161410798	0.000480877	0.020744939
265	ENSG00000052749	RRP12	1.07E-07	6.99E-06	0.639836537	0.120410858	9.547734887	0.140215768	0.001788232	0.01995993	0.014720648	0.01995993	0.00048255	0.020744939
266	ENSG00000100968	NFATC4	1.07E-07	6.99E-06	-0.633633107	0.11923611	12.68993269	0.137507974	0.003031226	0.018294649	0.009284147	0.018294649	0.000482383	0.020744939
267	ENSG00000130402	ACTN4	1.07E-07	6.99E-06	0.424225777	0.079833432	13.52949678	0.058617364	0.000341051	0.005442838	0.009219014	0.009219014	0.000243626	0.020744939
268	ENSG00000004660	CAMKK1	1.09E-07	7.01E-06	0.461362255	0.086856239	11.24046792	0.067009059	0.000930076	0.003010573	0.010385933	0.010385933	0.000157638	0.020744939
269	ENSG00000124789	NUP153	1.08E-07	7.01E-06	0.421565489	0.079357106	13.85906377	0.055335937	0.000145242	0.002380631	0.009301083	0.009301083	0.000137418	0.020744939
270	ENSG00000100441	KHNYN	1.15E-07	7.33E-06	-0.457206351	0.086240296	11.7485234	0.071636161	0.000853818	0.010302265	0.009838257	0.010302265	0.000488859	0.020744939
271	ENSG00000152518	ZFP36L2	1.14E-07	7.33E-06	0.756816164	0.142733018	9.714676905	0.196278469	0.002551542	0.02800753	0.014042369	0.02800753	0.000488454	0.020744939
272	ENSG00000165795	NDRG2	1.15E-07	7.33E-06	-0.980396087	0.184922993	7.812733893	0.329388762	0.010431876	0.040862894	0.028068986	0.040862894	0.000488804	0.020744939
273	ENSG00000143753	DEGS1	1.22E-07	7.74E-06	0.545897085	0.103176419	9.985941362	0.094565244	0.002885971	0.003569223	0.013082089	0.013082089	0.000177525	0.020744939
274	ENSG00000135926	TMBIM1	1.23E-07	7.81E-06	-0.530882747	0.100380772	9.701381242	0.093648391	0.001020693	0.010351112	0.014093756	0.014093756	0.000322692	0.020744939
275	ENSG00000176208	ATAD5	1.24E-07	7.84E-06	0.470728392	0.089029781	10.9887338	0.069983024	0.001135273	0.003249049	0.010754179	0.010754179	0.000167851	0.020744939
276	ENSG00000100344	PNPLA3	1.25E-07	7.89E-06	-0.895269874	0.169384089	8.791360098	0.274881608	0.019236732	0.023799722	0.018844017	0.023799722	0.000497301	0.020744939
277	ENSG00000103528	SYT17	1.27E-07	7.89E-06	-1.737724409	0.328931487	5.540993332	1.001308861	0.083920186	0.035333595	0.078373699	0.078373699	0.000315051	0.020744939
278	ENSG00000109911	ELP4	1.27E-07	7.89E-06	-0.512077738	0.096926505	10.37697595	0.087990912	0.002110794	0.009543993	0.011981327	0.011981327	0.000369284	0.020744939
279	ENSG00000157445	CACNA2D3	1.27E-07	7.89E-06	-1.461202625	0.276598074	6.978430533	0.732341727	0.056452359	0.058307383	0.040823289	0.058307383	0.000498722	0.020744939
280	ENSG00000198021	SPANXA1	1.26E-07	7.89E-06	-0.450154113	0.085187885	11.43806959	0.068399356	0.000739699	0.008769975	0.010145765	0.010145765	0.000399793	0.020744939
281	ENSG00000137054	POLR1E	1.28E-07	7.90E-06	0.650437368	0.1231427	12.40359395	0.145117581	0.000399506	0.022346681	0.009397121	0.022346681	0.000499139	0.020744939
282	ENSG00000263563	UBBP4	1.36E-07	8.38E-06	-0.971063019	0.184246941	10.17434893	0.323625339	0.00285316	0.048067243	0.012508143	0.048067243	0.000505318	0.020744939
283	ENSG00000007372	PAX6	1.38E-07	8.48E-06	-0.63609003	0.120752691	10.15629852	0.131978798	0.00931246	0.00393209	0.012559359	0.012559359	0.000256714	0.020744939
284	ENSG00000139832	RAB20	1.39E-07	8.50E-06	-0.802760803	0.152424186	8.589132957	0.221207231	0.005847243	0.029002456	0.020304226	0.029002456	0.000507383	0.020744939
285	ENSG00000080608	PUM3	1.45E-07	8.85E-06	0.577246958	0.109774667	10.05334508	0.114424788	0.001841756	0.016233961	0.012867082	0.016233961	0.000511823	0.020744939
286	ENSG00000117305	HMGCL	1.48E-07	8.96E-06	-0.782217855	0.148834749	10.48531444	0.210141571	0.00184484	0.031382834	0.011730306	0.031382834	0.00051339	0.020744939
287	ENSG00000159184	HOXB13	1.52E-07	9.23E-06	-0.921187161	0.175477198	8.968954872	0.291526432	0.004142912	0.042045459	0.017705641	0.042045459	0.000516698	0.020744939
288	ENSG00000135211	TMEM60	1.56E-07	9.41E-06	-0.572456689	0.109137009	9.475356578	0.10817816	0.002827848	0.009504855	0.015038482	0.015038482	0.000304247	0.020744939
289	ENSG00000164615	CAMLG	1.58E-07	9.47E-06	-0.492681188	0.09395946	10.84802559	0.079757605	0.002246983	0.006424491	0.010995587	0.010995587	0.000286897	0.020744939
290	ENSG00000090238	YPEL3	1.60E-07	9.60E-06	-1.392147826	0.26566098	7.637049054	0.666113578	0.018342436	0.087521199	0.030362638	0.087521199	0.00052187	0.020744939
291	ENSG00000196358	NTNG2	1.61E-07	9.63E-06	-0.867576551	0.165596069	8.440862706	0.258713191	0.007341061	0.033792026	0.021504346	0.033792026	0.000522545	0.020744939
292	ENSG00000215218	UBE2QL1	1.71E-07	1.02E-05	-1.33780102	0.255894493	6.706529401	0.615491861	0.02279084	0.075432147	0.046094099	0.075432147	0.00052885	0.020744939
293	ENSG00000243156	MICAL3	1.72E-07	1.02E-05	0.692073387	0.132403061	9.814211416	0.164726357	0.005998083	0.020297773	0.013671114	0.020297773	0.000529373	0.020744939
294	ENSG00000100321	SYNGR1	1.77E-07	1.04E-05	-1.055104637	0.202060495	8.800449326	0.382967871	0.020506198	0.040736468	0.018782689	0.040736468	0.000532393	0.020744939
295	ENSG00000140945	CDH13	1.77E-07	1.04E-05	0.63773999	0.12211786	9.1323452	0.129306318	0.005609673	0.003506114	0.016759485	0.016759485	0.000193112	0.020744939
296	ENSG00000242372	EIF6	1.77E-07	1.04E-05	0.431942491	0.082714817	12.64066247	0.064182384	0.000297603	0.009965008	0.009300242	0.009965008	0.000532197	0.020744939
297	ENSG00000179222	MAGED1	1.81E-07	1.06E-05	-0.431706205	0.082738118	14.45140643	0.061882439	0.000662429	0.006801778	0.009605966	0.009605966	0.000334007	0.020744939
298	ENSG00000121851	POLR3GL	1.85E-07	1.08E-05	-0.813595229	0.156060649	9.406419978	0.22780707	0.002653361	0.033879028	0.015355736	0.033879028	0.000537227	0.020744939
299	ENSG00000109929	SC5D	1.89E-07	1.09E-05	-0.475107792	0.091200213	11.04335501	0.074272295	0.001808525	0.006384064	0.010667693	0.010667693	0.000298967	0.020744939
300	ENSG00000149582	TMEM25	1.88E-07	1.09E-05	-0.921014102	0.176764144	7.631215456	0.284969595	0.016425996	0.021685882	0.030442348	0.030442348	0.000390405	0.020744939
301	ENSG00000160862	AZGP1	1.89E-07	1.09E-05	-2.00117922	0.384140273	5.648256399	1.37849198	0.070254379	0.151091245	0.074541144	0.151091245	0.000539445	0.020744939
302	ENSG00000204386	NEU1	1.88E-07	1.09E-05	-0.875072359	0.167936989	12.05111511	0.263568889	0.004725764	0.037578484	0.009601997	0.037578484	0.000538738	0.020744939
303	ENSG00000125734	GPR108	1.90E-07	1.09E-05	-0.619131061	0.118862844	9.856437748	0.131951032	0.00438564	0.016806924	0.013520474	0.016806924	0.000539861	0.020744939
304	ENSG00000104823	ECH1	1.93E-07	1.11E-05	-0.519094846	0.099720348	10.33355305	0.087666457	0.002828802	0.005706972	0.012087419	0.012087419	0.000260144	0.020744939
305	ENSG00000160285	LSS	1.94E-07	1.11E-05	-0.600851064	0.115442676	12.07391647	0.124299014	0.002761602	0.017228915	0.009586491	0.017228915	0.000542211	0.020744939
306	ENSG00000229292	RFPL4AL1	1.99E-07	1.13E-05	-0.48261107	0.092812014	10.73291125	0.079341318	0.001707048	0.010127057	0.011214057	0.011214057	0.00047131	0.020744939
307	ENSG00000164086	DUSP7	2.05E-07	1.16E-05	0.602505579	0.115986814	9.896831268	0.125047421	0.002447705	0.017731706	0.013380005	0.017731706	0.000548183	0.020744939
308	ENSG00000102383	ZDHHC15	2.10E-07	1.16E-05	-1.720395951	0.331444419	5.769048247	0.899685838	0.094306006	-0.079609543	0.070477098	0.070477098	0.00011779	0.020744939
309	ENSG00000107201	DDX58	2.08E-07	1.16E-05	-0.67823511	0.130628773	10.86737378	0.158477511	0.001024007	0.024571808	0.010960729	0.024571808	0.000549679	0.020744939
310	ENSG00000135324	MRAP2	2.10E-07	1.16E-05	-1.560611767	0.300692695	7.216718798	0.839152042	0.016045105	0.11957904	0.036693415	0.11957904	0.000550883	0.020744939
311	ENSG00000170381	SEMA3E	2.08E-07	1.16E-05	-1.50967933	0.290775014	11.47504557	0.785199635	0.007482061	0.119343102	0.010104985	0.119343102	0.000549777	0.020744939
312	ENSG00000173221	GLRX	2.10E-07	1.16E-05	-0.802083424	0.154543114	9.698226219	0.221661635	0.009588483	0.026236878	0.014106014	0.026236878	0.000550898	0.020744939
313	ENSG00000213965	NUDT19	2.08E-07	1.16E-05	0.492689832	0.094887651	10.39291009	0.082622443	0.001562275	0.010687052	0.011943224	0.011943224	0.00046797	0.020744939
314	ENSG00000229415	SFTA3	2.10E-07	1.16E-05	-1.247945366	0.240447408	8.096825159	0.536588238	0.01197146	0.074750974	0.024790773	0.074750974	0.000550859	0.020744939
315	ENSG00000075426	FOSL2	2.14E-07	1.18E-05	0.525613592	0.101343759	12.83167421	0.095205563	0.001801835	0.013604001	0.009245506	0.013604001	0.000553039	0.020744939
316	ENSG00000178988	MRFAP1L1	2.19E-07	1.20E-05	-0.418094598	0.080673274	12.5277264	0.059218506	0.000419905	0.008052068	0.009342361	0.009342361	0.000442183	0.020744939
317	ENSG00000189052	CGB5	2.25E-07	1.23E-05	1.90680394	0.368286741	8.024265428	1.253532528	0.018496894	0.184955791	0.025578308	0.184955791	0.000558417	0.020744939
318	ENSG00000196754	S100A2	2.28E-07	1.25E-05	0.616821337	0.11919501	10.0090969	0.131189509	0.003111588	0.018199587	0.013007254	0.018199587	0.000559995	0.020744939
319	ENSG00000162777	DENND2D	2.32E-07	1.26E-05	-0.860216593	0.166337343	8.694046467	0.25519351	0.005571516	0.035930652	0.019523099	0.035930652	0.000562045	0.020744939
320	ENSG00000136235	GPNMB	2.37E-07	1.29E-05	-0.999100085	0.1933323	8.167965036	0.344313147	0.00268461	0.053381457	0.024051144	0.053381457	0.000564323	0.020744939
321	ENSG00000187595	ZNF385C	2.40E-07	1.30E-05	-1.351168445	0.261571319	6.186358576	0.62351846	0.044399261	0.050377751	0.058230071	0.058230071	0.000495753	0.020744939
322	ENSG00000249948	GBA3	2.41E-07	1.30E-05	-2.09409757	0.4055037	4.621856745	1.512893291	0.077590392	0.169059484	0.121951324	0.169059484	0.00056653	0.020744939
323	ENSG00000088543	C3orf18	2.44E-07	1.31E-05	-0.993798199	0.192523309	7.323022979	0.338123429	0.020617841	0.031673373	0.034979996	0.034979996	0.000512536	0.020744939
324	ENSG00000090621	PABPC4	2.45E-07	1.31E-05	0.468035713	0.090677745	10.83605455	0.071055092	0.001316249	0.00535608	0.011017431	0.011017431	0.000259418	0.020744939
325	ENSG00000120708	TGFBI	2.49E-07	1.33E-05	-0.563155004	0.109163646	15.99582818	0.10944311	3.39E-05	0.017841195	0.011483979	0.017841195	0.000569844	0.020744939
326	ENSG00000146909	NOM1	2.50E-07	1.33E-05	0.68132848	0.132099446	8.923875706	0.153961003	0.008192328	0.010180739	0.017983067	0.017983067	0.000342276	0.020744939
327	ENSG00000099797	TECR	2.54E-07	1.35E-05	-0.439339732	0.085234793	11.3032135	0.06505313	0.000592047	0.00834209	0.010305408	0.010305408	0.000420078	0.020744939
328	ENSG00000102760	RGCC	2.64E-07	1.40E-05	-0.871572231	0.169321306	8.100674984	0.262295092	0.004876271	0.038128287	0.024749928	0.038128287	0.000576928	0.020744939
329	ENSG00000071626	DAZAP1	2.67E-07	1.41E-05	0.468525429	0.091058883	13.11588875	0.075804888	0.000751371	0.01168621	0.009201985	0.01168621	0.000578275	0.020744939
330	ENSG00000132361	CLUH	2.66E-07	1.41E-05	0.813555297	0.158100395	9.621693138	0.228556548	0.007438888	0.030054715	0.014411099	0.030054715	0.000577953	0.020744939
331	ENSG00000243811	APOBEC3D	2.70E-07	1.42E-05	-1.422551389	0.276593067	7.623918121	0.698900206	0.074316382	0.040439205	0.03054238	0.040439205	0.00057965	0.020744939
332	ENSG00000161647	MPP3	2.75E-07	1.44E-05	1.082499123	0.210611833	8.232993351	0.404770118	0.027153485	0.039382531	0.023402837	0.039382531	0.000581759	0.020744939
333	ENSG00000134815	DHX34	2.77E-07	1.44E-05	0.689466071	0.134185382	10.72494703	0.164215899	0.001546284	0.025462291	0.011229702	0.025462291	0.000582788	0.020744939
334	ENSG00000138675	FGF5	2.78E-07	1.44E-05	1.200120455	0.233586214	6.837007629	0.472712632	0.03835908	0.012423295	0.0434847	0.0434847	0.000304886	0.020744939
335	ENSG00000197785	ATAD3A	2.77E-07	1.44E-05	0.436672874	0.084984293	12.42852415	0.065871756	0.000986202	0.009847293	0.009385406	0.009847293	0.000582714	0.020744939
336	ENSG00000134824	FADS2	2.85E-07	1.47E-05	-1.407628345	0.274237265	11.05593783	0.68467256	0.001575904	0.111233212	0.010648313	0.111233212	0.000586148	0.020744939
337	ENSG00000171517	LPAR3	2.85E-07	1.47E-05	-0.808204228	0.157459455	7.888345228	0.210535138	0.01004518	0.008175965	0.02714504	0.02714504	0.000246071	0.020744939
338	ENSG00000186340	THBS2	2.85E-07	1.47E-05	-0.687011389	0.133844204	9.212213758	0.163092519	0.002767854	0.024103552	0.016328026	0.024103552	0.000586127	0.020744939
339	ENSG00000141376	BCAS3	2.87E-07	1.47E-05	-1.090201221	0.212450474	7.014310164	0.406435269	0.027528795	0.034813278	0.04017401	0.04017401	0.000512259	0.020744939
340	ENSG00000167536	DHRS13	2.89E-07	1.48E-05	-0.562322742	0.109607686	9.602016644	0.102319265	0.003528764	0.005792743	0.014492003	0.014492003	0.00025837	0.020744939
341	ENSG00000169213	RAB3B	2.90E-07	1.48E-05	0.487298131	0.094990877	10.40322497	0.07738688	0.001616113	0.006070186	0.011918787	0.011918787	0.000281488	0.020744939
342	ENSG00000100075	SLC25A1	2.91E-07	1.48E-05	-0.527815157	0.102907017	11.84157771	0.096284477	0.000620525	0.015264257	0.009759486	0.015264257	0.000588605	0.020744939
343	ENSG00000111641	NOP2	2.99E-07	1.51E-05	0.584563075	0.114075384	10.7278054	0.118130029	0.002233044	0.017286746	0.011224081	0.017286746	0.000591626	0.020744939
344	ENSG00000153207	AHCTF1	3.05E-07	1.54E-05	0.456454493	0.08914939	13.19897054	0.067534796	0.002723652	0.003563329	0.009197769	0.009197769	0.000265921	0.020744939
345	ENSG00000117481	NSUN4	3.09E-07	1.55E-05	-0.478168373	0.093434028	11.04922442	0.078103152	0.002436248	0.009450819	0.010658628	0.010658628	0.000508619	0.020744939
346	ENSG00000121005	CRISPLD1	3.10E-07	1.55E-05	-0.90972932	0.177776841	9.458176007	0.285914507	0.032290718	0.014749628	0.01511619	0.01511619	0.000588351	0.020744939
347	ENSG00000143869	GDF7	3.09E-07	1.55E-05	-1.402595159	0.274046438	6.154261828	0.680303694	0.034642976	0.0780092	0.059083408	0.0780092	0.000595687	0.020744939
348	ENSG00000177084	POLE	3.15E-07	1.57E-05	0.736345854	0.14398349	8.725054844	0.183561289	0.011794716	0.014329938	0.019302152	0.019302152	0.000454849	0.020744939
349	ENSG00000258659	TRIM34	3.28E-07	1.63E-05	-0.954984849	0.187019552	7.399969174	0.31303429	0.018677423	0.030616916	0.033787046	0.033787046	0.000543912	0.020744939
350	ENSG00000119801	YPEL5	3.34E-07	1.66E-05	-0.978360548	0.191705709	11.35579715	0.331258103	0.001668681	0.053457937	0.010241051	0.053457937	0.000605305	0.020744939
351	ENSG00000137090	DMRT1	3.39E-07	1.68E-05	-1.26765089	0.248530485	7.254563653	0.556202516	0.01825647	0.074394633	0.036074781	0.074394633	0.000607208	0.020744939
352	ENSG00000136514	RTP4	3.41E-07	1.68E-05	-1.202569365	0.23583324	6.593735338	0.500592704	0.023720486	0.05970549	0.048478606	0.05970549	0.000608106	0.020744939
353	ENSG00000099821	POLRMT	3.45E-07	1.70E-05	0.496417436	0.097393959	10.78127109	0.07766258	0.003108229	0.001558645	0.011120146	0.011120146	0.000195815	0.020744939
354	ENSG00000042445	RETSAT	3.56E-07	1.74E-05	-0.526302793	0.103379409	10.19695562	0.090763126	0.003585878	0.005995044	0.012445075	0.012445075	0.000309537	0.020744939
355	ENSG00000179546	HTR1D	3.57E-07	1.74E-05	0.895155818	0.175847077	7.866778883	0.277497815	0.010235652	0.03614764	0.027404729	0.03614764	0.000613935	0.020744939
356	ENSG00000260230	FRRS1L	3.57E-07	1.74E-05	-1.945251098	0.382124763	5.711832157	1.232097193	0.146658924	-0.02553812	0.072370078	0.072370078	0.000287266	0.020744939
357	ENSG00000134255	CEPT1	3.61E-07	1.76E-05	-0.462356568	0.0908646	11.54359636	0.071874043	0.002352009	0.007325446	0.010032555	0.010032555	0.000423594	0.020744939
358	ENSG00000103202	NME4	3.62E-07	1.76E-05	-0.442773893	0.087028806	11.68872319	0.067903432	0.000669254	0.010691766	0.009891806	0.010691766	0.000615869	0.020744939
359	ENSG00000139278	GLIPR1	3.73E-07	1.81E-05	0.87721006	0.172606913	11.42064963	0.266601022	0.001492781	0.043196938	0.010165408	0.043196938	0.000619631	0.020744939
360	ENSG00000100345	MYH9	3.76E-07	1.81E-05	0.6468376	0.127314869	11.92899253	0.144970555	0.002077472	0.022236142	0.009690471	0.022236142	0.000620661	0.020744939
361	ENSG00000172086	KRCC1	3.76E-07	1.81E-05	-0.448006249	0.088176214	11.05456856	0.068038368	0.001012155	0.008769706	0.010650412	0.010650412	0.000470987	0.020744939
362	ENSG00000145349	CAMK2D	3.79E-07	1.81E-05	-0.506465895	0.099709494	10.22679617	0.088807933	0.002549374	0.012270154	0.0123636	0.0123636	0.000614831	0.020744939
363	ENSG00000181264	TMEM136	3.78E-07	1.81E-05	-0.574854629	0.113165497	10.14004266	0.112265524	0.00660349	0.009806723	0.012606154	0.012606154	0.000484175	0.020744939
364	ENSG00000126106	TMEM53	3.82E-07	1.82E-05	-0.676521097	0.133238501	9.21618154	0.158607236	0.008085468	0.018543279	0.016307084	0.018543279	0.000622776	0.020744939
365	ENSG00000108370	RGS9	3.93E-07	1.87E-05	-1.283014321	0.252943921	7.890835492	0.570614477	0.053470688	0.042500252	0.02711525	0.042500252	0.000626343	0.020744939
366	ENSG00000177181	RIMKLA	4.02E-07	1.91E-05	-1.024892389	0.202218896	9.947599008	0.364192301	0.015800627	0.045538096	0.01320831	0.045538096	0.000629172	0.020744939
367	ENSG00000148848	ADAM12	4.07E-07	1.93E-05	0.70387516	0.138949515	9.226014178	0.171800433	0.0015616	0.027398852	0.016255382	0.027398852	0.000630936	0.020744939
368	ENSG00000065183	WDR3	4.11E-07	1.94E-05	0.423054881	0.083541871	11.92318013	0.059379339	0.000773955	0.006334431	0.009694911	0.009694911	0.000366197	0.020744939
369	ENSG00000160050	CCDC28B	4.16E-07	1.96E-05	-0.887822966	0.175408379	8.918597392	0.273390605	0.007197248	0.038954902	0.018016045	0.038954902	0.000633882	0.020744939
370	ENSG00000188554	NBR1	4.17E-07	1.96E-05	-0.594774337	0.117518837	12.2023214	0.122699766	0.000656776	0.02005924	0.009505043	0.02005924	0.000634137	0.020744939
371	ENSG00000163795	ZNF513	4.21E-07	1.97E-05	-0.62917841	0.124363972	9.246202967	0.137319319	0.003636537	0.019563059	0.016150087	0.019563059	0.000635486	0.020744939
372	ENSG00000165092	ALDH1A1	4.24E-07	1.97E-05	-2.526310671	0.499483025	3.126514737	2.130822207	0.127023784	0.143161873	0.247201154	0.247201154	0.000396527	0.020744939
373	ENSG00000196924	FLNA	4.24E-07	1.97E-05	0.410893679	0.081237646	13.56393966	0.051006294	0.0006746	-0.000229338	0.009224732	0.009224732	0.000128957	0.020744939
374	ENSG00000176915	ANKLE2	4.28E-07	1.99E-05	0.4731123	0.093572951	11.78674454	0.077657651	0.001269829	0.011864017	0.009805235	0.011864017	0.000637655	0.020744939
375	ENSG00000138760	SCARB2	4.31E-07	2.00E-05	-0.593066742	0.117331987	11.70461062	0.122038602	0.00195741	0.018692783	0.009877354	0.018692783	0.000638694	0.020744939
376	ENSG00000122012	SV2C	4.35E-07	2.01E-05	-2.743523851	0.542966172	3.789801861	2.346572903	0.260818788	-0.15019883	0.181399608	0.181399608	0.000181565	0.020744939
377	ENSG00000131831	RAI2	4.40E-07	2.03E-05	-1.096936923	0.217172777	7.192850009	0.417578002	0.015497953	0.05524807	0.037088485	0.05524807	0.000641249	0.020744939
378	ENSG00000206450	HLA-B	4.48E-07	2.06E-05	-1.151514417	0.228151995	8.787844601	0.460259635	0.008685225	0.069394775	0.01886783	0.069394775	0.000643981	0.020744939
379	ENSG00000106605	BLVRA	4.51E-07	2.07E-05	-0.502759251	0.099633249	10.909956	0.0877422	0.000527148	0.014363029	0.010885917	0.014363029	0.00064472	0.020744939
380	ENSG00000114554	PLXNA1	4.57E-07	2.08E-05	0.480849669	0.095337094	10.78438339	0.074329556	0.002519555	0.003686239	0.011114187	0.011114187	0.000257728	0.020744939
381	ENSG00000136531	SCN2A	4.57E-07	2.08E-05	-1.08647606	0.215425354	8.729135811	0.409818768	0.036932631	0.032679494	0.019273397	0.032679494	0.000646647	0.020744939
382	ENSG00000273673	RPL9P9	4.57E-07	2.08E-05	-0.427639609	0.084789658	15.53835717	0.063463243	3.92E-05	0.010711495	0.010744734	0.010744734	0.000643147	0.020744939
383	ENSG00000011422	PLAUR	4.66E-07	2.10E-05	0.804810404	0.159692539	10.13297077	0.224917984	0.001232609	0.037019952	0.012626714	0.037019952	0.000649261	0.020744939
384	ENSG00000092051	JPH4	4.63E-07	2.10E-05	-0.992488145	0.196887533	7.178620592	0.315049297	0.020821182	0.003603169	0.037325869	0.037325869	0.000243919	0.020744939
385	ENSG00000172260	NEGR1	4.66E-07	2.10E-05	0.83427563	0.165531887	8.092870335	0.241685715	0.004084239	0.03701697	0.024832831	0.03701697	0.000649104	0.020744939
386	ENSG00000177432	NAP1L5	4.66E-07	2.10E-05	-0.66393094	0.131738821	8.547929815	0.147996344	0.005406747	0.014287073	0.020625928	0.020625928	0.000429105	0.020744939
387	ENSG00000175155	YPEL2	4.72E-07	2.12E-05	-1.447835445	0.287428455	6.060346528	0.728006383	0.04185407	0.082068605	0.061659907	0.082068605	0.000651093	0.020744939
388	ENSG00000134330	IAH1	4.79E-07	2.14E-05	-0.506478644	0.100598825	10.22805945	0.084070017	0.002819991	0.006072299	0.012360195	0.012360195	0.000323907	0.020744939
389	ENSG00000134121	CHL1	4.85E-07	2.16E-05	-3.767657451	0.748694631	3.414544514	4.93122518	0.3576688	0.483146675	0.216283407	0.483146675	0.000654634	0.020744939
390	ENSG00000099875	MKNK2	4.90E-07	2.18E-05	-0.492199988	0.097847369	10.4521886	0.082511528	0.002556036	0.009735564	0.011805125	0.011805125	0.000513251	0.020744939
391	ENSG00000067445	TRO	4.93E-07	2.19E-05	-0.643021854	0.127860803	9.196206677	0.143661194	0.006127499	0.018395079	0.016412976	0.018395079	0.000656977	0.020744939
392	ENSG00000276879	IFI27L2	5.02E-07	2.23E-05	-0.913360478	0.181749469	10.71247731	0.289907653	0.00148465	0.048064654	0.011254302	0.048064654	0.000659672	0.020744939
393	ENSG00000137965	IFI44	5.05E-07	2.23E-05	-0.45914666	0.091381854	11.82579749	0.073265468	0.001266132	0.011259833	0.009772457	0.011259833	0.000660329	0.020744939
394	ENSG00000097033	SH3GLB1	5.15E-07	2.27E-05	-0.410076237	0.08167986	13.99772594	0.055768536	0.000653347	0.005996378	0.009354052	0.009354052	0.000375689	0.020744939
395	ENSG00000126947	ARMCX1	5.15E-07	2.27E-05	-0.64439865	0.128347591	10.51474324	0.144342611	0.001430319	0.023279337	0.011665149	0.023279337	0.000663084	0.020744939
396	ENSG00000142619	PADI3	5.18E-07	2.27E-05	-1.042767833	0.20774432	6.761310305	0.346955445	0.019756802	0.006175722	0.044979752	0.044979752	0.000242295	0.020744939
397	ENSG00000106733	NMRK1	5.23E-07	2.28E-05	-0.590679799	0.117719149	9.172081068	0.109269934	0.004244262	0.001504671	0.016542435	0.016542435	0.000197915	0.020744939
398	ENSG00000122420	PTGFR	5.22E-07	2.28E-05	-0.55236587	0.11007395	9.463657835	0.104661179	0.003083112	0.013327841	0.015091299	0.015091299	0.000563634	0.020744939
399	ENSG00000026950	BTN3A1	5.29E-07	2.29E-05	-0.58528218	0.116691893	10.09985026	0.119106967	0.005316613	0.015108884	0.01272468	0.015108884	0.000666855	0.020744939
400	ENSG00000145536	ADAMTS16	5.30E-07	2.29E-05	1.323775842	0.263956722	9.24707697	0.609322525	0.031638897	0.072870829	0.016145554	0.072870829	0.000667221	0.020744939
401	ENSG00000154783	FGD5	5.30E-07	2.29E-05	-0.679441397	0.135479508	9.889169643	0.16051782	0.005535168	0.021996878	0.013406381	0.021996878	0.00066725	0.020744939
402	ENSG00000156983	BRPF1	5.27E-07	2.29E-05	0.583835161	0.116389816	9.699003734	0.111546596	0.006216893	0.005392541	0.014102991	0.014102991	0.000323061	0.020744939
403	ENSG00000214530	STARD10	5.30E-07	2.29E-05	-0.87329808	0.174130071	8.398976531	0.265180399	0.014283559	0.031198364	0.021865934	0.031198364	0.000667161	0.020744939
404	ENSG00000055483	USP36	5.33E-07	2.29E-05	0.797674716	0.159088432	7.968011394	0.212733281	0.011751525	0.015558219	0.026212169	0.026212169	0.000415094	0.020744939
405	ENSG00000117984	CTSD	5.34E-07	2.29E-05	-0.912817174	0.182065766	13.45391698	0.28974809	0.000892363	0.048829552	0.00920879	0.048829552	0.000668302	0.020744939
406	ENSG00000164117	FBXO8	5.38E-07	2.29E-05	-0.63018114	0.12572601	9.147956427	0.124369721	0.007036909	-0.000497859	0.016673636	0.016673636	0.000198959	0.020744939
407	ENSG00000174473	GALNTL6	5.37E-07	2.29E-05	-2.761366563	0.550876056	3.993572712	2.651700904	0.234151127	0.221045517	0.164736551	0.221045517	0.000669033	0.020744939
408	ENSG00000179059	ZFP42	5.36E-07	2.29E-05	0.48497892	0.096747949	10.30715743	0.071999083	0.001886649	-8.95E-05	0.0121536	0.0121536	0.000156167	0.020744939
409	ENSG00000115944	COX7A2L	5.41E-07	2.29E-05	-0.443382742	0.088481243	11.69839292	0.068371193	0.000538137	0.011205259	0.00988299	0.011205259	0.000670257	0.020744939
410	ENSG00000165556	CDX2	5.41E-07	2.29E-05	-2.094037133	0.417885366	5.838299055	1.525051269	0.159906058	0.102036211	0.068260067	0.102036211	0.00067026	0.020744939
411	ENSG00000154930	ACSS1	5.45E-07	2.30E-05	-0.784778162	0.156648526	7.880744724	0.212766462	0.00957193	0.025432361	0.027236211	0.027236211	0.000617362	0.020744939
412	ENSG00000164088	PPM1M	5.55E-07	2.34E-05	-0.987480128	0.197242886	8.82601228	0.339220808	0.008180017	0.050177117	0.018612056	0.050177117	0.000673707	0.020744939
413	ENSG00000100612	DHRS7	5.58E-07	2.35E-05	-0.612262348	0.122328117	9.649494555	0.130416557	0.002249885	0.020196367	0.014298531	0.020196367	0.000674707	0.020744939
414	ENSG00000066735	KIF26A	5.63E-07	2.35E-05	-0.837236983	0.16733083	8.484500781	0.243889258	0.006661078	0.035338332	0.021138648	0.035338332	0.000675909	0.020744939
415	ENSG00000186480	INSIG1	5.60E-07	2.35E-05	-0.965398912	0.192910605	12.06547652	0.32425592	0.00052923	0.055292522	0.009592194	0.055292522	0.000675231	0.020744939
416	ENSG00000188505	NCCRP1	5.63E-07	2.35E-05	-2.022276891	0.404166419	4.619337734	1.397640204	0.122925986	0.090522835	0.122099756	0.122099756	0.000542805	0.020744939
417	ENSG00000198133	TMEM229B	5.67E-07	2.36E-05	-1.213624775	0.242619541	6.705924368	0.512502618	0.01636743	0.071928933	0.046106563	0.071928933	0.000676895	0.020744939
418	ENSG00000105976	MET	5.77E-07	2.39E-05	0.742627293	0.148565807	11.50231738	0.191934748	0.000959272	0.032148427	0.010075686	0.032148427	0.000679559	0.020744939
419	ENSG00000169071	ROR2	5.77E-07	2.39E-05	-1.099835245	0.22002838	6.142889065	0.419279546	0.013229695	0.05725565	0.059389038	0.059389038	0.000646388	0.020744939
420	ENSG00000185686	PRAME	5.84E-07	2.42E-05	-0.544906983	0.109061481	10.63257088	0.103350374	0.002148896	0.015692714	0.01141527	0.015692714	0.000681312	0.020744939
421	ENSG00000156697	UTP14A	5.89E-07	2.43E-05	0.423947612	0.084876167	11.54847498	0.062081868	0.000778394	0.009424599	0.010027552	0.010027552	0.000620537	0.020744939
422	ENSG00000172348	RCAN2	5.91E-07	2.43E-05	-1.236840107	0.247660962	7.636214192	0.532535178	0.011678921	0.080325007	0.030374031	0.080325007	0.000683015	0.020744939
423	ENSG00000108387	04-Sep	5.96E-07	2.45E-05	-1.968472858	0.394289154	7.977686268	1.349022343	0.023674285	0.20952162	0.026101695	0.20952162	0.000684253	0.020744939
424	ENSG00000065328	MCM10	6.04E-07	2.48E-05	0.637608526	0.127780246	9.601076314	0.134748358	0.009995791	0.005985419	0.014495896	0.014495896	0.000381562	0.020744939
425	ENSG00000100167	03-Sep	6.08E-07	2.49E-05	-1.333847644	0.267382929	6.53853286	0.619537218	0.018178429	0.089062018	0.049691862	0.089062018	0.000687257	0.020763537
426	ENSG00000091972	CD200	6.16E-07	2.51E-05	-1.751824711	0.351341684	5.088425875	1.059511555	0.087928081	0.08562768	0.097233387	0.097233387	0.000619408	0.020744939
427	ENSG00000174460	ZCCHC12	6.34E-07	2.58E-05	-1.841517926	0.369752239	4.856521471	1.140226513	0.096228449	0.05735909	0.108846628	0.108846628	0.000453467	0.020744939
428	ENSG00000256060	TRAPPC2B	6.38E-07	2.59E-05	-0.500346567	0.100482207	10.51147257	0.083870588	0.003472679	0.007485549	0.011672332	0.011672332	0.000435026	0.020744939
429	ENSG00000171045	TSNARE1	6.47E-07	2.62E-05	-0.850669441	0.170928712	8.371496238	0.249292614	0.021716086	0.018535245	0.022108851	0.022108851	0.000606241	0.020744939
430	ENSG00000164713	BRI3	6.71E-07	2.71E-05	-0.646274161	0.130047286	9.760182982	0.145595843	0.002488448	0.022879997	0.013869741	0.022879997	0.00070199	0.020891804
431	ENSG00000138606	SHF	6.74E-07	2.72E-05	-0.999584903	0.201179049	7.006477305	0.348318605	0.016866103	0.043843412	0.040314889	0.043843412	0.000702696	0.020891804
432	ENSG00000153132	CLGN	6.78E-07	2.73E-05	-0.665303123	0.133929193	10.39136551	0.154312908	0.004213928	0.022691615	0.011946899	0.022691615	0.000703529	0.020891804
433	ENSG00000076928	ARHGEF1	6.80E-07	2.73E-05	0.488161115	0.098279676	10.26874827	0.082050548	0.002236023	0.010964184	0.012252319	0.012252319	0.000605309	0.020744939
434	ENSG00000057019	DCBLD2	6.92E-07	2.76E-05	0.513341748	0.103421425	11.29864745	0.091891114	0.000625857	0.015418129	0.010311129	0.015418129	0.00070667	0.020897703
435	ENSG00000132589	FLOT2	6.91E-07	2.76E-05	-0.767962343	0.154709161	10.46232226	0.205651757	0.000938682	0.034963705	0.011782065	0.034963705	0.000706419	0.020897703
436	ENSG00000162520	SYNC	6.97E-07	2.78E-05	0.782237209	0.157637805	10.19078718	0.213388129	0.003171429	0.034103088	0.012462167	0.034103088	0.000707737	0.020897703
437	ENSG00000040341	STAU2	6.99E-07	2.78E-05	-0.476481746	0.096034985	10.93111412	0.07894267	0.002984379	0.010555888	0.010849699	0.010849699	0.000683174	0.020744939
438	ENSG00000107959	PITRM1	7.06E-07	2.79E-05	0.497499901	0.100310291	10.11160878	0.084118557	0.002403652	0.009929738	0.01268958	0.01268958	0.000520906	0.020744939
439	ENSG00000135916	ITM2C	7.05E-07	2.79E-05	-1.094327246	0.220628056	10.01407937	0.417677723	0.001193459	0.07182165	0.012991286	0.07182165	0.000709474	0.020897703
440	ENSG00000155966	AFF2	7.06E-07	2.79E-05	-1.448595029	0.292067308	7.197408559	0.655768373	0.090942231	-0.058142099	0.037012738	0.037012738	0.000205577	0.020744939
441	ENSG00000001617	SEMA3F	7.37E-07	2.90E-05	-1.284807424	0.259486374	6.440950673	0.576018849	0.024929329	0.076070438	0.051915101	0.076070438	0.000716429	0.020929171
442	ENSG00000128185	DGCR6L	7.46E-07	2.93E-05	-0.475620687	0.096102254	10.42277377	0.078947283	0.001422739	0.012430726	0.011872952	0.012430726	0.00071823	0.020929171
443	ENSG00000110080	ST3GAL4	7.48E-07	2.93E-05	-0.475597469	0.096110805	10.50353651	0.074366344	0.00216611	0.005969463	0.011689821	0.011689821	0.000359236	0.020744939
444	ENSG00000223638	RFPL4A	7.53E-07	2.95E-05	-0.413279955	0.083538398	11.83455986	0.058410479	0.000702761	0.008260217	0.009765235	0.009765235	0.000564322	0.020744939
445	ENSG00000132382	MYBBP1A	7.66E-07	2.99E-05	0.909095499	0.183888987	11.15593261	0.288514579	0.000976741	0.049745999	0.010501206	0.049745999	0.000722588	0.020960732
446	ENSG00000265817	FSBP	7.68E-07	2.99E-05	-1.612979627	0.326301424	6.818625157	0.827190383	0.115865837	-0.057516586	0.043843093	0.043843093	0.000250727	0.020744939
447	ENSG00000154277	UCHL1	7.73E-07	3.00E-05	-0.400274647	0.08099146	14.31503468	0.055581437	0.000322073	0.009072301	0.009517352	0.009517352	0.000670375	0.020744939
448	ENSG00000262655	SPON1	7.73E-07	3.00E-05	-2.07393271	0.419658135	4.400796061	1.501694606	0.091092763	0.173076663	0.135645742	0.173076663	0.000724019	0.020960732
449	ENSG00000186417	GLDN	7.78E-07	3.01E-05	-1.540756184	0.311844366	5.409388905	0.809580092	0.062483846	0.059267663	0.083386518	0.083386518	0.000548189	0.020744939
450	ENSG00000105559	PLEKHA4	7.82E-07	3.02E-05	-1.109901718	0.224680209	7.358981242	0.430141982	0.010860282	0.064861513	0.03441755	0.064861513	0.00072568	0.020960732
451	ENSG00000091947	TMEM101	7.85E-07	3.02E-05	-0.713833047	0.144527504	8.603838974	0.177933125	0.001870941	0.029461359	0.020191498	0.029461359	0.000726362	0.020960732
452	ENSG00000170412	GPRC5C	7.92E-07	3.05E-05	-0.602084313	0.121947072	10.88922937	0.126596962	0.007294687	0.015011945	0.010922007	0.015011945	0.00072785	0.02096885
453	ENSG00000133321	RARRES3	8.08E-07	3.10E-05	-1.9933356	0.404050191	7.881311067	1.387923912	0.011355057	0.233529778	0.027229405	0.233529778	0.000731026	0.021001637
454	ENSG00000182919	C11orf54	8.29E-07	3.17E-05	-0.619336379	0.125665434	9.210817355	0.12899397	0.007352295	0.010048587	0.016335407	0.016335407	0.000470152	0.020744939
455	ENSG00000275214	IFI27	8.30E-07	3.17E-05	-1.055393766	0.214159159	8.091595663	0.389193775	0.013925926	0.054870292	0.024846408	0.054870292	0.000735402	0.021001637
456	ENSG00000180739	S1PR5	8.32E-07	3.17E-05	-1.504670331	0.305355103	5.932945804	0.791099928	0.035658741	0.104203867	0.065355245	0.104203867	0.000735793	0.021001637
457	ENSG00000128610	FEZF1	8.56E-07	3.24E-05	-1.33469432	0.271162112	5.974384591	0.556767291	0.046166313	-0.018235547	0.064127023	0.064127023	0.000214333	0.020744939
458	ENSG00000156587	UBE2L6	8.54E-07	3.24E-05	-1.057822845	0.214887254	10.17469242	0.391108589	0.002245143	0.067019654	0.012507175	0.067019654	0.000739881	0.02100199
459	ENSG00000175305	CCNE2	8.55E-07	3.24E-05	0.585547668	0.118954962	9.148201525	0.107238914	0.004553131	0.000920735	0.016672294	0.016672294	0.000215876	0.020744939
460	ENSG00000173705	SUSD5	8.63E-07	3.25E-05	-0.781776248	0.158880584	8.917913029	0.213643878	0.00785877	0.03000579	0.018020328	0.03000579	0.000741684	0.021018824
461	ENSG00000198000	NOL8	8.64E-07	3.25E-05	0.536710005	0.109078409	9.943942772	0.096364333	0.004626649	0.007807156	0.013220499	0.013220499	0.000445492	0.020744939
462	ENSG00000049769	PPP1R3F	8.83E-07	3.32E-05	-1.273160834	0.258973971	8.990079789	0.566762574	0.030996174	0.069605102	0.017578177	0.069605102	0.000745333	0.021087836
463	ENSG00000142961	MOB3C	9.24E-07	3.47E-05	-0.83437524	0.17003024	9.418242189	0.243546951	0.007797858	0.035567566	0.015300285	0.035567566	0.000752904	0.021164144
464	ENSG00000048028	USP28	9.33E-07	3.49E-05	-0.540284354	0.110144205	10.06664875	0.10213025	0.003285662	0.014911957	0.01282575	0.014911957	0.000754582	0.021173801
465	ENSG00000237550	RPL9P9	9.45E-07	3.53E-05	-0.617483396	0.125944676	9.550914784	0.12310192	0.009086064	0.001809182	0.014707029	0.014707029	0.000306534	0.020744939
466	ENSG00000091986	CCDC80	9.71E-07	3.61E-05	1.004007891	0.205008244	10.63502251	0.352843609	0.002160091	0.060882479	0.011410239	0.060882479	0.0007613	0.021257757
467	ENSG00000156802	ATAD2	9.70E-07	3.61E-05	0.390325579	0.079697321	12.86708562	0.05212705	0.000289875	0.007736166	0.009237619	0.009237619	0.000583661	0.020744939
468	ENSG00000072609	CHFR	9.79E-07	3.63E-05	-0.597716171	0.122084862	9.647518479	0.120055485	0.008050605	0.008044518	0.014306466	0.014306466	0.00047656	0.020744939
469	ENSG00000095203	EPB41L4B	9.82E-07	3.64E-05	0.638409348	0.130414097	11.42090616	0.142679353	0.001033739	0.024478017	0.010165117	0.024478017	0.000763157	0.021257757
470	ENSG00000117115	PADI2	9.84E-07	3.64E-05	-1.131982885	0.231264075	7.343523495	0.448595263	0.022935485	0.057289124	0.034658269	0.057289124	0.000763576	0.021257757
471	ENSG00000089041	P2RX7	1.00E-06	3.70E-05	-0.97113551	0.198562817	7.239813004	0.296184379	0.022826018	-0.006259611	0.03631477	0.03631477	0.0002328	0.020744939
472	ENSG00000171793	CTPS1	1.01E-06	3.70E-05	0.628127178	0.12843423	12.45605987	0.138157547	0.002406031	0.022336996	0.009372888	0.022336996	0.000767136	0.02128865
473	ENSG00000119669	IRF2BPL	1.02E-06	3.76E-05	-0.49340914	0.100962998	11.7257059	0.085268006	0.000624765	0.014665525	0.009858417	0.014665525	0.00077029	0.021308093
474	ENSG00000140988	RPS2	1.03E-06	3.78E-05	-0.44013461	0.090084321	16.30157032	0.061539088	9.42E-05	0.004185193	0.012078538	0.012078538	0.000263068	0.020744939
475	ENSG00000232126	HLA-B	1.03E-06	3.78E-05	-1.319991698	0.270192886	10.45572502	0.61031846	0.004020261	0.105486033	0.011797061	0.105486033	0.000771741	0.021314295
476	ENSG00000168887	C2orf68	1.06E-06	3.85E-05	-0.499210317	0.102277238	10.22488394	0.078063706	0.003322188	0.000803343	0.012368762	0.012368762	0.000229224	0.020744939
477	ENSG00000130816	DNMT1	1.06E-06	3.87E-05	0.461810492	0.094635614	11.00465712	0.070492134	0.002705283	0.005434036	0.010728566	0.010728566	0.000402013	0.020744939
478	ENSG00000219481	NBPF1	1.08E-06	3.92E-05	0.478599427	0.098136498	11.50596252	0.075202339	0.00437434	0.003732054	0.010071819	0.010071819	0.000374775	0.020744939
479	ENSG00000078269	SYNJ2	1.09E-06	3.95E-05	0.715838178	0.146848591	13.69775554	0.1796047	0.000398528	0.031948236	0.009253261	0.031948236	0.000781162	0.02143815
480	ENSG00000131711	MAP1B	1.09E-06	3.95E-05	0.429663691	0.088147212	11.70945929	0.057789446	0.001781921	0.001225804	0.009872976	0.009872976	0.000229314	0.020744939
481	ENSG00000203797	DDO	1.10E-06	3.99E-05	-1.008270916	0.206943157	7.504764882	0.356373636	0.012500879	0.051737326	0.032226554	0.051737326	0.000783343	0.021464103
482	ENSG00000115966	ATF2	1.12E-06	4.04E-05	-0.423894997	0.087059735	11.59563335	0.062190508	0.001388901	0.008966621	0.009980195	0.009980195	0.000676608	0.020744939
483	ENSG00000012171	SEMA3B	1.16E-06	4.18E-05	-1.130616953	0.232552472	8.021987284	0.448385191	0.02571847	0.055402509	0.025603581	0.055402509	0.000792692	0.021550308
484	ENSG00000155961	RAB39B	1.18E-06	4.24E-05	-1.233034032	0.253773464	6.967366433	0.533393043	0.019663938	0.076937519	0.041025568	0.076937519	0.000795378	0.021589531
485	ENSG00000126091	ST3GAL3	1.19E-06	4.27E-05	-0.796088866	0.163905224	10.32040032	0.222365152	0.012223296	0.028074088	0.012120232	0.028074088	0.000797	0.021595004
486	ENSG00000100577	GSTZ1	1.20E-06	4.29E-05	-0.609422093	0.125503079	10.57183388	0.130319814	0.001597549	0.022028985	0.011542009	0.022028985	0.000798065	0.021595004
487	ENSG00000171954	CYP4F22	1.22E-06	4.34E-05	-1.420897551	0.292792928	5.526407496	0.629403419	0.049679577	-0.020031497	0.078911972	0.078911972	0.000225398	0.020744939
488	ENSG00000165171	METTL27	1.24E-06	4.40E-05	-0.89986567	0.1855534	7.170206605	0.278779392	0.014178186	0.030636719	0.03746691	0.03746691	0.000643697	0.020744939
489	ENSG00000143013	LMO4	1.24E-06	4.40E-05	-0.465318018	0.09595875	11.49424413	0.076005955	0.000890879	0.012921243	0.010084292	0.012921243	0.000804167	0.021726269
490	ENSG00000122986	HVCN1	1.27E-06	4.52E-05	-1.523075023	0.314443755	5.409837003	0.793568854	0.064943474	0.057108522	0.083368838	0.083368838	0.000601424	0.020744939
491	ENSG00000064300	NGFR	1.29E-06	4.54E-05	-1.478335831	0.305330899	5.173447397	0.674959666	0.046517242	-0.022371471	0.093323195	0.093323195	0.00020835	0.020744939
492	ENSG00000115641	FHL2	1.28E-06	4.54E-05	0.793354655	0.16384582	12.13780776	0.221038026	0.000518161	0.039750019	0.009544723	0.039750019	0.000810672	0.021797996
493	ENSG00000240065	PSMB9	1.32E-06	4.64E-05	-0.742342606	0.153469159	10.75526414	0.193585103	0.001187683	0.034141491	0.011170414	0.034141491	0.000815311	0.021797996
494	ENSG00000157557	ETS2	1.36E-06	4.78E-05	0.925967446	0.191683346	11.42316664	0.301315719	0.002283517	0.052830241	0.010162553	0.052830241	0.000821262	0.021797996
495	ENSG00000187741	FANCA	1.37E-06	4.81E-05	0.853544681	0.176747231	9.100365009	0.256049057	0.009339337	0.037520039	0.016937731	0.037520039	0.0008227	0.021797996
496	ENSG00000059804	SLC2A3	1.38E-06	4.84E-05	-0.723104252	0.149780449	9.112415529	0.183784947	0.002009411	0.031641863	0.016870186	0.031641863	0.000824038	0.021797996
497	ENSG00000180747	SMG1P3	1.39E-06	4.84E-05	0.75052342	0.155480191	10.267737	0.197994529	0.013737382	0.022523753	0.012254958	0.022523753	0.000824632	0.021797996
498	ENSG00000125966	MMP24	1.42E-06	4.96E-05	1.311748458	0.272048662	6.212697612	0.605017775	0.03361867	0.077397042	0.05753984	0.077397042	0.000829732	0.021797996
499	ENSG00000273802	HIST1H2BG	1.42E-06	4.96E-05	0.80682144	0.16733102	9.254995139	0.228887855	0.003529901	0.038469604	0.016104589	0.038469604	0.000829764	0.021797996
500	ENSG00000256043	CTSO	1.44E-06	5.01E-05	-1.448716249	0.300623386	8.295326086	0.738082935	0.007793081	0.127768549	0.022805987	0.127768549	0.000832302	0.021797996
501	ENSG00000102316	MAGED2	1.46E-06	5.06E-05	-0.666430869	0.138353232	13.15894382	0.156208971	0.00063151	0.028080915	0.009199321	0.028080915	0.000834364	0.021797996
502	ENSG00000060642	PIGV	1.47E-06	5.09E-05	-0.741821266	0.154066925	7.886134586	0.193573578	0.005357092	0.030247834	0.027171518	0.030247834	0.000836231	0.021797996
503	ENSG00000169258	GPRIN1	1.47E-06	5.09E-05	0.433481008	0.090027529	10.84606466	0.057945653	0.001158283	0.000809114	0.010999151	0.010999151	0.000211948	0.020744939
504	ENSG00000276849	TRBC2	1.49E-06	5.13E-05	1.909256407	0.396700302	7.366700214	1.139689417	0.201758747	-0.144119486	0.034297947	0.034297947	0.000242417	0.020744939
505	ENSG00000160949	TONSL	1.50E-06	5.17E-05	0.440905702	0.091647694	11.11266538	0.068398511	0.00083427	0.01176468	0.010563379	0.01176468	0.000840124	0.021797996
506	ENSG00000105851	PIK3CG	1.53E-06	5.22E-05	-1.020197521	0.212194011	8.096386211	0.346116382	0.042744011	-0.000399651	0.024795437	0.024795437	0.000453796	0.020744939
507	ENSG00000109323	MANBA	1.53E-06	5.22E-05	-0.923428637	0.19207372	10.16324914	0.300086911	0.003750973	0.051587498	0.012539545	0.051587498	0.000843211	0.021797996
508	ENSG00000144908	ALDH1L1	1.52E-06	5.22E-05	-1.367006367	0.284306609	7.132575526	0.644843492	0.083141465	0.022147998	0.038103907	0.038103907	0.000676201	0.020744939
509	ENSG00000115828	QPCT	1.57E-06	5.34E-05	-0.926227277	0.192858218	9.616800186	0.302002241	0.001488977	0.054302461	0.014431121	0.054302461	0.000848106	0.021849444
510	ENSG00000138772	ANXA3	1.57E-06	5.35E-05	0.680675139	0.141755862	8.717570622	0.163109263	0.008354771	0.021787316	0.019355081	0.021787316	0.000848974	0.021849444
511	ENSG00000157426	AASDH	1.57E-06	5.35E-05	-0.587034302	0.122250999	9.213482675	0.118232277	0.006096636	0.012465234	0.016321324	0.016321324	0.000636949	0.020744939
512	ENSG00000115718	PROC	1.58E-06	5.37E-05	-1.963235312	0.408959807	4.026210267	1.186294094	0.088667337	-0.051159554	0.162204849	0.162204849	0.00021175	0.020744939
513	ENSG00000138794	CASP6	1.64E-06	5.56E-05	-0.817738837	0.170611898	9.41845108	0.235539145	0.005907801	0.037754828	0.01529931	0.037754828	0.000857567	0.021930866
514	ENSG00000167107	ACSF2	1.66E-06	5.63E-05	-1.305106433	0.272440956	7.253602005	0.60005973	0.011258773	0.100077339	0.036090382	0.100077339	0.000860093	0.021930866
515	ENSG00000137573	SULF1	1.67E-06	5.63E-05	-1.555521001	0.324748954	6.579494298	0.852447935	0.045697716	0.112495108	0.048788614	0.112495108	0.000860589	0.021930866
516	ENSG00000111262	KCNA1	1.69E-06	5.68E-05	-1.669690645	0.34875463	4.97938588	0.982315805	0.047556001	0.134888688	0.102527904	0.134888688	0.000862907	0.021930866
517	ENSG00000154162	CDH12	1.69E-06	5.68E-05	-1.940359387	0.405353922	6.16456325	1.271227375	0.187659651	-0.010498388	0.058808053	0.058808053	0.000541267	0.020744939
518	ENSG00000184227	ACOT1	1.69E-06	5.68E-05	-0.649119786	0.135596576	8.473653698	0.142914876	0.006351123	0.014283786	0.021228524	0.021228524	0.000567932	0.020744939
519	ENSG00000132406	TMEM128	1.71E-06	5.70E-05	-0.572424759	0.11962384	9.958036333	0.115472867	0.00293135	0.018533444	0.013173662	0.018533444	0.000865268	0.021930866
520	ENSG00000138835	RGS3	1.71E-06	5.70E-05	-0.444807451	0.092950714	12.16107055	0.069723903	0.000718285	0.012241468	0.009530127	0.012241468	0.000865063	0.021930866
521	ENSG00000198933	TBKBP1	1.71E-06	5.70E-05	-1.006156741	0.210255289	8.200655372	0.35675416	0.015355361	0.050955569	0.023721939	0.050955569	0.00086507	0.021930866
522	ENSG00000116649	SRM	1.71E-06	5.71E-05	0.851721682	0.178018828	9.785017192	0.25565779	0.00207665	0.045459405	0.013777606	0.045459405	0.000866024	0.021930866
523	ENSG00000135314	KHDC1	1.74E-06	5.78E-05	-0.588826225	0.12314455	9.148335879	0.111723347	0.006075312	0.00356025	0.016671558	0.016671558	0.000336544	0.020744939
524	ENSG00000254772	EEF1G	1.75E-06	5.81E-05	-0.464230709	0.097120106	16.07024329	0.075971823	6.20E-05	0.014086429	0.011620896	0.014086429	0.000870506	0.021935234
525	ENSG00000160208	RRP1B	1.79E-06	5.92E-05	0.37843662	0.079241176	13.15522634	0.047154352	0.000219235	0.005018352	0.00919951	0.00919951	0.000420231	0.020744939
526	ENSG00000196372	ASB13	1.80E-06	5.94E-05	-0.662399051	0.138723911	10.05508262	0.154724939	0.010606088	0.018260398	0.012861656	0.018260398	0.000875558	0.021935234
527	ENSG00000010626	LRRC23	1.82E-06	5.99E-05	-0.780047204	0.163434099	8.627718141	0.214594938	0.006538531	0.033527526	0.020010744	0.033527526	0.000877671	0.021935234
528	ENSG00000139112	GABARAPL1	1.83E-06	6.01E-05	-0.905864904	0.189858087	8.794579207	0.289432679	0.01341686	0.04065228	0.018822256	0.04065228	0.000879273	0.021935234
529	ENSG00000160539	PLPP7	1.83E-06	6.01E-05	-1.057851693	0.22171599	9.383550333	0.394704638	0.004282992	0.069453979	0.015464259	0.069453979	0.000879346	0.021935234
530	ENSG00000108700	CCL8	1.85E-06	6.04E-05	-3.604827974	0.755845113	1.278278173	4.390709889	0.291190128	0.324152962	0.565762623	0.565762623	0.000552092	0.020744939
531	ENSG00000115107	STEAP3	1.85E-06	6.04E-05	0.416594345	0.087341853	11.41684127	0.05853742	0.001273159	0.006817048	0.01016974	0.01016974	0.000541873	0.020744939
532	ENSG00000144369	FAM171B	1.85E-06	6.04E-05	-0.771407308	0.161739361	9.348710312	0.209912315	0.001900961	0.03733847	0.01563283	0.03733847	0.000881128	0.021935234
533	ENSG00000123405	NFE2	1.86E-06	6.05E-05	-2.426428714	0.508856559	5.847467658	2.076988888	0.053052816	0.33534968	0.06797245	0.33534968	0.0008822	0.021935234
534	ENSG00000118960	HS1BP3	1.87E-06	6.06E-05	-0.712845418	0.149529403	9.026855022	0.179275428	0.004782111	0.028756453	0.017360036	0.028756453	0.000883356	0.021935234
535	ENSG00000275221	HIST1H2AK	1.86E-06	6.06E-05	0.485944528	0.10192721	11.57735045	0.083309612	0.000756849	0.014826885	0.009998341	0.014826885	0.000883045	0.021935234
536	ENSG00000104827	CGB3	1.91E-06	6.18E-05	1.936323102	0.406515699	5.282685858	1.323110163	0.125136558	0.122745962	0.088562461	0.122745962	0.000887488	0.021935234
537	ENSG00000118515	SGK1	1.91E-06	6.19E-05	0.737803832	0.15492686	8.011484532	0.169838235	0.010282972	-0.002118114	0.025720526	0.025720526	0.000251589	0.020744939
538	ENSG00000002586	CD99	1.93E-06	6.24E-05	-0.431153067	0.090572521	11.07018769	0.065611948	0.001125657	0.011179415	0.010626604	0.011179415	0.000890478	0.021935234
539	ENSG00000163485	ADORA1	1.97E-06	6.35E-05	-1.26857249	0.266712847	8.117635573	0.56814574	0.02424939	0.082454224	0.0245711	0.082454224	0.000894589	0.021950289
540	ENSG00000181026	AEN	1.97E-06	6.35E-05	0.667123282	0.14026545	8.080745615	0.151361095	0.004549202	0.017757115	0.024962393	0.024962393	0.000596806	0.020744939
541	ENSG00000151468	CCDC3	1.98E-06	6.35E-05	-0.810740774	0.17048	7.589663346	0.210678892	0.012578403	0.004282487	0.031016743	0.031016743	0.000327654	0.020744939
542	ENSG00000067221	STOML1	2.01E-06	6.43E-05	-0.600751855	0.12639991	9.283381751	0.118910396	0.008006256	0.005293192	0.01595915	0.01595915	0.000431459	0.020744939
543	ENSG00000250021	C15orf38-AP3S2	2.08E-06	6.66E-05	-0.608868526	0.128307711	8.330223438	0.127311068	0.002212076	0.017906429	0.022482227	0.022482227	0.000666092	0.020744939
544	ENSG00000188641	DPYD	2.10E-06	6.71E-05	-0.964569157	0.203342822	8.904385138	0.328736061	0.001183666	0.060838789	0.018105364	0.060838789	0.000907904	0.022069866
545	ENSG00000187446	CHP1	2.11E-06	6.71E-05	-0.502104389	0.105863018	9.952588435	0.08691945	0.003618748	0.010489758	0.01319172	0.01319172	0.000695661	0.020872232
546	ENSG00000011638	TMEM159	2.13E-06	6.76E-05	-0.628497624	0.132563441	9.76367308	0.139590458	0.008613321	0.017746278	0.013856706	0.017746278	0.000910489	0.022069866
547	ENSG00000198203	SULT1C2	2.13E-06	6.77E-05	-1.384017019	0.29195154	6.811052963	0.676933775	0.034642078	0.093211475	0.043991586	0.093211475	0.000911056	0.022069866
548	ENSG00000277956	MAPT	2.15E-06	6.81E-05	-1.302130892	0.274764577	6.597957704	0.599258146	0.063853432	0.049389927	0.048387085	0.049389927	0.000912634	0.022069866
549	ENSG00000050405	LIMA1	2.16E-06	6.84E-05	0.376680999	0.079508458	12.86006756	0.049852651	0.000243266	0.008864332	0.009239126	0.009239126	0.000855902	0.021930866
550	ENSG00000162687	KCNT2	2.17E-06	6.85E-05	-1.045123523	0.220623108	7.45762152	0.373345601	0.040092455	0.016983354	0.032919378	0.032919378	0.000637087	0.020744939
551	ENSG00000130813	C19orf66	2.19E-06	6.89E-05	-0.596616447	0.125991216	9.131004322	0.114804215	0.007043786	0.002979789	0.016766894	0.016766894	0.000355119	0.020744939
552	ENSG00000276903	HIST1H2AL	2.19E-06	6.90E-05	0.655831267	0.138515331	10.75227191	0.152058191	0.001195079	0.027584667	0.011176234	0.027584667	0.000917261	0.022069866
553	ENSG00000132669	RIN2	2.22E-06	6.99E-05	-0.621032018	0.131245251	9.506074074	0.136374609	0.002993193	0.022844781	0.014901735	0.022844781	0.000920328	0.022069866
554	ENSG00000144668	ITGA9	2.23E-06	6.99E-05	-2.476808903	0.523479497	4.905259508	2.169211643	0.091871215	0.31917496	0.106297246	0.31917496	0.000920765	0.022069866
555	ENSG00000168077	SCARA3	2.23E-06	7.00E-05	0.438957306	0.092784296	10.66372739	0.064399775	0.001561604	0.006681796	0.011351784	0.011351784	0.000507575	0.020744939
556	ENSG00000075702	WDR62	2.26E-06	7.03E-05	0.470390373	0.099475088	10.800906	0.078254483	0.001011637	0.013831303	0.011082806	0.013831303	0.000923667	0.022069866
557	ENSG00000115267	IFIH1	2.26E-06	7.03E-05	-0.840904024	0.177825597	10.17679524	0.250082205	0.00387487	0.043558045	0.012501261	0.043558045	0.000923572	0.022069866
558	ENSG00000133112	TPT1	2.25E-06	7.03E-05	-0.587853626	0.124294876	15.35051284	0.122210625	5.54E-05	0.023118404	0.01048902	0.023118404	0.000922827	0.022069866
559	ENSG00000144868	TMEM108	2.26E-06	7.03E-05	-1.13749804	0.240570309	6.307478854	0.444624735	0.031682633	0.038885115	0.055128477	0.055128477	0.000677703	0.020744939
560	ENSG00000185513	L3MBTL1	2.27E-06	7.03E-05	-0.878591668	0.185818913	8.934426374	0.243381501	0.033875539	-0.019119907	0.017917463	0.017917463	0.000288339	0.020744939
561	ENSG00000084072	PPIE	2.27E-06	7.04E-05	-0.481341256	0.101815066	10.72244056	0.08194639	0.00107731	0.014472152	0.011234636	0.014472152	0.000924871	0.022069866
562	ENSG00000176532	PRR15	2.28E-06	7.04E-05	-1.167030791	0.246875675	6.199189816	0.438170006	0.033528696	0.003448486	0.057892702	0.057892702	0.000349431	0.020744939
563	ENSG00000143341	HMCN1	2.30E-06	7.08E-05	-1.091363361	0.230950236	7.319228415	0.42132781	0.018965493	0.061041524	0.035039856	0.061041524	0.000927097	0.022076489
564	ENSG00000213741	RPS29	2.30E-06	7.09E-05	-0.41211983	0.087221418	15.14347006	0.060081917	0.000156965	0.011254398	0.010237162	0.011254398	0.00092769	0.022076489
565	ENSG00000283965	KCNH1	2.33E-06	7.17E-05	1.271819036	0.269321974	7.040199393	0.515765777	0.069089714	-0.030953866	0.039711774	0.039711774	0.000322541	0.020744939
566	ENSG00000179933	C14orf119	2.35E-06	7.22E-05	-0.386075244	0.081787965	13.31502137	0.04925819	0.000835604	0.004841848	0.009198303	0.009198303	0.000457023	0.020744939
567	ENSG00000198626	RYR2	2.36E-06	7.23E-05	-1.218133159	0.258081927	6.045718748	0.46759004	0.037837208	-0.009792805	0.062072214	0.062072214	0.000289494	0.020744939
568	ENSG00000198719	DLL1	2.41E-06	7.37E-05	-0.783499175	0.166152895	8.116442174	0.204805828	0.016826553	0.008979123	0.024583624	0.024583624	0.000504617	0.020744939
569	ENSG00000102317	RBM3	2.43E-06	7.38E-05	0.68469126	0.145246628	11.61938707	0.165956536	0.001021261	0.030623613	0.009957013	0.030623613	0.000939631	0.022175554
570	ENSG00000174599	TRAM1L1	2.43E-06	7.38E-05	-0.712428542	0.151135797	8.017655094	0.173993897	0.008611312	0.018548149	0.025651732	0.025651732	0.000667002	0.020744939
571	ENSG00000276043	UHRF1	2.43E-06	7.38E-05	0.564884441	0.119831921	12.3275628	0.112959957	0.00061619	0.020923344	0.009435085	0.020923344	0.00093965	0.022175554
572	ENSG00000278032	LY6E	2.43E-06	7.38E-05	-0.874248502	0.185461731	11.78552571	0.270568397	0.000546475	0.051047605	0.009806274	0.051047605	0.000939727	0.022175554
573	ENSG00000147459	DOCK5	2.50E-06	7.57E-05	0.910651072	0.193410523	7.813570682	0.293674769	0.010271158	0.045840288	0.028058554	0.045840288	0.000945787	0.022202992
574	ENSG00000116983	HPCAL4	2.50E-06	7.58E-05	-1.07580993	0.228518857	6.4846683	0.372963069	0.027424919	0.00476629	0.050906384	0.050906384	0.000361893	0.020744939
575	ENSG00000151470	C4orf33	2.53E-06	7.64E-05	-0.938854853	0.199509902	6.912664535	0.291096969	0.017666075	0.015661973	0.042040227	0.042040227	0.000459679	0.020744939
576	ENSG00000109472	CPE	2.55E-06	7.67E-05	-1.386789559	0.294789185	8.629035605	0.681236381	0.00141072	0.128940276	0.020000853	0.128940276	0.000950253	0.022219278
577	ENSG00000163961	RNF168	2.55E-06	7.67E-05	-0.404798722	0.086045771	11.49739492	0.057048671	0.001024886	0.008837701	0.010080926	0.010080926	0.00078923	0.021523548
578	ENSG00000121691	CAT	2.56E-06	7.69E-05	-0.496095308	0.105475535	9.363994051	0.081023741	0.00112924	0.007858978	0.015558393	0.015558393	0.000446696	0.020744939
579	ENSG00000162909	CAPN2	2.57E-06	7.70E-05	0.652629235	0.138777278	11.89167034	0.150888435	0.000251149	0.02863755	0.009719352	0.02863755	0.000952065	0.022219278
580	ENSG00000180900	SCRIB	2.57E-06	7.71E-05	0.456670772	0.097116682	11.18617285	0.068885183	0.003688428	0.004212478	0.010459047	0.010459047	0.00046189	0.020744939
581	ENSG00000178078	STAP2	2.58E-06	7.72E-05	-0.6943197	0.147677327	9.498603769	0.170794265	0.005499252	0.027213638	0.014934736	0.027213638	0.000953299	0.022219278
582	ENSG00000148290	SURF1	2.59E-06	7.73E-05	-0.666987605	0.141887191	10.78105862	0.15762011	0.001185006	0.029012957	0.011120553	0.029012957	0.000954155	0.022219278
583	ENSG00000172456	FGGY	2.61E-06	7.78E-05	-0.865511862	0.184177193	8.363830333	0.263561341	0.028704434	0.019830699	0.022177424	0.022177424	0.000885361	0.021935234
584	ENSG00000170315	UBB	2.65E-06	7.87E-05	-0.388246541	0.082666356	15.03293538	0.052717247	0.000135513	0.00923528	0.010115076	0.010115076	0.000831772	0.021797996
585	ENSG00000013364	MVP	2.68E-06	7.94E-05	-0.525493996	0.111947384	9.810737294	0.097881842	0.001563985	0.01723434	0.013683685	0.01723434	0.000961664	0.02222942
586	ENSG00000100271	TTLL1	2.68E-06	7.94E-05	-0.957146027	0.203903078	9.639462356	0.324730313	0.003793749	0.058570949	0.014338919	0.058570949	0.000961656	0.02222942
587	ENSG00000185261	KIAA0825	2.70E-06	7.98E-05	-0.653611059	0.139283739	9.228128046	0.143875148	0.012855637	0.006785516	0.016244303	0.016244303	0.000564531	0.020744939
588	ENSG00000005486	RHBDD2	2.71E-06	7.99E-05	-0.624232754	0.13306166	9.309734467	0.138146446	0.002181518	0.02437659	0.015826083	0.02437659	0.000964827	0.02222942
589	ENSG00000008382	MPND	2.71E-06	7.99E-05	-0.698898167	0.148968916	9.040459602	0.155513509	0.016007087	-0.004787194	0.017280519	0.017280519	0.000328398	0.020744939
590	ENSG00000186470	BTN3A2	2.71E-06	7.99E-05	-0.606868632	0.129351259	9.457803174	0.130564959	0.002981174	0.022116449	0.015117886	0.022116449	0.000964457	0.02222942
591	ENSG00000121361	KCNJ8	2.72E-06	8.00E-05	-1.222797776	0.260675977	5.854220485	0.51433062	0.034166465	0.048033909	0.067761483	0.067761483	0.000701308	0.020891804
592	ENSG00000277656	GSTT1	2.73E-06	8.02E-05	-0.931911834	0.198700034	8.370056554	0.307915944	0.010672621	0.048549934	0.022121702	0.048549934	0.00096625	0.022232712
593	ENSG00000161847	RAVER1	2.74E-06	8.04E-05	0.397220778	0.084710088	11.72072898	0.055149999	0.00090084	0.00886753	0.009862859	0.009862859	0.000829897	0.021797996
594	ENSG00000115568	ZNF142	2.76E-06	8.08E-05	0.468913937	0.100032462	11.78643091	0.071650862	0.005204238	0.001904234	0.009805502	0.009805502	0.000410392	0.020744939
595	ENSG00000255690	TRIL	2.78E-06	8.13E-05	-1.353026097	0.288725937	5.953752102	0.649239086	0.03748636	0.08755764	0.064735321	0.08755764	0.000970608	0.022303433
596	ENSG00000123240	OPTN	2.86E-06	8.34E-05	-0.634919826	0.135653905	11.78270379	0.143019334	0.002590298	0.025012675	0.009808682	0.025012675	0.000977167	0.022394912
597	ENSG00000164879	CA3	2.90E-06	8.44E-05	-1.574991715	0.336690705	6.686922841	0.880212427	0.008394733	0.161646213	0.04649975	0.161646213	0.000980123	0.022433065
598	ENSG00000170917	NUDT6	2.92E-06	8.50E-05	-0.726550789	0.155377066	7.877500144	0.175021069	0.008937802	0.011885016	0.027275247	0.027275247	0.00049012	0.020744939
599	ENSG00000171772	SYCE1	2.96E-06	8.59E-05	-1.15262267	0.246635238	6.214779792	0.471556435	0.032715009	0.058528403	0.057485656	0.058528403	0.000985268	0.022462043
600	ENSG00000068079	IFI35	2.98E-06	8.64E-05	-0.880942795	0.188557421	7.00404042	0.273325736	0.012972036	0.037662556	0.040358815	0.040358815	0.000907623	0.022069866
601	ENSG00000141510	TP53	3.01E-06	8.69E-05	-0.382877325	0.081987858	13.12514782	0.050956919	0.000881688	0.007841318	0.009201325	0.009201325	0.000791827	0.021550308
602	ENSG00000178075	GRAMD1C	3.01E-06	8.69E-05	-1.057649359	0.226475128	7.168347987	0.363962326	0.039438343	-0.003968749	0.037498133	0.037498133	0.000411261	0.020744939
603	ENSG00000112297	CRYBG1	3.02E-06	8.71E-05	0.403735916	0.086465864	11.6351677	0.05029912	0.001272665	0.000475227	0.009941854	0.009941854	0.000254155	0.020744939
604	ENSG00000160326	SLC2A6	3.03E-06	8.71E-05	-0.461550005	0.098856271	11.14041536	0.069452138	0.004135594	0.002793926	0.01052325	0.01052325	0.000419632	0.020744939
605	ENSG00000107874	CUEDC2	3.04E-06	8.73E-05	-0.64869973	0.138971551	9.765411922	0.149419112	0.002466299	0.026503339	0.013850222	0.026503339	0.000991677	0.022517537
606	ENSG00000268916	CSAG3	3.05E-06	8.73E-05	-0.839152778	0.179776891	7.825532723	0.248025014	0.020569664	0.025395084	0.027909932	0.027909932	0.000910226	0.022069866
607	ENSG00000072042	RDH11	3.06E-06	8.76E-05	-0.389962809	0.083561282	11.50302438	0.0492156	0.000398797	0.004094081	0.010074935	0.010074935	0.000392371	0.020744939
608	ENSG00000153317	ASAP1	3.08E-06	8.77E-05	0.650688686	0.139462932	8.52961375	0.143616624	0.008403095	0.012344272	0.020771769	0.020771769	0.000618823	0.020744939
609	ENSG00000213689	TREX1	3.08E-06	8.77E-05	-0.834088486	0.17877958	8.728516418	0.247065647	0.015654013	0.032289194	0.019277756	0.032289194	0.000994477	0.022517537
610	ENSG00000231939	HLA-DQB1	3.07E-06	8.77E-05	-1.230427214	0.263694474	7.077253184	0.53762707	0.022115368	0.082186795	0.039059149	0.082186795	0.000993716	0.022517537
611	ENSG00000143995	MEIS1	3.11E-06	8.82E-05	-1.236531402	0.265151524	7.231230268	0.543069369	0.032564984	0.072893012	0.036455076	0.072893012	0.000996776	0.022517537
612	ENSG00000186350	RXRA	3.11E-06	8.82E-05	-0.394548451	0.084603163	12.12153596	0.055289778	0.000781655	0.009954888	0.009555126	0.009954888	0.000996741	0.022517537
613	ENSG00000163811	WDR43	3.13E-06	8.87E-05	0.566242262	0.121456818	10.8942013	0.1138912	0.00267354	0.019454098	0.010913294	0.019454098	0.000998418	0.022525353
614	ENSG00000178149	DALRD3	3.16E-06	8.93E-05	-0.666925933	0.143105964	10.51529623	0.15801224	0.00398773	0.026731246	0.011663936	0.026731246	0.00100044	0.022541691
615	ENSG00000130119	GNL3L	3.17E-06	8.97E-05	0.412945928	0.088630464	11.00477076	0.052425925	0.001054654	0.000531124	0.010728385	0.010728385	0.000249206	0.020744939
616	ENSG00000185008	ROBO2	3.19E-06	9.00E-05	-1.879841399	0.403559027	5.261530127	1.255572972	0.153656798	0.090633034	0.089462195	0.090633034	0.001003037	0.022541732
617	ENSG00000006757	PNPLA4	3.21E-06	9.02E-05	-0.96268318	0.206713632	8.169080721	0.323848829	0.040055991	0.017220456	0.024039798	0.024039798	0.000842602	0.021797996
618	ENSG00000103522	IL21R	3.21E-06	9.02E-05	-2.111802796	0.453472682	5.415634253	1.433040773	0.225315707	-0.106406384	0.083140504	0.083140504	0.000370805	0.020744939
619	ENSG00000053372	MRTO4	3.24E-06	9.10E-05	0.498056188	0.106996905	9.250355804	0.086037127	0.001043937	0.013479984	0.01612857	0.01612857	0.000781042	0.02143815
620	ENSG00000168671	UGT3A2	3.26E-06	9.14E-05	-2.247117224	0.48289224	5.5204836	1.794682644	0.093049988	0.256727385	0.079131788	0.256727385	0.001008596	0.022628066
621	ENSG00000171425	ZNF581	3.27E-06	9.14E-05	-0.492769463	0.105897684	10.00180543	0.080095342	0.003790772	0.005270252	0.013030708	0.013030708	0.000475663	0.020744939
622	ENSG00000206340	C4A	3.28E-06	9.15E-05	-1.516749754	0.325993011	7.661305082	0.817684677	0.117011733	0.042395431	0.030033661	0.042395431	0.001009484	0.022628066
623	ENSG00000250722	SELENOP	3.30E-06	9.21E-05	-2.52219251	0.542290004	3.837716031	2.249412585	0.263772357	0.162447727	0.177345315	0.177345315	0.000956586	0.02222942
624	ENSG00000164056	SPRY1	3.31E-06	9.22E-05	-2.023782744	0.435171889	5.402672464	1.455958466	0.148044099	0.136017761	0.08365202	0.136017761	0.001012063	0.022653971
625	ENSG00000137274	BPHL	3.33E-06	9.24E-05	-0.638167049	0.137257953	10.06567648	0.144784849	0.004874315	0.023385303	0.012828754	0.023385303	0.001013418	0.022653971
626	ENSG00000147041	SYTL5	3.33E-06	9.24E-05	-1.088870388	0.234187722	6.317743939	0.384971421	0.027391895	0.009207861	0.054873939	0.054873939	0.000411399	0.020744939
627	ENSG00000259207	ITGB3	3.36E-06	9.32E-05	0.562439752	0.121023963	8.929941783	0.105336233	0.004024902	0.009018461	0.017945297	0.017945297	0.000523487	0.020744939
628	ENSG00000173638	SLC19A1	3.37E-06	9.33E-05	0.626403627	0.134805274	9.367071117	0.139521406	0.004790328	0.022468365	0.015543499	0.022468365	0.001016607	0.022653971
629	ENSG00000120937	NPPB	3.40E-06	9.40E-05	3.073156207	0.661631705	4.488729894	3.358594538	0.191676777	0.464957993	0.130033425	0.464957993	0.001018902	0.022653971
630	ENSG00000214826	DDX12P	3.42E-06	9.42E-05	0.879715107	0.189424933	7.228677209	0.274290379	0.017325802	0.035325172	0.036496906	0.036496906	0.000983682	0.022462043
631	ENSG00000165475	CRYL1	3.54E-06	9.71E-05	-1.102782529	0.237827508	7.904997083	0.4327131	0.009862089	0.074980797	0.026946619	0.074980797	0.001028445	0.022653971
632	ENSG00000185745	IFIT1	3.53E-06	9.71E-05	-1.201209286	0.259030671	10.17598318	0.513387391	0.003381012	0.097264321	0.012503544	0.097264321	0.001027931	0.022653971
633	ENSG00000265972	TXNIP	3.53E-06	9.71E-05	-1.864371402	0.402063304	8.634628646	1.236750098	0.004648349	0.237834001	0.019958957	0.237834001	0.001028313	0.022653971
634	ENSG00000165300	SLITRK5	3.60E-06	9.86E-05	-1.120574591	0.241848066	7.994621183	0.446894808	0.008775594	0.078960137	0.025909783	0.078960137	0.00103272	0.022653971
635	ENSG00000092820	EZR	3.63E-06	9.90E-05	0.540886269	0.116785557	14.23249562	0.104134027	0.000123066	0.020335233	0.009469157	0.020335233	0.00103508	0.022653971
636	ENSG00000155506	LARP1	3.63E-06	9.90E-05	0.459223552	0.099156113	10.16287172	0.070947331	0.002207284	0.007394528	0.012540618	0.012540618	0.000585736	0.020744939
637	ENSG00000166920	C15orf48	3.64E-06	9.90E-05	-0.808048294	0.174480622	8.568161036	0.232414798	0.005119047	0.040546184	0.020466878	0.040546184	0.001035427	0.022653971
638	ENSG00000168067	MAP4K2	3.63E-06	9.90E-05	-0.676224689	0.145997053	8.909221116	0.156189108	0.013897824	0.009858624	0.018074885	0.018074885	0.00067931	0.020744939
639	ENSG00000026036	RTEL1-TNFRSF6B	3.71E-06	0.000100981	0.865475371	0.187058914	9.041627603	0.26670353	0.011641657	0.040844899	0.017273722	0.040844899	0.001040832	0.022671365
640	ENSG00000106603	COA1	3.78E-06	0.000102641	-0.376320648	0.081400959	12.32757865	0.049796054	0.000504097	0.008634509	0.009435077	0.009435077	0.000915604	0.022069866
641	ENSG00000133124	IRS4	3.80E-06	0.00010306	-1.950539238	0.422022835	4.359266641	1.309398056	0.12878004	0.081241284	0.13837487	0.13837487	0.000737451	0.021001637
642	ENSG00000204128	C2orf72	3.83E-06	0.000103759	-1.283776331	0.277864299	8.505568031	0.587074783	0.058910781	0.056902072	0.020965945	0.056902072	0.001048976	0.022700864
643	ENSG00000166821	PEX11A	3.85E-06	0.000103931	-0.733623328	0.158810484	7.991171796	0.19172588	0.011236547	0.026594608	0.025948722	0.026594608	0.001049803	0.022700864
644	ENSG00000123505	AMD1	3.87E-06	0.00010447	0.389446517	0.084330582	12.86067546	0.054034554	0.000847973	0.009819498	0.009238995	0.009819498	0.001051537	0.022700864
645	ENSG00000117448	AKR1A1	3.95E-06	0.000106435	-0.397728654	0.086202256	11.70466039	0.055744122	0.001268934	0.009090687	0.009877309	0.009877309	0.000940945	0.022175554
646	ENSG00000003989	SLC7A2	3.99E-06	0.000107291	0.514824456	0.111629204	10.04190525	0.094466561	0.004383645	0.014307974	0.01290297	0.014307974	0.00105925	0.022830392
647	ENSG00000164342	TLR3	4.04E-06	0.000108482	-0.762638078	0.165456389	8.709955699	0.207336031	0.011877701	0.029186024	0.019409194	0.029186024	0.001062536	0.022844516
648	ENSG00000109705	NKX3-2	4.22E-06	0.000113141	-1.041973272	0.226504812	6.520880515	0.350996095	0.02687015	0.004734356	0.050086494	0.050086494	0.000415208	0.020744939
649	ENSG00000113196	HAND1	4.24E-06	0.000113609	-1.181767741	0.256959409	6.022288037	0.442677449	0.036303207	-0.006672018	0.062739	0.062739	0.000349025	0.020744939
650	ENSG00000087087	SRRT	4.27E-06	0.000113675	0.689691028	0.150009653	11.08770024	0.16970559	0.003745604	0.03000874	0.01060027	0.03000874	0.001077316	0.022987735
651	ENSG00000114541	FRMD4B	4.27E-06	0.000113675	-1.311633412	0.285267287	6.681305903	0.613767572	0.018276856	0.103789282	0.046616636	0.103789282	0.001076976	0.022987735
652	ENSG00000122481	RWDD3	4.27E-06	0.000113675	-0.50473035	0.109772589	9.519351044	0.084505397	0.003231548	0.006867926	0.014843484	0.014843484	0.000526696	0.020744939
653	ENSG00000166145	SPINT1	4.27E-06	0.000113675	-1.46408519	0.318426273	6.035319574	0.764737982	0.035829365	0.116263572	0.062367181	0.116263572	0.001077017	0.022987735
654	ENSG00000103490	PYCARD	4.29E-06	0.000113989	-1.196523384	0.260297699	8.457948997	0.510806333	0.00703439	0.094597948	0.021359834	0.094597948	0.00107846	0.022987735
655	ENSG00000143437	ARNT	4.35E-06	0.000115462	-0.584449157	0.127226891	8.89916893	0.117032179	0.006141684	0.012055733	0.018138339	0.018138339	0.000719244	0.020929171
656	ENSG00000170043	TRAPPC1	4.37E-06	0.000115681	-0.651775803	0.141908329	9.111475036	0.136313617	0.013331519	-0.002243885	0.016875441	0.016875441	0.00039134	0.020744939
657	ENSG00000213928	IRF9	4.37E-06	0.000115681	-0.976681943	0.212658583	9.427669418	0.340440693	0.006096549	0.06173896	0.015256382	0.06173896	0.001083627	0.023039358
658	ENSG00000160752	FDPS	4.40E-06	0.000116037	-0.413067736	0.089958386	13.02285482	0.0608985	0.000332237	0.01180653	0.009211266	0.01180653	0.00108486	0.023039358
659	ENSG00000135829	DHX9	4.43E-06	0.000116654	0.376619316	0.082046034	11.82410247	0.046454436	0.000323468	0.004553786	0.009773859	0.009773859	0.000471506	0.020744939
660	ENSG00000196275	GTF2IRD2	4.44E-06	0.00011674	-0.535242639	0.116613888	10.41541367	0.102263963	0.006308273	0.014089925	0.011890136	0.014089925	0.001087304	0.023063053
661	ENSG00000137207	YIPF3	4.49E-06	0.000118108	-0.412485408	0.089922937	11.15448396	0.05920883	0.00162595	0.008581008	0.010503252	0.010503252	0.000841835	0.021797996
662	ENSG00000185187	SIGIRR	4.50E-06	0.000118108	-0.801318477	0.174700765	8.298606775	0.22925782	0.009851705	0.035928832	0.022775235	0.035928832	0.00109127	0.023082285
663	ENSG00000116774	OLFML3	4.52E-06	0.000118331	-1.387338327	0.30250993	9.547546991	0.687226999	0.003491639	0.133776748	0.014721454	0.133776748	0.001092197	0.023082285
664	ENSG00000123416	TUBA1B	4.52E-06	0.000118331	0.404228211	0.088148157	16.08217361	0.05720035	1.18E-05	0.010213426	0.011643303	0.011643303	0.000893787	0.021950289
665	ENSG00000204149	AGAP6	4.54E-06	0.000118516	0.569854147	0.124282761	8.893683702	0.114179879	0.004996179	0.015953514	0.018173128	0.018173128	0.000934583	0.022175554
666	ENSG00000155368	DBI	4.57E-06	0.00011909	-0.403423739	0.088010435	12.007334	0.058120218	0.000559893	0.011058861	0.00963266	0.011058861	0.001095154	0.023116665
667	ENSG00000271254	AC240274.1	4.58E-06	0.000119326	0.424266184	0.092572087	10.69055921	0.055940257	0.001556523	0.000868126	0.011297864	0.011297864	0.000300208	0.020744939
668	ENSG00000248487	ABHD14A	4.59E-06	0.000119392	-0.649861007	0.141808609	8.349490164	0.134329686	0.007857873	0.001684486	0.02230665	0.02230665	0.000366358	0.020744939
669	ENSG00000127511	SIN3B	4.67E-06	0.000121282	0.511542476	0.111713323	9.279916305	0.082180445	0.002743012	0.001854155	0.015976787	0.015976787	0.00032969	0.020744939
670	ENSG00000009709	PAX7	4.74E-06	0.000122795	-0.89729879	0.196081263	7.025119055	0.277391949	0.0176914	0.027119117	0.039980393	0.039980393	0.000768416	0.021290139
671	ENSG00000164093	PITX2	4.82E-06	0.000124681	-0.764402315	0.16716818	7.826629865	0.198363487	0.014021452	0.014816319	0.027896348	0.027896348	0.000668623	0.020744939
672	ENSG00000204970	PCDHA1	4.83E-06	0.000124833	-1.075571119	0.235247319	6.512964005	0.413465531	0.031163658	0.051848294	0.050264541	0.051848294	0.001110551	0.023345859
673	ENSG00000019582	CD74	4.89E-06	0.000126006	-3.186243341	0.697295713	1.876709324	3.606386694	0.294180457	0.406747924	0.43515151	0.43515151	0.001045177	0.022700864
674	ENSG00000038945	MSR1	4.89E-06	0.000126006	-0.729786351	0.159712199	7.626835652	0.172091079	0.007759637	0.007633669	0.030502343	0.030502343	0.00042655	0.020744939
675	ENSG00000155100	OTUD6B	4.90E-06	0.000126006	0.554150063	0.121279634	10.19445226	0.109775187	0.003753672	0.018309452	0.012452001	0.018309452	0.001114386	0.023345859
676	ENSG00000118898	PPL	4.93E-06	0.000126453	-1.527114892	0.334319504	5.2683788	0.833747405	0.032800597	0.134853699	0.089169781	0.134853699	0.001116198	0.023345859
677	ENSG00000166387	PPFIBP2	4.93E-06	0.000126453	-1.252035904	0.274093751	6.630475866	0.532004433	0.065002853	0.012154975	0.047688224	0.047688224	0.000669066	0.020744939
678	ENSG00000196208	GREB1	4.95E-06	0.000126778	-1.026685444	0.224806072	8.234454334	0.332798791	0.052418081	-0.031700718	0.023388574	0.023388574	0.000349794	0.020744939
679	ENSG00000104549	SQLE	4.96E-06	0.000126982	-0.452592506	0.09911499	9.826683799	0.065881317	0.001109464	0.004427192	0.013626208	0.013626208	0.000410765	0.020744939
680	ENSG00000152049	KCNE4	4.98E-06	0.000127218	-1.051573523	0.23032344	6.190004028	0.356515345	0.021439325	0.009527278	0.058134005	0.058134005	0.000419885	0.020744939
681	ENSG00000167654	ATCAY	5.00E-06	0.000127634	-1.537415444	0.336809299	6.313425196	0.845222479	0.083278933	0.086881823	0.054980874	0.086881823	0.001120444	0.023350027
682	ENSG00000275714	HIST1H3A	5.05E-06	0.000128602	0.669792646	0.146795745	8.140505362	0.159087849	0.007990634	0.022635856	0.024332852	0.024332852	0.001030484	0.022653971
683	ENSG00000140545	MFGE8	5.10E-06	0.000129749	-0.597813494	0.131082771	8.588355611	0.127710634	0.005463824	0.020156604	0.020310215	0.020310215	0.001114945	0.023345859
684	ENSG00000197959	DNM3	5.14E-06	0.000130585	-0.945467398	0.207388202	9.581518084	0.31978442	0.011094849	0.05341995	0.014577396	0.05341995	0.001128119	0.023388857
685	ENSG00000278463	HIST1H2AB	5.15E-06	0.000130633	0.567285252	0.124444496	11.32510617	0.115127486	0.000811006	0.022418643	0.010278275	0.022418643	0.001128638	0.023388857
686	ENSG00000151090	THRB	5.17E-06	0.000130883	-1.313469645	0.288178508	7.175373916	0.617216975	0.075513483	0.049056796	0.037380232	0.049056796	0.001129591	0.023388857
687	ENSG00000159871	LYPD5	5.18E-06	0.000130925	-1.325633463	0.290871108	6.07460026	0.562508258	0.065647958	-0.021501664	0.061261045	0.061261045	0.000397868	0.020744939
688	ENSG00000169047	IRS1	5.20E-06	0.000131354	0.414611609	0.090994103	10.97647791	0.057470669	0.001645768	0.005729023	0.010774122	0.010774122	0.000587019	0.020744939
689	ENSG00000090013	BLVRB	5.22E-06	0.000131546	-0.921625284	0.202307249	10.41812022	0.303931817	0.00153554	0.059856794	0.011883807	0.059856794	0.001132645	0.023393159
690	ENSG00000175224	ATG13	5.22E-06	0.000131546	-0.508092389	0.111532635	9.96440455	0.092374797	0.005111863	0.01354743	0.013152629	0.01354743	0.001132677	0.023393159
691	ENSG00000105576	TNPO2	5.25E-06	0.000131898	0.489608181	0.107495557	9.605269087	0.077384293	0.002854383	0.003982419	0.014478559	0.014478559	0.000429497	0.020744939
692	ENSG00000105991	HOXA1	5.31E-06	0.000133255	-0.483438477	0.106201529	9.650561249	0.079497219	0.002623895	0.009105344	0.014294252	0.014294252	0.000691916	0.020795782
693	ENSG00000169228	RAB24	5.32E-06	0.000133255	-0.691895358	0.152000676	9.63173707	0.171340802	0.003504396	0.031151912	0.014370198	0.031151912	0.001137595	0.023393159
694	ENSG00000185477	GPRIN3	5.34E-06	0.000133686	-1.505069794	0.330716183	5.457292571	0.803230072	0.082539181	0.072035252	0.08152061	0.08152061	0.001036206	0.022653971
695	ENSG00000161653	NAGS	5.38E-06	0.000134571	-1.13178413	0.248784832	6.278577497	0.458553266	0.027454909	0.065385929	0.055851983	0.065385929	0.001141237	0.023398461
696	ENSG00000013392	RWDD2A	5.40E-06	0.000134894	-0.619602562	0.136223032	8.445463923	0.129785197	0.006369811	0.011896434	0.02146526	0.02146526	0.000655073	0.020744939
697	ENSG00000037474	NSUN2	5.46E-06	0.00013609	0.424835123	0.093446724	10.72602403	0.064624213	0.000907859	0.012190576	0.011227583	0.012190576	0.001145295	0.023407125
698	ENSG00000184602	SNN	5.49E-06	0.000136539	-0.701057493	0.154238368	9.084333121	0.175991852	0.004101169	0.031583042	0.017028315	0.031583042	0.00114666	0.023407485
699	ENSG00000137154	RPS6	5.52E-06	0.000137075	-0.375348508	0.082600233	15.08510459	0.048975244	6.26E-05	0.008324065	0.010171646	0.010171646	0.000856046	0.021930866
700	ENSG00000110628	SLC22A18	5.59E-06	0.000138583	-0.990636424	0.218141771	7.204913665	0.351511156	0.028045944	0.043332805	0.036888337	0.043332805	0.001152211	0.023430891
701	ENSG00000170454	KRT75	5.59E-06	0.000138583	1.087769473	0.239516739	6.264535504	0.403392654	0.029845207	0.030679702	0.056207196	0.056207196	0.00071251	0.020908324
702	ENSG00000137094	DNAJB5	5.66E-06	0.000140001	-0.511793543	0.112759569	9.818394218	0.091372288	0.005416065	0.010574558	0.013656015	0.013656015	0.000888511	0.021935234
703	ENSG00000167491	GATAD2A	5.69E-06	0.00014058	0.573269167	0.126336609	10.55912158	0.117744388	0.001294633	0.022646775	0.011569074	0.022646775	0.001157214	0.023430891
704	ENSG00000128739	SNRPN	5.73E-06	0.000141326	-0.462681391	0.101997198	13.82974622	0.076706335	0.000157482	0.01544766	0.009291293	0.01544766	0.001159179	0.023430891
705	ENSG00000109854	HTATIP2	5.75E-06	0.000141772	-0.50572821	0.111510508	10.57671337	0.091649819	0.001556857	0.017095033	0.011531671	0.017095033	0.001160521	0.023430891
706	ENSG00000108176	DNAJC12	5.78E-06	0.000142223	-1.482069108	0.326858613	6.859256819	0.787162515	0.015775282	0.144479548	0.043054845	0.144479548	0.00116187	0.023430891
707	ENSG00000129946	SHC2	5.81E-06	0.000142689	-2.31591763	0.510868695	6.599933635	1.922226529	0.032042127	0.359438108	0.048344318	0.359438108	0.001163248	0.023430891
708	ENSG00000090661	CERS4	5.91E-06	0.000144941	-0.970740629	0.214313851	8.737260678	0.337817722	0.004752678	0.064142962	0.019216369	0.064142962	0.001168512	0.023467504
709	ENSG00000136155	SCEL	5.92E-06	0.000144941	-2.789059912	0.615769532	3.463303114	2.72836447	0.357337233	0.136047659	0.211420942	0.211420942	0.000942065	0.022175554
710	ENSG00000125457	MIF4GD	5.95E-06	0.000145686	-0.601607915	0.13286371	8.662230236	0.120394606	0.006724739	0.008043987	0.019754409	0.019754409	0.000574911	0.020744939
711	ENSG00000178343	SHISA3	5.98E-06	0.000145855	-1.050233341	0.231984622	9.233586914	0.395477259	0.003792292	0.076933006	0.016215751	0.076933006	0.001171826	0.023471746
712	ENSG00000196549	MME	5.97E-06	0.000145855	-0.910939412	0.201206995	8.403118271	0.297524289	0.017179107	0.043547275	0.021829715	0.043547275	0.001171535	0.023471746
713	ENSG00000084774	CAD	6.05E-06	0.000147464	0.499393269	0.110374106	9.937666514	0.089437023	0.004618803	0.013654862	0.013241486	0.013654862	0.001175512	0.023471746
714	ENSG00000173376	NDNF	6.14E-06	0.000149375	-1.23268413	0.272625408	5.360744113	0.545042585	0.012758246	0.098728674	0.085331527	0.098728674	0.001179784	0.023471746
715	ENSG00000135333	EPHA7	6.18E-06	0.000150162	-1.519472276	0.336157394	5.558817659	0.828240952	0.052927101	0.116575589	0.077721584	0.116575589	0.001181782	0.023471746
716	ENSG00000165816	VWA2	6.19E-06	0.000150178	-2.281241475	0.504721345	3.930089481	1.76450625	0.212348057	0.041761254	0.169767396	0.169767396	0.000688738	0.020772161
717	ENSG00000141469	SLC14A1	6.20E-06	0.000150187	-2.730971766	0.604264826	5.087448547	2.675625212	0.223542093	0.324161876	0.097279422	0.324161876	0.001182672	0.023471746
718	ENSG00000162664	ZNF326	6.26E-06	0.000151436	0.655944911	0.145202562	9.890280573	0.154379659	0.003811571	0.027814106	0.013402549	0.027814106	0.001185586	0.023484609
719	ENSG00000100290	BIK	6.31E-06	0.00015241	-0.967007978	0.214139119	7.252720814	0.335558004	0.014114796	0.054668547	0.036104684	0.054668547	0.001187946	0.023504548
720	ENSG00000080815	PSEN1	6.57E-06	0.00015842	-0.461254245	0.102341691	9.66168776	0.076285336	0.001460938	0.014112427	0.014249795	0.014249795	0.001183586	0.023471746
721	ENSG00000179361	ARID3B	6.57E-06	0.00015842	0.561228201	0.124517218	8.722480641	0.109975293	0.003936478	0.015416228	0.019320328	0.019320328	0.000914357	0.022069866
722	ENSG00000215271	HOMEZ	6.59E-06	0.000158539	-0.547784166	0.121552915	10.30350735	0.107750381	0.005617831	0.016544836	0.012162856	0.016544836	0.001201232	0.023606112
723	ENSG00000016082	ISL1	6.63E-06	0.000159321	-0.689900426	0.153133928	7.668806343	0.152927504	0.005242275	0.007431132	0.029932725	0.029932725	0.000434751	0.020744939
724	ENSG00000156869	FRRS1	6.67E-06	0.000160086	-0.616936462	0.136978318	8.02113543	0.133410005	0.00253155	0.021501982	0.025613039	0.025613039	0.000950952	0.022219278
725	ENSG00000109475	RPL34	6.70E-06	0.000160427	-0.360454692	0.080044928	14.16314618	0.046262838	0.000178994	0.00892671	0.009431792	0.009431792	0.001107315	0.023345004
726	ENSG00000185352	HS6ST3	6.73E-06	0.000161138	-0.925041517	0.205477045	6.820483714	0.272398334	0.019524501	8.52E-05	0.043806723	0.043806723	0.000403747	0.020744939
727	ENSG00000198517	MAFK	6.75E-06	0.000161232	0.48655412	0.108086978	10.01583022	0.085039828	0.003453319	0.014070873	0.012985686	0.014070873	0.001208552	0.023700156
728	ENSG00000134802	SLC43A3	6.79E-06	0.000162009	0.623331964	0.138513782	10.47539542	0.139586102	0.000974044	0.027805058	0.011752541	0.027805058	0.001210537	0.023708503
729	ENSG00000167771	RCOR2	6.80E-06	0.000162009	-0.912263948	0.202729822	6.405547744	0.296569581	0.008901587	0.049725823	0.052747484	0.052747484	0.001118107	0.023345859
730	ENSG00000076864	RAP1GAP	6.86E-06	0.000163343	-1.466114208	0.325957888	7.292225124	0.772345515	0.02346225	0.135910567	0.035468626	0.135910567	0.001213869	0.02374699
731	ENSG00000109819	PPARGC1A	6.87E-06	0.00016336	-1.691414955	0.376074661	4.856040709	0.930135838	0.103276164	-0.013438072	0.108872062	0.108872062	0.000484499	0.020744939
732	ENSG00000167740	CYB5D2	6.90E-06	0.000163858	-1.055938322	0.23482968	8.767510731	0.400675696	0.005912256	0.076805212	0.019006605	0.076805212	0.0012157	0.02375607
733	ENSG00000140015	KCNH5	7.02E-06	0.000166101	-0.872301206	0.194140688	7.684776666	0.273501546	0.014087904	0.042448006	0.029719088	0.042448006	0.001220806	0.023761104
734	ENSG00000161249	DMKN	7.01E-06	0.000166101	-0.580266364	0.129138356	10.2111466	0.121024774	0.003699397	0.021315675	0.012406082	0.021315675	0.001220467	0.023761104
735	ENSG00000188976	NOC2L	7.10E-06	0.000167794	0.358522171	0.079836769	13.08908318	0.042633185	0.000356699	0.004732976	0.009204165	0.009204165	0.000579609	0.020744939
736	ENSG00000145425	RPS3A	7.14E-06	0.000168514	-0.518371312	0.115463328	15.0148653	0.096610781	7.59E-05	0.019921749	0.010095917	0.019921749	0.001226198	0.023761104
737	ENSG00000149591	TAGLN	7.16E-06	0.000168795	0.581554699	0.12955555	10.83304069	0.121603329	0.002847668	0.022329293	0.011022964	0.022329293	0.001227152	0.023761104
738	ENSG00000157212	PAXIP1	7.17E-06	0.00016887	0.4202535	0.093629762	10.83431265	0.05542656	0.002129172	0.000924151	0.011020627	0.011020627	0.000365043	0.020744939
739	ENSG00000130513	GDF15	7.23E-06	0.000170053	-1.169081825	0.260566993	5.547165746	0.435302056	0.023695563	0.007899889	0.078147174	0.078147174	0.000412498	0.020744939
740	ENSG00000149257	SERPINH1	7.33E-06	0.000171774	-0.354822124	0.079131391	12.71088353	0.043768686	0.000114945	0.007383884	0.00927772	0.00927772	0.00089145	0.021935234
741	ENSG00000167721	TSR1	7.32E-06	0.000171774	0.407787915	0.090938976	10.57056266	0.057356288	0.00086014	0.008476102	0.011544706	0.011544706	0.000828329	0.021797996
742	ENSG00000228163	HLA-DPA1	7.34E-06	0.000171787	-0.809835766	0.18061944	9.68803187	0.235898249	0.016998098	0.031936975	0.014145791	0.031936975	0.001234865	0.023761104
743	ENSG00000179873	NLRP11	7.46E-06	0.000174524	-0.790086419	0.176358692	9.599783231	0.224593831	0.002861121	0.043792462	0.014501252	0.043792462	0.001240342	0.023761104
744	ENSG00000163739	CXCL1	7.49E-06	0.000174785	-1.656261079	0.369751308	7.809013464	0.987019464	0.008114925	0.19695912	0.028115424	0.19695912	0.00124125	0.023761104
745	ENSG00000137628	DDX60	7.50E-06	0.000174837	-1.037753891	0.231691062	6.991776674	0.387496839	0.026965353	0.053555769	0.040580589	0.053555769	0.001241776	0.023761104
746	ENSG00000163818	LZTFL1	7.55E-06	0.000175893	-0.593881015	0.13263903	8.607544876	0.119347684	0.006226407	0.0106977	0.020163261	0.020163261	0.000700037	0.020891804
747	ENSG00000213347	MXD3	7.56E-06	0.000175893	-0.962402485	0.21495717	9.487162535	0.333313465	0.007566246	0.061743632	0.014985596	0.061743632	0.001244572	0.023761104
748	ENSG00000118096	IFT46	7.60E-06	0.000176461	-0.567061471	0.126683432	8.737905298	0.099530775	0.004861181	-0.001032229	0.019211857	0.019211857	0.000332108	0.020744939
749	ENSG00000142700	DMRTA2	7.65E-06	0.000177121	0.465330321	0.103988137	9.834318714	0.072764779	0.002621409	0.007134949	0.01359889	0.01359889	0.000659572	0.020744939
750	ENSG00000197646	PDCD1LG2	7.64E-06	0.000177121	1.015036883	0.226822749	8.980221799	0.370828234	0.004466229	0.07270661	0.01763746	0.07270661	0.001247829	0.023761104
751	ENSG00000106526	ACTR3C	7.70E-06	0.000178163	-1.568794621	0.350701706	5.943117349	0.885924993	0.091053096	0.093434434	0.065051363	0.093434434	0.001250431	0.023761104
752	ENSG00000170430	MGMT	7.86E-06	0.000181525	-0.779883716	0.174508864	8.165014582	0.219009596	0.002752376	0.042927639	0.024081185	0.042927639	0.001256931	0.023761104
753	ENSG00000064655	EYA2	7.88E-06	0.000181765	-0.831465489	0.186074536	7.930114955	0.248948937	0.007213194	0.044722405	0.026650756	0.044722405	0.001257794	0.023761104
754	ENSG00000103710	RASL12	7.92E-06	0.000182238	-1.751197892	0.392011347	5.770294447	1.104415693	0.034175986	0.196333358	0.070436493	0.196333358	0.001259688	0.023761104
755	ENSG00000156304	SCAF4	7.92E-06	0.000182238	0.495229413	0.110857431	10.86358668	0.088322895	0.003995903	0.014438152	0.010967509	0.014438152	0.001259609	0.023761104
756	ENSG00000240024	LINC00888	7.93E-06	0.000182238	-0.621567902	0.139145149	8.55496389	0.139137644	0.004633004	0.024409054	0.020570388	0.024409054	0.00125994	0.023761104
757	ENSG00000185760	KCNQ5	8.00E-06	0.000183648	0.815720306	0.182687479	10.37569926	0.239669543	0.0140621	0.035999972	0.011984399	0.035999972	0.001262897	0.023761104
758	ENSG00000183023	SLC8A1	8.04E-06	0.00018425	-0.545704826	0.122242147	9.049492447	0.096782276	0.005186643	0.004118543	0.017228071	0.017228071	0.00049993	0.020744939
759	ENSG00000075131	TIPIN	8.09E-06	0.000185139	0.577495656	0.129401611	9.475711104	0.120144102	0.003791675	0.02132549	0.015036888	0.02132549	0.001266418	0.023761104
760	ENSG00000143891	GALM	8.11E-06	0.000185384	-0.862106403	0.193199849	7.547702118	0.267759653	0.022385676	0.033603596	0.031608611	0.033603596	0.001267286	0.023761104
761	ENSG00000113361	CDH6	8.15E-06	0.000185896	-2.159151889	0.48399562	7.202494754	1.679683177	0.076231023	0.275146617	0.036928391	0.275146617	0.001269061	0.023761104
762	ENSG00000162706	CADM3	8.15E-06	0.000185896	-1.82587163	0.409271976	9.176214448	1.201146422	0.016670602	0.234584723	0.016520133	0.234584723	0.001268801	0.023761104
763	ENSG00000119650	IFT43	8.18E-06	0.000186153	-0.490454611	0.109954561	9.458800776	0.086671724	0.002227174	0.015907834	0.015113349	0.015907834	0.00126995	0.023761104
764	ENSG00000162426	SLC45A1	8.37E-06	0.000190218	-1.428468529	0.320600136	6.369491717	0.626819045	0.100566832	-0.082238902	0.053609839	0.053609839	0.000321661	0.020744939
765	ENSG00000109452	INPP4B	8.51E-06	0.000193145	-0.7667188	0.172216992	6.961662301	0.192018503	0.003357802	0.016218683	0.041130237	0.041130237	0.000528004	0.020744939
766	ENSG00000106484	MEST	8.55E-06	0.000193874	1.368120711	0.307376463	13.1298466	0.674902632	0.000537985	0.14118245	0.009201009	0.14118245	0.001284775	0.023761104
767	ENSG00000168906	MAT2A	8.59E-06	0.000194537	0.692925955	0.155715496	11.37994652	0.173140693	0.00086346	0.035507514	0.010212412	0.035507514	0.001286357	0.023761104
768	ENSG00000106034	CPED1	8.62E-06	0.000194968	-1.195382874	0.268674093	6.329401272	0.512763499	0.053692244	0.05140955	0.054586409	0.054586409	0.001227824	0.023761104
769	ENSG00000188372	ZP3	8.73E-06	0.000197145	-1.083432417	0.243658063	6.929215367	0.423390843	0.036514705	0.052539173	0.041730643	0.052539173	0.001291717	0.023761104
770	ENSG00000167964	RAB26	8.77E-06	0.000197663	-1.53434309	0.345152608	5.353780712	0.714824755	0.093081298	-0.082378623	0.085614186	0.085614186	0.000298696	0.020744939
771	ENSG00000169100	SLC25A6	8.77E-06	0.000197663	-0.541933371	0.12190653	11.68236858	0.105940976	0.000306671	0.021985132	0.009897634	0.021985132	0.00129336	0.023761104
772	ENSG00000177469	CAVIN1	8.79E-06	0.000197909	0.659968617	0.148479069	13.6699844	0.157122813	0.000173266	0.032895785	0.009246513	0.032895785	0.00129434	0.023761104
773	ENSG00000042493	CAPG	8.84E-06	0.000198564	-0.562532857	0.126586255	12.00463598	0.11416186	0.000944757	0.023091363	0.009634588	0.023091363	0.001295899	0.023761104
774	ENSG00000116120	FARSB	8.89E-06	0.000198972	0.450933698	0.101502302	12.47939661	0.073365621	0.000358451	0.015095625	0.009362622	0.015095625	0.00129791	0.023761104
775	ENSG00000172403	SYNPO2	8.88E-06	0.000198972	-1.233158194	0.277570649	6.79774788	0.548658298	0.032395542	0.083172656	0.04425373	0.083172656	0.001297773	0.023761104
776	ENSG00000187134	AKR1C1	8.87E-06	0.000198972	-1.205263413	0.271277258	5.770580201	0.45114515	0.03995984	-0.020775863	0.070427186	0.070427186	0.0003557	0.020744939
777	ENSG00000104946	TBC1D17	8.93E-06	0.000199639	-0.487222964	0.109695404	9.815910087	0.079665981	0.004384645	0.006178	0.013664978	0.013664978	0.000671144	0.020744939
778	ENSG00000153832	FBXO36	9.04E-06	0.000201883	-0.527537683	0.118843795	9.02302576	0.100437419	0.003427676	0.017758095	0.017382531	0.017758095	0.001303735	0.023761104
779	ENSG00000127990	SGCE	9.05E-06	0.000201923	-0.532570545	0.119986203	10.30430402	0.102365443	0.004481061	0.017113972	0.012160834	0.017113972	0.00130424	0.023761104
780	ENSG00000173805	HAP1	9.10E-06	0.000202502	-2.590913786	0.583877215	4.612344468	2.191206273	0.388856177	-0.167161178	0.122512726	0.122512726	0.000532986	0.020744939
781	ENSG00000175182	FAM131A	9.09E-06	0.000202502	-0.590342889	0.133029445	10.31939136	0.125787618	0.004966583	0.021578667	0.012122762	0.021578667	0.00130569	0.023761104
782	ENSG00000150625	GPM6A	9.16E-06	0.000203599	-1.644401462	0.370695444	4.129320584	0.976114985	0.043849053	0.162273615	0.154444217	0.162273615	0.001308389	0.023761104
783	ENSG00000100316	RPL3	9.22E-06	0.000204522	-0.427921938	0.096493108	14.70475182	0.066108259	4.47E-05	0.01392169	0.009801029	0.01392169	0.001310382	0.023761104
784	ENSG00000089289	IGBP1	9.30E-06	0.000206089	-0.564973985	0.12745248	11.55991359	0.115251643	0.000739622	0.023626579	0.010015899	0.023626579	0.001313451	0.023761104
785	ENSG00000177239	MAN1B1	9.32E-06	0.000206162	-0.521456079	0.117644581	12.17793071	0.09818323	0.000855397	0.019904974	0.009519751	0.019904974	0.001314013	0.023761104
786	ENSG00000169302	STK32A	9.33E-06	0.000206275	-1.788228793	0.403474154	5.47495466	1.154678336	0.044910968	0.199276122	0.080844734	0.199276122	0.001314641	0.023761104
787	ENSG00000177697	CD151	9.35E-06	0.000206368	-0.361477442	0.081566209	12.50902908	0.042645525	0.00062953	0.003677648	0.009350039	0.009350039	0.000535472	0.020744939
788	ENSG00000156875	MFSD14A	9.38E-06	0.000206515	-0.441900409	0.099730146	11.87283608	0.070518114	0.000380234	0.014538919	0.009734257	0.014538919	0.001316432	0.023761104
789	ENSG00000157873	TNFRSF14	9.39E-06	0.000206515	-1.062829497	0.239876719	7.549089714	0.40793097	0.018174091	0.068137169	0.031588849	0.068137169	0.001316799	0.023761104
790	ENSG00000164236	ANKRD33B	9.38E-06	0.000206515	0.656766968	0.148223649	8.962827816	0.155767155	0.002829396	0.03012598	0.017742911	0.03012598	0.0013165	0.023761104
791	ENSG00000137460	FHDC1	9.45E-06	0.000207424	0.997030277	0.225091711	7.730633329	0.359020346	0.010573269	0.065426149	0.029115163	0.065426149	0.001318875	0.023761104
792	ENSG00000138650	PCDH10	9.46E-06	0.000207424	-0.624966941	0.141100264	8.576881586	0.14059754	0.009464955	0.019813091	0.020398972	0.020398972	0.001278041	0.023761104
793	ENSG00000126785	RHOJ	9.48E-06	0.000207733	-0.720975491	0.162798148	8.983398563	0.187745582	0.012294666	0.027460189	0.017618318	0.027460189	0.001320152	0.023761104
794	ENSG00000177674	AGTRAP	9.57E-06	0.000209382	-0.586556603	0.132505213	10.11443847	0.124283752	0.001619766	0.024716681	0.012681186	0.024716681	0.001323342	0.023761104
795	ENSG00000164764	SBSPON	9.61E-06	0.000210081	-2.349816628	0.53095066	7.324119974	1.99478178	0.021396387	0.401466518	0.034962709	0.401466518	0.001324941	0.023761104
796	ENSG00000153823	PID1	9.64E-06	0.000210213	-0.83633751	0.189002858	8.076601307	0.252704626	0.016127924	0.037455197	0.025006892	0.037455197	0.001326039	0.023761104
797	ENSG00000274070	CASTOR2	9.64E-06	0.000210213	-0.797810746	0.180291707	8.204540426	0.229956715	0.006066929	0.04269072	0.023683259	0.04269072	0.001325859	0.023761104
798	ENSG00000140319	SRP14	9.70E-06	0.000211155	-0.417538034	0.094385249	11.97078254	0.062991693	0.000601029	0.012761834	0.00965916	0.012761834	0.00132804	0.023761104
799	ENSG00000125170	DOK4	9.72E-06	0.000211171	-0.902049383	0.203927878	6.872518363	0.294011822	0.017652901	0.044726968	0.042800655	0.044726968	0.001328671	0.023761104
800	ENSG00000169583	CLIC3	9.72E-06	0.000211171	-1.856953925	0.419820728	4.565928827	1.245982696	0.102662949	0.161711216	0.125287247	0.161711216	0.001328943	0.023761104
801	ENSG00000112796	ENPP5	9.85E-06	0.000213648	-1.12909174	0.255426473	9.043656974	0.460745666	0.010281942	0.087582082	0.017261923	0.087582082	0.001333476	0.023761104
802	ENSG00000168488	ATXN2L	9.96E-06	0.000215811	0.571108937	0.129269508	9.603290161	0.117902352	0.002971476	0.022094432	0.014486736	0.022094432	0.001337467	0.023761104
803	ENSG00000166923	GREM1	1.00E-05	0.000216597	0.906968474	0.205339799	8.507896441	0.297374864	0.020065042	0.043181607	0.020947007	0.043181607	0.001339193	0.023761104
804	ENSG00000163702	IL17RC	1.01E-05	0.00021874	-0.813778525	0.184341473	8.800516223	0.239448781	0.015636716	0.035335952	0.018782238	0.035335952	0.001343124	0.023761104
805	ENSG00000175198	PCCA	1.01E-05	0.000218885	-0.747866023	0.169426443	9.456609219	0.201797117	0.027934658	0.014572893	0.015123321	0.015123321	0.001316373	0.023761104
806	ENSG00000196743	GM2A	1.02E-05	0.000219255	-0.618159817	0.140062079	8.121900104	0.138177331	0.001199538	0.028226541	0.024526423	0.028226541	0.001344844	0.023761104
807	ENSG00000105327	BBC3	1.03E-05	0.000221696	-1.387127633	0.314483977	8.258329656	0.695917127	0.011043206	0.137307052	0.023157352	0.137307052	0.001349233	0.023761104
808	ENSG00000174837	ADGRE1	1.04E-05	0.000223381	-0.715333964	0.162247799	9.865071969	0.185100022	0.002362178	0.037124345	0.013490154	0.037124345	0.001352385	0.023761104
809	ENSG00000224608	HLA-B	1.04E-05	0.000223855	-1.083533553	0.245801212	8.706621532	0.424715371	0.014116421	0.076510933	0.019432969	0.076510933	0.00135359	0.023761104
810	ENSG00000119917	IFIT3	1.05E-05	0.000224622	-0.816661314	0.185303224	10.34526331	0.241285452	0.00167681	0.049829118	0.012058475	0.049829118	0.001355261	0.023761104
811	ENSG00000180998	GPR137C	1.05E-05	0.00022484	-0.852983042	0.193565711	9.330898497	0.263235242	0.007381568	0.048819959	0.015720556	0.048819959	0.001356053	0.023761104
812	ENSG00000130294	KIF1A	1.05E-05	0.000224936	0.847153484	0.192268396	11.62824902	0.259661271	0.011749323	0.043701381	0.009948476	0.043701381	0.001357026	0.023761104
813	ENSG00000185127	C6orf120	1.05E-05	0.000224936	-0.440234384	0.099915712	12.34035538	0.070121673	0.000398709	0.014576016	0.009428461	0.014576016	0.001357094	0.023761104
814	ENSG00000113460	BRIX1	1.06E-05	0.000225259	0.377071519	0.085591458	12.34086448	0.051445956	0.001239263	0.009749584	0.009428199	0.009749584	0.001358053	0.023761104
815	ENSG00000239779	WBP1	1.07E-05	0.000227092	-0.741258035	0.168335456	10.29933611	0.198843233	0.001958782	0.040546457	0.012173466	0.040546457	0.001361421	0.023761104
816	ENSG00000168621	GDNF	1.08E-05	0.000230471	1.724543193	0.391942781	4.772729393	1.07655774	0.054782428	0.175646287	0.11336525	0.175646287	0.001367221	0.023761104
817	ENSG00000135925	WNT10A	1.09E-05	0.000231327	-2.01346972	0.45771945	3.938873652	1.467626607	0.053411701	0.260848941	0.169062798	0.260848941	0.001369015	0.023761104
818	ENSG00000140382	HMG20A	1.09E-05	0.000231583	-0.53208424	0.120971905	9.278234607	0.102495134	0.004321654	0.017629649	0.015985358	0.017629649	0.001369863	0.023761104
819	ENSG00000135828	RNASEL	1.10E-05	0.000232441	-0.752109487	0.171037253	9.970610484	0.204805094	0.002250217	0.041630396	0.013132209	0.041630396	0.001371658	0.023761104
820	ENSG00000137285	TUBB2B	1.11E-05	0.000234973	-0.379805771	0.086428302	13.73359848	0.052239549	0.000195309	0.011009468	0.009262614	0.011009468	0.001376514	0.023761104
821	ENSG00000137872	SEMA6D	1.11E-05	0.000234973	-1.150508553	0.261806526	7.553476924	0.446919526	0.071287534	-0.009014351	0.031526451	0.031526451	0.00073682	0.021001637
822	ENSG00000088002	SULT2B1	1.11E-05	0.000235109	-3.203012512	0.728939749	3.22332709	3.715410534	0.48623597	0.310793767	0.236377096	0.310793767	0.001377174	0.023761104
823	ENSG00000044524	EPHA3	1.12E-05	0.000235288	-1.711639393	0.389595386	4.522062115	1.05820409	0.099713094	0.124400989	0.127963753	0.127963753	0.00134407	0.023761104
824	ENSG00000133101	CCNA1	1.12E-05	0.000235288	-0.835675661	0.190212031	7.075855063	0.249760969	0.01518734	0.035131193	0.039083585	0.039083585	0.001226227	0.023761104
825	ENSG00000170099	SERPINA6	1.12E-05	0.000235367	-1.08434666	0.246832847	6.233229827	0.402224781	0.034381734	0.027471362	0.057007947	0.057007947	0.000825036	0.021797996
826	ENSG00000151702	FLI1	1.13E-05	0.000236958	-0.520275904	0.118478439	11.39385358	0.098050674	0.004785736	0.016269975	0.010196176	0.016269975	0.00138184	0.023761104
827	ENSG00000100767	PAPLN	1.13E-05	0.000237306	-0.575782545	0.131135925	9.83495573	0.120093619	0.011502377	0.014292569	0.013596616	0.014292569	0.001382827	0.023761104
828	ENSG00000244187	TMEM141	1.13E-05	0.000237994	-0.591220556	0.134679348	9.997731845	0.126628756	0.001672531	0.025535259	0.013043855	0.025535259	0.001384343	0.023763639
829	ENSG00000117640	MTFR1L	1.15E-05	0.00024159	-0.476044134	0.108529439	10.19858905	0.082119772	0.003555957	0.014112001	0.012440564	0.014112001	0.001390346	0.023796154
830	ENSG00000168569	TMEM223	1.16E-05	0.000242876	-0.534267408	0.121842663	8.741362048	0.095156415	0.003080758	0.008824137	0.019187693	0.019187693	0.000668202	0.020744939
831	ENSG00000006837	CDKL3	1.18E-05	0.000245179	-0.851188644	0.194255746	7.817171147	0.229689336	0.028589222	-0.013173342	0.02801372	0.02801372	0.00044943	0.020744939
832	ENSG00000125912	NCLN	1.18E-05	0.000245179	0.470586804	0.107391587	10.89291945	0.080275125	0.001575956	0.015723474	0.010915537	0.015723474	0.001397783	0.02382953
833	ENSG00000140264	SERF2	1.18E-05	0.000245179	-0.451404056	0.103013184	13.35508633	0.073863746	0.00028312	0.015634454	0.009200226	0.015634454	0.001397728	0.02382953
834	ENSG00000156976	EIF4A2	1.17E-05	0.000245179	-0.346619344	0.079092838	13.05297448	0.041372	0.000175782	0.006484855	0.009207734	0.009207734	0.000880862	0.021935234
835	ENSG00000161835	GRASP	1.19E-05	0.000247158	-1.283929584	0.293149245	6.22737257	0.597666329	0.04695566	0.08194906	0.057159135	0.08194906	0.00140155	0.023846943
836	ENSG00000127586	CHTF18	1.20E-05	0.000248897	0.568535555	0.12986217	9.160495274	0.113660216	0.008691051	0.012171964	0.016605224	0.016605224	0.001061929	0.022844516
837	ENSG00000228299	HLA-C	1.20E-05	0.000249225	-0.802989968	0.183438089	11.84030021	0.233817306	0.000801219	0.04967308	0.00976053	0.04967308	0.001405584	0.023892175
838	ENSG00000111371	SLC38A1	1.21E-05	0.000249969	0.359553876	0.082154939	12.04223643	0.039102122	0.000516031	-0.000117999	0.009608121	0.009608121	0.000319877	0.020744939
839	ENSG00000274646	RPS9	1.23E-05	0.000254048	-0.530857607	0.121401513	11.82567124	0.102228933	0.001858331	0.02024916	0.009772561	0.02024916	0.001413737	0.024007272
840	ENSG00000121871	SLITRK3	1.24E-05	0.000256975	-3.358935681	0.768638287	2.935562509	3.56464278	0.616291733	-0.3914066	0.269915492	0.269915492	0.000444267	0.020744939
841	ENSG00000001461	NIPAL3	1.25E-05	0.000258265	-0.497208805	0.113813481	9.881313225	0.089709189	0.002235465	0.017194797	0.013433557	0.017194797	0.001420917	0.024037964
842	ENSG00000001630	CYP51A1	1.26E-05	0.00026086	-0.517075137	0.118427226	11.31503112	0.097040019	0.000518717	0.020518795	0.010290701	0.020518795	0.001425201	0.024037964
843	ENSG00000173276	ZBTB21	1.27E-05	0.000262053	0.417557715	0.095662008	10.89555321	0.053060547	0.002815898	-0.001873132	0.010910931	0.010910931	0.000339693	0.020744939
844	ENSG00000184515	BEX5	1.28E-05	0.000263995	-1.066284416	0.244389426	6.802797477	0.412760166	0.02133768	0.068251607	0.044154055	0.068251607	0.001430709	0.024037964
845	ENSG00000221955	SLC12A8	1.28E-05	0.000264051	-0.893992909	0.204915059	7.341876523	0.290155214	0.009772841	0.053212431	0.034684012	0.053212431	0.001431249	0.024037964
846	ENSG00000197568	HHLA3	1.29E-05	0.000264699	-0.82258141	0.188580929	7.175051544	0.21035031	0.015958516	-0.006760695	0.037385634	0.037385634	0.000397829	0.020744939
847	ENSG00000162390	ACOT11	1.29E-05	0.000264882	-0.738693196	0.169365038	8.80783011	0.198121711	0.008284433	0.034742341	0.018733143	0.034742341	0.001433375	0.024037964
848	ENSG00000262102	DSEL	1.29E-05	0.000264918	-0.803556715	0.184248878	7.268908147	0.233319409	0.015078683	0.034431806	0.035842791	0.035842791	0.001371613	0.023761104
849	ENSG00000054965	FAM168A	1.30E-05	0.000265558	-0.485804074	0.111410921	10.15058377	0.085696551	0.001231787	0.017386803	0.012575737	0.017386803	0.001435275	0.024037964
850	ENSG00000198728	LDB1	1.30E-05	0.000265982	-0.425883143	0.097682653	11.11180653	0.065863216	0.001276655	0.013036196	0.010564635	0.013036196	0.001436348	0.024037964
851	ENSG00000099957	P2RX6	1.31E-05	0.000267008	-1.342135068	0.307916387	6.833030469	0.654172964	0.056145514	0.086073238	0.04356199	0.086073238	0.001438298	0.024037964
852	ENSG00000249242	TMEM150C	1.31E-05	0.000267232	-0.90490559	0.207626985	7.018431886	0.297386996	0.020771794	0.043891653	0.040100071	0.043891653	0.001439081	0.024037964
853	ENSG00000136352	NKX2-1	1.31E-05	0.000267547	-0.746601339	0.171329205	9.749938825	0.202448503	0.003125715	0.04090483	0.01390817	0.04090483	0.001440188	0.024037964
854	ENSG00000166197	NOLC1	1.32E-05	0.000267547	0.423572921	0.097204324	13.00770903	0.065162622	0.000669322	0.013503699	0.009213233	0.013503699	0.001440451	0.024037964
855	ENSG00000236271	FLOT1	1.33E-05	0.000269841	-0.673977538	0.154744335	12.84554125	0.165008687	0.001038122	0.034880592	0.009242334	0.034880592	0.001444236	0.024067004
856	ENSG00000153774	CFDP1	1.33E-05	0.000270683	-0.483920291	0.111131394	9.170858065	0.077768205	0.001976236	0.007416953	0.016549044	0.016549044	0.000666868	0.020744939
857	ENSG00000071539	TRIP13	1.34E-05	0.000271298	0.438501675	0.100718501	9.914495769	0.067569849	0.001896663	0.010459253	0.013319662	0.013319662	0.001073274	0.022987735
858	ENSG00000157368	IL34	1.36E-05	0.000274658	-1.605009161	0.368901313	5.106092318	0.930535357	0.107726704	0.08942209	0.096405564	0.096405564	0.001375175	0.023761104
859	ENSG00000172183	ISG20	1.36E-05	0.000275658	-1.184231965	0.272254191	5.852730359	0.496709804	0.043375544	0.051609706	0.067807973	0.067807973	0.001153301	0.023430891
860	ENSG00000140450	ARRDC4	1.37E-05	0.000277122	-0.677246865	0.155749365	8.854829384	0.166708433	0.004863217	0.03152358	0.018422912	0.03152358	0.001456981	0.024117947
861	ENSG00000168394	TAP1	1.38E-05	0.000277894	-0.489708899	0.112642863	11.80664605	0.087170539	0.000682356	0.018350266	0.00978841	0.018350266	0.001458539	0.024117947
862	ENSG00000011007	ELOA	1.38E-05	0.00027873	0.35034048	0.080602272	13.37665695	0.044617607	0.000284842	0.009460248	0.009201631	0.009460248	0.001460187	0.024117947
863	ENSG00000117153	KLHL12	1.39E-05	0.000279082	-0.386395369	0.088908241	11.62514775	0.052676073	0.001905556	0.007951517	0.009951457	0.009951457	0.001117418	0.023345859
864	ENSG00000145687	SSBP2	1.39E-05	0.000279682	-0.798576423	0.183780336	10.45819388	0.231847546	0.003323595	0.047339223	0.011791441	0.047339223	0.001462457	0.024117947
865	ENSG00000125650	PSPN	1.41E-05	0.00028302	-0.69233422	0.159435223	7.762584026	0.17430151	0.00676586	0.031363526	0.02870269	0.031363526	0.001467639	0.024117947
866	ENSG00000095383	TBC1D2	1.42E-05	0.000283462	0.459052682	0.105745768	9.723226342	0.068281106	0.002763696	0.003564176	0.014009555	0.014009555	0.000557122	0.020744939
867	ENSG00000114529	C3orf52	1.41E-05	0.000283462	0.544548701	0.125424345	8.509398936	0.09735909	0.002662098	0.007836781	0.020934801	0.020934801	0.000616979	0.020744939
868	ENSG00000128578	STRIP2	1.42E-05	0.000283462	0.472196726	0.108793456	10.45839189	0.073875509	0.005963033	0.002767698	0.011790991	0.011790991	0.00066394	0.020744939
869	ENSG00000131495	NDUFA2	1.42E-05	0.000283462	-0.411860827	0.09489217	10.29412402	0.061126953	0.001320015	0.011477673	0.01218677	0.01218677	0.001353163	0.023761104
870	ENSG00000141295	SCRN2	1.42E-05	0.000283462	-0.730044607	0.16818175	9.201164332	0.19383166	0.007001541	0.03542611	0.016386586	0.03542611	0.001470564	0.024117947
871	ENSG00000164125	FAM198B	1.42E-05	0.000283462	-1.166527052	0.268761444	5.378554984	0.494914865	0.022054998	0.086294073	0.084613404	0.086294073	0.00147134	0.024117947
872	ENSG00000185130	HIST1H2BL	1.42E-05	0.000283462	0.904503296	0.208353157	6.779638892	0.278475987	0.020503498	0.020794156	0.044613059	0.044613059	0.000825915	0.021797996
873	ENSG00000125648	SLC25A23	1.43E-05	0.000284251	-0.577427598	0.133064969	8.634093226	0.121274333	0.002722624	0.023836805	0.019962961	0.023836805	0.001473052	0.024117947
874	ENSG00000072954	TMEM38A	1.44E-05	0.000286044	-1.252402083	0.288729781	6.128763185	0.570591157	0.040855742	0.084191588	0.059771065	0.084191588	0.001476364	0.024117947
875	ENSG00000119820	YIPF4	1.44E-05	0.000286044	-0.470186833	0.108399013	9.590166117	0.076611509	0.003084288	0.009776726	0.014541231	0.014541231	0.000962852	0.02222942
876	ENSG00000140511	HAPLN3	1.45E-05	0.00028753	-0.867736645	0.20011841	7.521013059	0.273946919	0.018971	0.041100067	0.031991249	0.041100067	0.001479128	0.024117947
877	ENSG00000187601	MAGEH1	1.45E-05	0.00028753	-0.469623353	0.108310095	9.778285984	0.08024112	0.002470419	0.015126196	0.013802437	0.015126196	0.001479497	0.024117947
878	ENSG00000124762	CDKN1A	1.46E-05	0.000288518	-0.744679715	0.171786696	11.1928108	0.201777166	0.002721272	0.041544732	0.010449932	0.041544732	0.001481341	0.024117947
879	ENSG00000204397	CARD16	1.47E-05	0.000291119	-0.574310494	0.132553054	8.607294078	0.109043861	0.006190298	0.006427325	0.02016517	0.02016517	0.000657586	0.020744939
880	ENSG00000000971	CFH	1.48E-05	0.000292912	-1.353254745	0.312451842	9.575390324	0.666540906	0.004611562	0.141827668	0.014603145	0.141827668	0.00148838	0.024150465
881	ENSG00000087088	BAX	1.50E-05	0.000295003	-0.507500125	0.117238978	10.16088396	0.084566296	0.008071192	0.001053036	0.012546275	0.012546275	0.00062561	0.020744939
882	ENSG00000102401	ARMCX3	1.50E-05	0.000295003	-0.438097729	0.101204539	9.781139873	0.063456449	0.001571642	0.005775311	0.013791896	0.013791896	0.000660472	0.020744939
883	ENSG00000234487	HLA-F	1.50E-05	0.000295003	-1.657979057	0.383006361	7.975915827	1.000701013	0.04306242	0.176978389	0.026121866	0.176978389	0.001492495	0.024150465
884	ENSG00000133935	ERG28	1.50E-05	0.000295046	-0.481574424	0.111257037	10.72767502	0.084427931	0.001158481	0.017408711	0.011224337	0.017408711	0.00149318	0.024150465
885	ENSG00000104885	DOT1L	1.51E-05	0.000296809	0.704500122	0.162817798	7.457722521	0.1584455	0.006846575	0.005090142	0.032917878	0.032917878	0.000505876	0.020744939
886	ENSG00000076513	ANKRD13A	1.52E-05	0.00029735	0.722127187	0.166921541	10.15657094	0.189875663	0.001904754	0.039889448	0.01255858	0.039889448	0.001497515	0.024150465
887	ENSG00000128268	MGAT3	1.52E-05	0.00029735	-1.695850842	0.392011384	4.239601008	1.047180534	0.035055246	0.195454141	0.146530384	0.195454141	0.001497743	0.024150465
888	ENSG00000172638	EFEMP2	1.52E-05	0.000297973	-0.738644706	0.170782276	8.976491369	0.198678703	0.009254131	0.034495747	0.017659984	0.034495747	0.001499524	0.024150465
889	ENSG00000198816	ZNF358	1.52E-05	0.000297973	-0.428524747	0.099078425	9.937808071	0.064365934	0.001483789	0.010111081	0.013241012	0.013241012	0.001071034	0.022987735
890	ENSG00000100078	PLA2G3	1.53E-05	0.000298812	-1.804940627	0.417404581	8.249540237	1.1864151	0.008569726	0.252770149	0.023242064	0.252770149	0.001501138	0.024150465
891	ENSG00000166681	BEX3	1.54E-05	0.000300483	-0.677075703	0.156631811	11.62009346	0.166969681	0.000708349	0.036091937	0.00995633	0.036091937	0.001503893	0.024150465
892	ENSG00000205707	ETFRF1	1.55E-05	0.000301243	-0.473398038	0.109534276	9.385052238	0.076241049	0.002539556	0.008722117	0.015457081	0.015457081	0.000836147	0.021797996
893	ENSG00000130720	FIBCD1	1.56E-05	0.000302723	-0.555680457	0.128612211	9.782266534	0.112483552	0.01054793	0.014263721	0.01378774	0.014263721	0.00150788	0.024150465
894	ENSG00000182175	RGMA	1.56E-05	0.000302997	-1.284109601	0.297237812	6.692384631	0.600701621	0.027623041	0.104902435	0.046386382	0.104902435	0.001508716	0.024150465
895	ENSG00000089775	ZBTB25	1.57E-05	0.000305296	-0.561590984	0.130051291	9.410871962	0.114911336	0.005898735	0.019471272	0.015334803	0.019471272	0.001512308	0.024150465
896	ENSG00000133985	TTC9	1.58E-05	0.000305901	-0.474262654	0.109845482	9.561318653	0.081956755	0.00294117	0.015157875	0.014662667	0.015157875	0.001513592	0.024150465
897	ENSG00000168286	THAP11	1.58E-05	0.000306381	-0.376195024	0.08714369	11.18147733	0.048067946	0.00092551	0.006088412	0.010465524	0.010465524	0.000828724	0.021797996
898	ENSG00000225663	MCRIP1	1.59E-05	0.000306991	-0.456639322	0.105795004	11.07963856	0.075986941	0.000990298	0.015798577	0.010612346	0.015798577	0.001515997	0.024150465
899	ENSG00000118402	ELOVL4	1.60E-05	0.000308235	-0.61525352	0.142588748	9.906078582	0.137958929	0.002302142	0.028195185	0.013348334	0.028195185	0.001518606	0.024150465
900	ENSG00000178951	ZBTB7A	1.60E-05	0.000308235	0.456796359	0.105861951	10.1522039	0.075139467	0.004239044	0.011436698	0.012571085	0.012571085	0.0013638	0.023761104
901	ENSG00000115457	IGFBP2	1.60E-05	0.000308575	-1.047801098	0.242861824	9.648045069	0.400144381	0.002154854	0.086317944	0.014304351	0.086317944	0.00151953	0.024150465
902	ENSG00000113140	SPARC	1.61E-05	0.000309241	-0.420517768	0.097484895	13.26626545	0.064454524	0.000202236	0.014052721	0.009197167	0.014052721	0.001520892	0.024150465
903	ENSG00000170608	FOXA3	1.62E-05	0.000311635	-0.937487474	0.217427661	6.567272336	0.320394574	0.015073542	0.055838639	0.049056315	0.055838639	0.001524583	0.024150465
904	ENSG00000167077	MEI1	1.63E-05	0.000312428	-3.345404027	0.776031098	1.980724521	4.079531584	0.487819373	0.414697068	0.415517023	0.415517023	0.001523905	0.024150465
905	ENSG00000169180	XPO6	1.64E-05	0.00031393	0.533820931	0.123867579	9.696626626	0.103901248	0.0050279	0.017986866	0.014112239	0.017986866	0.001528591	0.024150465
906	ENSG00000174080	CTSF	1.66E-05	0.000317363	-1.322945398	0.307164577	8.03729504	0.638275451	0.005250018	0.136275098	0.025434405	0.136275098	0.001533639	0.024150465
907	ENSG00000113396	SLC27A6	1.66E-05	0.000317497	-1.043057706	0.242206719	6.856364998	0.396787728	0.027079956	0.060916186	0.043110474	0.060916186	0.00153456	0.024150465
908	ENSG00000164708	PGAM2	1.66E-05	0.000317497	-2.530087996	0.58752116	4.962405569	2.334620916	0.129921047	0.387850623	0.103380016	0.387850623	0.00153475	0.024150465
909	ENSG00000065609	SNAP91	1.68E-05	0.00032111	-1.165260411	0.270792865	6.477406114	0.487509233	0.05892066	0.041278946	0.051072503	0.051072503	0.001337895	0.023761104
910	ENSG00000146242	TPBG	1.68E-05	0.00032111	-0.367802883	0.085465135	11.53137879	0.049132439	0.000911264	0.009774674	0.01004517	0.01004517	0.001480837	0.024117947
911	ENSG00000197958	RPL12	1.68E-05	0.00032111	-0.384578735	0.089369129	15.90305563	0.05395445	3.47E-05	0.011945579	0.01132004	0.011945579	0.001540714	0.024150465
912	ENSG00000167508	MVD	1.70E-05	0.000323323	-0.561670947	0.130579302	9.369654745	0.115103421	0.003324744	0.022251687	0.015531017	0.022251687	0.001544331	0.024150465
913	ENSG00000007255	TRAPPC6A	1.70E-05	0.000323727	-1.414573	0.328904752	8.228142464	0.730119035	0.007959094	0.15430841	0.02345029	0.15430841	0.00154533	0.024150465
914	ENSG00000105726	ATP13A1	1.71E-05	0.000323986	0.5646284	0.131309855	10.16283373	0.116332302	0.007667351	0.018196066	0.012540726	0.018196066	0.001547043	0.024150465
915	ENSG00000161513	FDXR	1.70E-05	0.000323986	-0.659561044	0.153371211	8.808294843	0.158733505	0.007161681	0.028122411	0.018730031	0.028122411	0.00154617	0.024150465
916	ENSG00000258947	TUBB3	1.71E-05	0.000323986	0.439740303	0.10226626	10.683666	0.070561526	0.000635148	0.015052434	0.011311653	0.015052434	0.001547071	0.024150465
917	ENSG00000136114	THSD1	1.71E-05	0.000324534	0.483971617	0.112575183	9.354897971	0.084192532	0.003407156	0.013997811	0.015602601	0.015602601	0.001354602	0.023761104
918	ENSG00000178802	MPI	1.71E-05	0.000324534	-0.662900889	0.154194473	10.59124943	0.160362399	0.002591828	0.033072075	0.011501043	0.033072075	0.001548677	0.024150465
919	ENSG00000085871	MGST2	1.73E-05	0.000327795	-0.550722141	0.128178217	9.392676526	0.11070405	0.003338249	0.021306234	0.015420752	0.021306234	0.001553679	0.024189172
920	ENSG00000135318	NT5E	1.74E-05	0.000327795	0.509322864	0.11854649	11.1326416	0.094686858	0.001228044	0.019851861	0.010534399	0.019851861	0.001553944	0.024189172
921	ENSG00000149357	LAMTOR1	1.76E-05	0.000332859	-0.415059611	0.096688399	10.74477026	0.06290072	0.000819607	0.013203362	0.011190855	0.013203362	0.001561018	0.024229408
922	ENSG00000169756	LIMS1	1.77E-05	0.000333747	0.426317278	0.09933014	10.74628571	0.066363699	0.001613371	0.013186344	0.011187898	0.013186344	0.001562639	0.024229408
923	ENSG00000111653	ING4	1.81E-05	0.000338194	-0.91822942	0.214153814	9.687699635	0.307977808	0.003214223	0.065578561	0.014147092	0.065578561	0.001570875	0.024229408
924	ENSG00000120594	PLXDC2	1.80E-05	0.000338194	-1.599386677	0.37296873	6.926564594	0.934338131	0.031921777	0.176736733	0.041780074	0.176736733	0.001569798	0.024229408
925	ENSG00000130558	OLFM1	1.81E-05	0.000338194	-0.570483144	0.133063397	9.82884118	0.118882346	0.004375573	0.022183228	0.013618475	0.022183228	0.001571672	0.024229408
926	ENSG00000141404	GNAL	1.81E-05	0.000338194	-0.90568648	0.211233674	7.122959954	0.292062974	0.028661179	0.028817038	0.038268318	0.038268318	0.001256863	0.023761104
927	ENSG00000152910	CNTNAP4	1.80E-05	0.000338194	-0.858749013	0.200246965	9.903185171	0.269353576	0.028268856	0.031879415	0.013358225	0.031879415	0.001569425	0.024229408
928	ENSG00000177374	HIC1	1.81E-05	0.000338194	1.186977836	0.276849732	7.189459646	0.514649843	0.036452374	0.078516286	0.037144916	0.078516286	0.001571396	0.024229408
929	ENSG00000189057	FAM111B	1.80E-05	0.000338194	0.376453305	0.0877901	11.48945356	0.045310712	0.001471227	0.002023254	0.010089425	0.010089425	0.000535867	0.020744939
930	ENSG00000123213	NLN	1.83E-05	0.000341332	0.398615196	0.093025477	10.92721197	0.054695122	0.002124277	0.006659347	0.010856332	0.010856332	0.000949666	0.022219278
931	ENSG00000188153	COL4A5	1.84E-05	0.00034341	-0.880802947	0.205630639	8.416600941	0.283484901	0.014160527	0.049265413	0.021712517	0.049265413	0.001579307	0.024229408
932	ENSG00000177425	PAWR	1.85E-05	0.000344831	0.846283467	0.197625184	9.629901381	0.261725568	0.005147283	0.053436287	0.014377653	0.053436287	0.001581592	0.024229408
933	ENSG00000167601	AXL	1.86E-05	0.000346334	0.854092248	0.199504907	13.71564348	0.26660472	0.000121981	0.059581331	0.009257838	0.059581331	0.001583978	0.024229408
934	ENSG00000166295	ANAPC16	1.88E-05	0.000349278	-0.511135124	0.119453764	12.56669936	0.095500777	0.002073708	0.019330094	0.009327001	0.019330094	0.001588184	0.024229408
935	ENSG00000148219	ASTN2	1.90E-05	0.000352168	-0.541686061	0.126654981	9.019898951	0.095620712	0.006661289	0.002830681	0.017400938	0.017400938	0.000624808	0.020744939
936	ENSG00000181333	HEPHL1	1.91E-05	0.00035478	-2.88435705	0.674706642	2.915656512	2.920303182	0.410451705	0.120108926	0.272391873	0.272391873	0.0011241	0.023386664
937	ENSG00000185436	IFNLR1	1.92E-05	0.000355327	-0.918900841	0.214977814	7.247934697	0.308772179	0.022957431	0.04636576	0.036182453	0.04636576	0.001597223	0.024229408
938	ENSG00000103335	PIEZO1	1.92E-05	0.000355615	0.829192001	0.194009319	9.728981847	0.251435352	0.001930801	0.054528623	0.013987565	0.054528623	0.001598059	0.024229408
939	ENSG00000139800	ZIC5	1.92E-05	0.000356032	0.515381123	0.120599817	8.991478881	0.086981581	0.004246682	0.004873656	0.017569792	0.017569792	0.000650365	0.020744939
940	ENSG00000180425	C11orf71	1.93E-05	0.000356032	-0.795972695	0.18626895	7.797418244	0.19992339	0.023783438	-0.0114689	0.028260745	0.028260745	0.000496549	0.020744939
941	ENSG00000070540	WIPI1	1.94E-05	0.000357716	-0.671784185	0.157254502	8.995350966	0.165062972	0.005757847	0.03133562	0.01754662	0.03133562	0.001602114	0.024229408
942	ENSG00000061918	GUCY1B1	1.95E-05	0.000359407	-0.743270085	0.174040755	9.601220568	0.202083347	0.002469392	0.042965884	0.014495299	0.042965884	0.001604699	0.024229408
943	ENSG00000107736	CDH23	1.95E-05	0.0003601	-1.256220062	0.294196668	6.314425777	0.548579507	0.07487144	0.019069627	0.054956079	0.054956079	0.001041432	0.022671365
944	ENSG00000165684	SNAPC4	1.96E-05	0.000360411	0.46225996	0.108268452	10.60546602	0.07817175	0.001873315	0.015709772	0.011471321	0.015709772	0.0016069	0.024229408
945	ENSG00000164171	ITGA2	1.96E-05	0.000360727	-0.427447082	0.100124863	11.42088097	0.066843288	0.000822732	0.014214751	0.010165145	0.014214751	0.001607769	0.024229408
946	ENSG00000133606	MKRN1	1.98E-05	0.000362894	-0.505984147	0.118564995	10.56747475	0.093675177	0.004261593	0.016824894	0.011551268	0.016824894	0.001610938	0.024229408
947	ENSG00000167550	RHEBL1	1.99E-05	0.000365141	-0.684360482	0.160423775	8.736095952	0.171387726	0.004974441	0.03362924	0.019224526	0.03362924	0.001614197	0.024229934
948	ENSG00000183648	NDUFB1	2.00E-05	0.000365531	-0.481745576	0.112946754	11.18166251	0.084932003	0.001443384	0.01769207	0.010465268	0.01769207	0.001615632	0.024229934
949	ENSG00000183908	LRRC55	2.00E-05	0.000365531	-2.038360185	0.477888406	4.04666387	1.405646631	0.181929089	0.017037107	0.160636903	0.160636903	0.000841457	0.021797996
950	ENSG00000164291	ARSK	2.01E-05	0.000368103	-0.538470319	0.126300372	9.171000301	0.104938263	0.0073794	0.015062071	0.016548275	0.016548275	0.00146791	0.024117947
951	ENSG00000172992	DCAKD	2.02E-05	0.000368103	-0.397349762	0.093204372	10.99310568	0.048982823	0.002283469	-0.000262502	0.010747114	0.010747114	0.000447016	0.020744939
952	ENSG00000284792	PTEN	2.05E-05	0.000373431	-0.381995428	0.08967527	11.3353148	0.053426137	0.001425119	0.010637362	0.010265789	0.010637362	0.001626771	0.024322925
953	ENSG00000278817	AC007325.4	2.06E-05	0.000375059	-1.055408462	0.247832463	8.282554939	0.407871222	0.00941831	0.082713084	0.022926329	0.082713084	0.001629236	0.024329495
954	ENSG00000133226	SRRM1	2.07E-05	0.000376115	0.436340904	0.102482935	9.872516346	0.065907814	0.002289986	0.008697262	0.013464142	0.013464142	0.001016512	0.022653971
955	ENSG00000196155	PLEKHG4	2.08E-05	0.0003787	0.866329551	0.203558369	9.51839656	0.274881279	0.004049317	0.058104697	0.014847654	0.058104697	0.001634619	0.024329495
956	ENSG00000010704	HFE	2.10E-05	0.000381247	-0.898709452	0.211264249	8.513877398	0.295862703	0.010927625	0.056021249	0.020898493	0.056021249	0.001638661	0.024329495
957	ENSG00000129596	CDO1	2.10E-05	0.000381247	-0.674793643	0.158620315	7.516468936	0.165719974	0.005683729	0.030711316	0.032056877	0.032056877	0.001548504	0.024150465
958	ENSG00000139211	AMIGO2	2.11E-05	0.00038207	1.187135863	0.279113132	12.53738252	0.516272436	0.000407455	0.116448756	0.009338474	0.116448756	0.001640135	0.024329495
959	ENSG00000007174	DNAH9	2.11E-05	0.000383064	-1.796759594	0.422525651	4.381606168	1.033620827	0.130891428	-0.049494785	0.136900461	0.136900461	0.00056501	0.020744939
960	ENSG00000187957	DNER	2.12E-05	0.000383857	0.644114505	0.151494646	8.816455146	0.152005802	0.003036847	0.031389095	0.018675533	0.031389095	0.001643251	0.024329495
961	ENSG00000150093	ITGB1	2.13E-05	0.000385218	0.339344489	0.079832516	12.28925223	0.039395201	0.000104346	0.005956649	0.0094555	0.0094555	0.000930791	0.022119976
962	ENSG00000115204	MPV17	2.15E-05	0.000387585	-0.367321265	0.086456303	11.46633618	0.048965769	0.001097558	0.009512811	0.01011448	0.01011448	0.001515683	0.024150465
963	ENSG00000139044	B4GALNT3	2.15E-05	0.000387585	-1.029304001	0.242240948	7.509059145	0.38018554	0.055856823	0.022075079	0.032164192	0.032164192	0.001376521	0.023761104
964	ENSG00000172725	CORO1B	2.15E-05	0.000387585	-0.450702596	0.106079295	11.92037629	0.074443229	0.002285435	0.01459379	0.009697061	0.01459379	0.001649451	0.024329495
965	ENSG00000074660	SCARF1	2.16E-05	0.000388552	-0.810123959	0.190723817	7.172932666	0.240540938	0.016334156	0.038229205	0.037421159	0.038229205	0.001651741	0.024329495
966	ENSG00000227051	C14orf132	2.16E-05	0.000388552	-0.616110494	0.145048668	7.960753407	0.131370506	0.00526323	0.016602849	0.026295444	0.026295444	0.001022952	0.022653971
967	ENSG00000183087	GAS6	2.17E-05	0.000389168	0.379518616	0.089361051	10.92656087	0.052074279	0.001120656	0.0099593	0.01085744	0.01085744	0.0014687	0.024117947
968	ENSG00000205544	TMEM256	2.18E-05	0.000391089	-0.708185429	0.166801024	10.39599488	0.183845078	0.001618283	0.04011559	0.011935898	0.04011559	0.00165577	0.024329495
969	ENSG00000274180	NATD1	2.19E-05	0.000392175	-1.033742503	0.24352942	9.548772923	0.391754963	0.002970091	0.085989776	0.014716199	0.085989776	0.001657548	0.024329495
970	ENSG00000142949	PTPRF	2.20E-05	0.00039437	0.592355552	0.139596089	12.07968329	0.128650012	0.005105705	0.024124897	0.00958262	0.024124897	0.001660641	0.024329495
971	ENSG00000235109	ZSCAN31	2.22E-05	0.0003972	-0.50936257	0.120089681	9.705063841	0.095140906	0.004576767	0.01705553	0.01407948	0.01705553	0.001664479	0.024329495
972	ENSG00000156171	DRAM2	2.23E-05	0.000398289	-0.771284446	0.18187786	10.01849783	0.218159376	0.00291669	0.046702644	0.012977165	0.046702644	0.00166625	0.024329495
973	ENSG00000276504	TFPT	2.25E-05	0.000402334	-0.761687	0.179720599	8.997147287	0.212809518	0.018708593	0.029740648	0.017535888	0.029740648	0.001671499	0.024339499
974	ENSG00000109654	TRIM2	2.26E-05	0.000403468	-1.249200257	0.294809723	8.246375224	0.572445711	0.003494363	0.126874796	0.023272685	0.126874796	0.001673315	0.024339499
975	ENSG00000142002	DPP9	2.28E-05	0.000405645	0.500954804	0.118277749	9.262793016	0.087903136	0.004920023	0.010850504	0.016064416	0.016064416	0.001137878	0.023393159
976	ENSG00000167131	CCDC103	2.28E-05	0.000405645	-1.224708045	0.289144327	5.813558933	0.550113864	0.05636367	0.068812487	0.069042992	0.069042992	0.001672	0.024339499
977	ENSG00000180616	SSTR2	2.28E-05	0.000405645	-1.898926644	0.448343362	7.609447901	1.322990844	0.04295743	0.258560226	0.0307418	0.258560226	0.001677282	0.024339499
978	ENSG00000025434	NR1H3	2.28E-05	0.000405808	-0.832498981	0.196571714	7.292639268	0.254284893	0.021097515	0.036863143	0.035462013	0.036863143	0.001677998	0.024339499
979	ENSG00000104518	GSDMD	2.36E-05	0.000417499	-0.452599017	0.107041829	10.72799441	0.071511991	0.00596322	0.006609567	0.011223709	0.011223709	0.00111378	0.023345859
980	ENSG00000189195	BTBD8	2.36E-05	0.000417499	-0.976925484	0.231046671	9.411520277	0.350374097	0.018221071	0.061852775	0.01533176	0.061852775	0.0016925	0.024418719
981	ENSG00000105696	TMEM59L	2.37E-05	0.000420324	-1.549077108	0.36651562	6.783968384	0.881092405	0.026136881	0.175363668	0.044526884	0.175363668	0.001696267	0.024418719
982	ENSG00000115459	ELMOD3	2.39E-05	0.000422298	-0.550161274	0.130213503	9.594096049	0.110635878	0.010908471	0.013882341	0.014524864	0.014524864	0.001633011	0.024329495
983	ENSG00000124374	PAIP2B	2.39E-05	0.000422298	-0.58678918	0.13888557	9.988209947	0.126443504	0.002000539	0.026933263	0.013074711	0.026933263	0.001699509	0.024428978
984	ENSG00000165507	DEPP1	2.40E-05	0.000423739	-1.11560219	0.264111195	5.326233243	0.405538156	0.017889102	0.0223205	0.086742983	0.086742983	0.000662572	0.020744939
985	ENSG00000092758	COL9A3	2.40E-05	0.000423765	-2.002549006	0.474135453	6.310493476	1.472826069	0.030742511	0.30646413	0.055053594	0.30646413	0.001702519	0.024428978
986	ENSG00000179604	CDC42EP4	2.41E-05	0.000423765	-0.487285397	0.115374353	9.758532892	0.087207607	0.000840762	0.0191261	0.013875915	0.0191261	0.001702657	0.024428978
987	ENSG00000071082	RPL31	2.41E-05	0.000423905	-0.442287591	0.104727751	15.55067446	0.071846976	0.000148193	0.01630366	0.010762436	0.01630366	0.001703308	0.024428978
988	ENSG00000149809	TM7SF2	2.45E-05	0.000430319	-1.814732067	0.43009526	8.095313604	1.209954061	0.01353235	0.263940549	0.024806836	0.263940549	0.001711584	0.024492287
989	ENSG00000221869	CEBPD	2.45E-05	0.000430319	-1.089501826	0.25820389	9.838837009	0.436107368	0.002286803	0.09771707	0.013582784	0.09771707	0.00171122	0.024492287
990	ENSG00000104783	KCNN4	2.46E-05	0.000431646	1.001565811	0.237425083	7.432438426	0.368585026	0.015594545	0.06896146	0.033295624	0.06896146	0.001713579	0.02450065
991	ENSG00000145882	PCYOX1L	2.48E-05	0.000434478	-0.506008737	0.119999783	10.61980004	0.09409339	0.002901467	0.018698455	0.011441581	0.018698455	0.001717268	0.024506317
992	ENSG00000111788	AC009533.1	2.48E-05	0.000434525	0.721743365	0.171171387	7.718521139	0.191433618	0.012907621	0.031041845	0.02927331	0.031041845	0.001717814	0.024506317
993	ENSG00000104897	SF3A2	2.49E-05	0.000435002	0.418398904	0.099240252	10.02793984	0.058094491	0.001825828	0.00514567	0.012947113	0.012947113	0.00076347	0.021257757
994	ENSG00000161920	MED11	2.51E-05	0.000438163	-0.489491455	0.116160263	9.119296894	0.08737697	0.003407988	0.015962518	0.016831822	0.016831822	0.00161087	0.024229408
995	ENSG00000284976	BX255925.3	2.51E-05	0.000438163	0.402008851	0.095399158	10.32966077	0.053733866	0.001554403	0.005008761	0.012097096	0.012097096	0.000775863	0.021384958
996	ENSG00000185291	IL3RA	2.52E-05	0.000439336	-2.579151723	0.612174025	3.194162475	2.357323213	0.3225451	0.129600062	0.239590456	0.239590456	0.001271192	0.023761104
997	ENSG00000102796	DHRS12	2.52E-05	0.000439401	-1.29779097	0.308055933	5.403338731	0.61915657	0.051688515	0.090659172	0.083625639	0.090659172	0.001725761	0.024533325
998	ENSG00000033050	ABCF2	2.52E-05	0.000439497	0.368996852	0.087594313	11.35251029	0.04371356	0.001264153	0.002318293	0.010244993	0.010244993	0.000604516	0.020744939
999	ENSG00000055044	NOP58	2.55E-05	0.000443187	0.587636805	0.139566217	10.59204578	0.126969579	0.002288832	0.026929261	0.011499372	0.026929261	0.001730984	0.024533325
1000	ENSG00000133110	POSTN	2.59E-05	0.000449688	-1.281561612	0.304630747	8.5022702	0.60407992	0.015976428	0.12322341	0.02099282	0.12322341	0.001738701	0.024533325
1001	ENSG00000104290	FZD3	2.61E-05	0.00045281	-0.741506654	0.176333227	10.53966208	0.202261724	0.023975499	0.022664612	0.011610891	0.022664612	0.001742644	0.024533325
1002	ENSG00000135378	PRRG4	2.64E-05	0.000456888	-1.275973386	0.30359428	7.181265486	0.599035809	0.016855401	0.12139883	0.037281637	0.12139883	0.001747623	0.024533325
1003	ENSG00000169019	COMMD8	2.66E-05	0.000461467	-0.457953702	0.10902603	9.848012712	0.077180488	0.00151966	0.016310353	0.013550216	0.016310353	0.001753126	0.024533325
1004	ENSG00000143171	RXRG	2.67E-05	0.000461855	-1.710902218	0.407358517	5.495590787	1.077285074	0.059151878	0.189759565	0.080063146	0.189759565	0.00175405	0.024533325
1005	ENSG00000117335	CD46	2.67E-05	0.000462144	-0.388371368	0.092477647	13.22322042	0.055512234	0.002368071	0.010460101	0.009197262	0.010460101	0.001754865	0.024533325
1006	ENSG00000115738	ID2	2.69E-05	0.000465223	-0.987792898	0.235306721	10.42003385	0.359163546	0.004217149	0.078836731	0.011879339	0.078836731	0.001758714	0.024533325
1007	ENSG00000157216	SSBP3	2.72E-05	0.000469483	-0.416618628	0.099298822	10.45498833	0.053349985	0.002991645	-0.001393319	0.011798739	0.011798739	0.000461504	0.020744939
1008	ENSG00000104892	KLC3	2.73E-05	0.000469993	-0.858882942	0.204750087	6.879827432	0.27161109	0.017910442	0.044973455	0.042661199	0.044973455	0.001765656	0.024533325
1009	ENSG00000109738	GLRB	2.73E-05	0.000469993	-0.632879992	0.150869518	7.905658057	0.146430771	0.007203637	0.02563342	0.02693878	0.02693878	0.001662693	0.024329495
1010	ENSG00000143363	PRUNE1	2.73E-05	0.000469993	-0.401996627	0.095834775	10.68262571	0.053895788	0.002462719	0.004306533	0.011313738	0.011313738	0.000809601	0.021797996
1011	ENSG00000145431	PDGFC	2.74E-05	0.000471204	-0.616905736	0.147096778	10.80564034	0.140136761	0.001373314	0.031082879	0.011073891	0.031082879	0.001767694	0.024533325
1012	ENSG00000136425	CIB2	2.75E-05	0.000471844	-0.639406223	0.15248119	8.372940731	0.150552711	0.010947611	0.023928159	0.022095969	0.023928159	0.001768886	0.024533325
1013	ENSG00000118655	DCLRE1B	2.76E-05	0.000472669	0.368503857	0.087895952	11.30332384	0.045274502	0.001283278	0.004386691	0.01030527	0.01030527	0.000809525	0.021797996
1014	ENSG00000125885	MCM8	2.76E-05	0.000472669	0.345044333	0.082299802	12.01910909	0.038994636	0.000535589	0.00356186	0.009624298	0.009624298	0.000712377	0.020908324
1015	ENSG00000178401	DNAJC22	2.77E-05	0.0004733	-0.79222773	0.188986767	8.103702619	0.231146631	0.019774284	0.033799713	0.024717871	0.033799713	0.001771963	0.024533325
1016	ENSG00000066084	DIP2B	2.78E-05	0.000474395	0.353540139	0.084356906	11.27460203	0.042138541	0.000332519	0.005469171	0.010341612	0.010341612	0.000879856	0.021935234
1017	ENSG00000262795	IFNGR2	2.78E-05	0.000474395	-0.354904392	0.084679353	12.75584702	0.042745965	0.001491123	0.004707411	0.009264767	0.009264767	0.000924111	0.022069866
1018	ENSG00000184160	ADRA2C	2.78E-05	0.000474479	-1.094924818	0.261272378	6.447824639	0.441574014	0.028066009	0.074328874	0.051755105	0.074328874	0.001774738	0.024533325
1019	ENSG00000029363	BCLAF1	2.80E-05	0.000476322	0.342709818	0.081803723	14.08463732	0.038066491	0.000644866	0.00289449	0.009392907	0.009392907	0.000663981	0.020744939
1020	ENSG00000124406	ATP8A1	2.79E-05	0.000476322	-1.025147127	0.244688001	6.59412938	0.387124651	0.027298888	0.062509439	0.048470057	0.062509439	0.001777287	0.024533325
1021	ENSG00000145365	TIFA	2.80E-05	0.000477104	-0.590423174	0.140952102	10.40708635	0.128420851	0.005103837	0.024697405	0.011909684	0.024697405	0.001779065	0.024533325
1022	ENSG00000101361	NOP56	2.82E-05	0.000479867	0.74966984	0.179034685	12.47792234	0.207065563	0.000749701	0.047330427	0.009363261	0.047330427	0.00178253	0.024533325
1023	ENSG00000125841	NRSN2	2.83E-05	0.000480329	-0.498377383	0.119034039	9.449070097	0.091516928	0.002057368	0.019196285	0.015157738	0.019196285	0.001783527	0.024533325
1024	ENSG00000117597	UTP25	2.86E-05	0.000484593	0.357879966	0.085523668	11.32063089	0.038751084	0.000687664	-0.000278086	0.010283782	0.010283782	0.00042434	0.020744939
1025	ENSG00000243749	TMEM35B	2.86E-05	0.000484593	-0.683689725	0.163390272	9.567629348	0.172265149	0.002973147	0.037071425	0.014635906	0.037071425	0.001789086	0.024533325
1026	ENSG00000137161	CNPY3	2.88E-05	0.000487006	-0.478237158	0.114328264	11.23828302	0.084298376	0.000560287	0.019046141	0.010388813	0.019046141	0.001792222	0.024533325
1027	ENSG00000140534	TICRR	2.88E-05	0.000487006	0.379520207	0.090732981	10.9437097	0.049594034	0.001520278	0.00645892	0.010828433	0.010828433	0.001038695	0.0226686
1028	ENSG00000143333	RGS16	2.89E-05	0.000487739	-2.111980223	0.50498515	8.807621287	1.64415014	0.006644638	0.375870364	0.018734542	0.375870364	0.001793943	0.024533325
1029	ENSG00000164619	BMPER	2.91E-05	0.0004903	-1.51691646	0.362863166	6.766759454	0.848314277	0.111501465	0.08600305	0.044870415	0.08600305	0.001798172	0.024533325
1030	ENSG00000172889	EGFL7	2.91E-05	0.0004903	-0.922531248	0.220676137	10.75158458	0.31375672	0.001335146	0.07171179	0.011177572	0.07171179	0.001798019	0.024533325
1031	ENSG00000174684	B4GAT1	2.90E-05	0.0004903	-0.600317739	0.143587472	10.7131415	0.132855251	0.001277019	0.029649024	0.011252988	0.029649024	0.001797163	0.024533325
1032	ENSG00000164362	TERT	2.92E-05	0.000491077	0.844789442	0.202111023	9.115784947	0.263119399	0.025995942	0.035277356	0.016851383	0.035277356	0.001799498	0.024533325
1033	ENSG00000196139	AKR1C3	2.92E-05	0.000491783	-1.35270666	0.323669647	7.098631165	0.674659041	0.015982694	0.141160367	0.038687332	0.141160367	0.001800749	0.024533325
1034	ENSG00000100100	PIK3IP1	3.01E-05	0.000505789	-2.280017273	0.546416904	7.772851239	1.917829348	0.019800462	0.428056687	0.028571589	0.428056687	0.001815955	0.024569131
1035	ENSG00000082556	OPRK1	3.02E-05	0.000507704	-1.668451763	0.399955936	4.980337137	0.956389642	0.137466761	0.01412106	0.102480365	0.102480365	0.001031886	0.022653971
1036	ENSG00000165782	PIP4P1	3.04E-05	0.00051026	-0.437446954	0.104897703	9.718617918	0.069795156	0.002478071	0.013005935	0.014027221	0.014027221	0.00165386	0.024329495
1037	ENSG00000129351	ILF3	3.07E-05	0.000514355	0.349713552	0.083904414	12.48308265	0.038291389	0.001198897	0.000803	0.009361029	0.009361029	0.00054045	0.020744939
1038	ENSG00000181004	BBS12	3.07E-05	0.000514355	-0.749797596	0.179895459	7.72977748	0.207493782	0.009971325	0.038572239	0.029126305	0.038572239	0.001826867	0.024640013
1039	ENSG00000132357	CARD6	3.08E-05	0.000515155	-0.652199233	0.156500687	7.721987798	0.150724291	0.007510751	0.021383172	0.029227946	0.029227946	0.001313224	0.023761104
1040	ENSG00000149761	NUDT22	3.10E-05	0.000518482	-0.427597998	0.102647298	9.992651119	0.066786259	0.002744404	0.012173401	0.013060297	0.013060297	0.001678492	0.024339499
1041	ENSG00000092036	HAUS4	3.11E-05	0.000519583	-0.593359514	0.142463326	10.60596582	0.129977613	0.002436089	0.02800761	0.01147028	0.02800761	0.001833778	0.024690511
1042	ENSG00000112164	GLP1R	3.12E-05	0.000519711	-2.004215762	0.48123625	4.664054948	1.482970239	0.1211014	0.226281092	0.119489975	0.226281092	0.001834421	0.024690511
1043	ENSG00000228913	UBD	3.14E-05	0.000523791	-6.579571979	1.580594663	3.77893371	15.98516561	1.001964848	2.745454385	0.182331215	2.745454385	0.001839111	0.024728361
1044	ENSG00000273274	ZBTB8B	3.16E-05	0.000526272	-0.903138063	0.21702631	6.71607306	0.296276486	0.024752671	0.039721051	0.045897957	0.045897957	0.001607627	0.024229408
1045	ENSG00000159217	IGF2BP1	3.18E-05	0.000527858	0.491605584	0.118159752	9.696136083	0.076510934	0.006828442	-0.001818293	0.014114149	0.014114149	0.000586935	0.020744939
1046	ENSG00000118181	RPS25	3.20E-05	0.00053088	-0.333967869	0.080300159	14.42075303	0.040629541	8.71E-05	0.008874365	0.009585063	0.009585063	0.001647973	0.024329495
1047	ENSG00000162627	SNX7	3.22E-05	0.000534137	-0.437514018	0.105237965	12.05296731	0.07071559	0.000947341	0.015665203	0.009600726	0.015665203	0.001851679	0.024839667
1048	ENSG00000114698	PLSCR4	3.29E-05	0.000545147	-1.109814868	0.267264618	6.953440535	0.455223164	0.030783234	0.07636233	0.041281565	0.07636233	0.001863255	0.024859045
1049	ENSG00000124702	KLHDC3	3.30E-05	0.000546888	-0.335065523	0.080708599	12.43013018	0.040827368	0.000386153	0.008547218	0.009384664	0.009384664	0.001632659	0.024329495
1050	ENSG00000068001	HYAL2	3.33E-05	0.000551086	-0.416681964	0.100415492	10.24888454	0.064187083	0.001694536	0.013430371	0.012304546	0.013430371	0.001870207	0.024859045
1051	ENSG00000156411	ATP5MPL	3.34E-05	0.000551688	-0.340835054	0.082146534	12.71714345	0.041823285	0.000846231	0.007869674	0.009275848	0.009275848	0.001508593	0.024150465
1052	ENSG00000077274	CAPN6	3.36E-05	0.000554156	-1.831112193	0.441458352	5.385147563	1.23975413	0.061601564	0.23072665	0.084349355	0.23072665	0.001874291	0.024859045
1053	ENSG00000162522	KIAA1522	3.37E-05	0.000555692	0.451278242	0.108819899	11.13340084	0.07530574	0.004174441	0.013588215	0.010533307	0.013588215	0.001876331	0.024859045
1054	ENSG00000002933	TMEM176A	3.43E-05	0.000564771	-2.274222406	0.548919604	7.462204224	1.913201544	0.016049528	0.43591957	0.032851371	0.43591957	0.001885783	0.024859045
1055	ENSG00000174669	SLC29A2	3.43E-05	0.000565199	-0.829654504	0.200269155	8.187447813	0.25462726	0.007818265	0.052343337	0.02385414	0.052343337	0.001886726	0.024859045
1056	ENSG00000183978	COA3	3.44E-05	0.000565512	-0.43426393	0.104835078	11.11169496	0.069764021	0.001575038	0.014910553	0.010564799	0.014910553	0.001887557	0.024859045
1057	ENSG00000099864	PALM	3.44E-05	0.000565623	-2.48284401	0.599417989	7.454741077	2.280516625	0.084433565	0.454519323	0.032962196	0.454519323	0.001888189	0.024859045
1058	ENSG00000107960	STN1	3.45E-05	0.000565981	-0.432039056	0.104313694	9.764887084	0.062601468	0.002469842	0.005785338	0.013852178	0.013852178	0.000890436	0.021935234
1059	ENSG00000096433	ITPR3	3.45E-05	0.000566297	0.330614826	0.07983215	12.78985353	0.033603846	0.00030403	0.000710966	0.009255728	0.009255728	0.000499435	0.020744939
1060	ENSG00000109606	DHX15	3.46E-05	0.000566297	0.348211639	0.084085366	11.28534507	0.037306063	0.000277605	0.000885718	0.010327918	0.010327918	0.00050208	0.020744939
1061	ENSG00000156113	KCNMA1	3.47E-05	0.000567543	0.608041542	0.146854049	11.5834125	0.136793689	0.003786214	0.028562954	0.009992295	0.028562954	0.001892162	0.024859045
1062	ENSG00000181634	TNFSF15	3.47E-05	0.000567961	-1.64675941	0.39776194	4.71299426	1.003402439	0.067490332	0.169831509	0.116694146	0.169831509	0.001893095	0.024859045
1063	ENSG00000168517	HEXIM2	3.49E-05	0.000570003	-0.828301782	0.200120092	7.028454534	0.247324094	0.020151249	0.031722428	0.039920828	0.039920828	0.001534409	0.024150465
1064	ENSG00000106003	LFNG	3.51E-05	0.000572851	0.62841947	0.151877847	10.12723351	0.146153565	0.003099614	0.031500706	0.012643486	0.031500706	0.001898915	0.024859045
1065	ENSG00000159885	ZNF222	3.53E-05	0.000575213	-0.642629446	0.155355698	8.225120462	0.148647492	0.012723163	0.018221475	0.023479926	0.023479926	0.00151886	0.024150465
1066	ENSG00000115255	REEP6	3.57E-05	0.000581678	-1.12255957	0.271561472	7.710422377	0.466536756	0.006160541	0.104457908	0.029379602	0.104457908	0.001908523	0.024966009
1067	ENSG00000224081	SLC44A3-AS1	3.58E-05	0.000583226	-1.393340939	0.337134313	6.639888406	0.718811145	0.047840945	0.122648372	0.047487891	0.122648372	0.001910543	0.024973634
1068	ENSG00000184702	05-Sep	3.63E-05	0.000591093	-0.970569986	0.235027557	9.069498541	0.348887372	0.0073254	0.075531529	0.017112878	0.075531529	0.001918626	0.024994786
1069	ENSG00000134369	NAV1	3.65E-05	0.000593152	0.445243529	0.107844075	12.87014916	0.073428954	0.002412137	0.01503338	0.00923697	0.01503338	0.001921123	0.024994786
1070	ENSG00000185697	MYBL1	3.65E-05	0.000593359	0.596585359	0.144511473	9.954958433	0.131834506	0.001986824	0.029338525	0.013183857	0.029338525	0.00192185	0.024994786
1071	ENSG00000126351	THRA	3.66E-05	0.000593361	-0.785820809	0.190360096	9.234582189	0.228738663	0.00252583	0.05182962	0.016210554	0.05182962	0.001922381	0.024994786
1072	ENSG00000148680	HTR7	3.67E-05	0.000594357	-0.611258645	0.148095067	9.841656751	0.138409718	0.002401014	0.030497209	0.013572756	0.030497209	0.001923862	0.024994786
1073	ENSG00000183775	KCTD16	3.68E-05	0.000595752	-1.752598644	0.42469522	6.963546896	1.137919838	0.054550778	0.215998268	0.041095626	0.215998268	0.001925722	0.024994786
1074	ENSG00000173208	ABCD2	3.72E-05	0.000601343	-1.471919387	0.356884577	5.091205687	0.802803927	0.07575141	0.115298493	0.097102586	0.115298493	0.001931569	0.025014076
1075	ENSG00000165898	ISCA2	3.75E-05	0.000606261	-0.435742492	0.105704567	10.32977363	0.070369602	0.001943808	0.014816376	0.012096815	0.014816376	0.001936754	0.025035567
1076	ENSG00000103168	TAF1C	3.76E-05	0.00060665	0.493387709	0.119704283	9.813352517	0.089893153	0.007819454	0.013260201	0.01367422	0.01367422	0.001880953	0.024859045
1077	ENSG00000168297	PXK	3.76E-05	0.00060665	-0.448319345	0.108770716	11.10447354	0.074494353	0.001307288	0.016439315	0.010575401	0.016439315	0.001938185	0.025035567
1078	ENSG00000168679	SLC16A4	3.77E-05	0.000608252	-1.223629203	0.296934661	9.098607926	0.554984759	0.006926499	0.12532879	0.016947619	0.12532879	0.00194023	0.025041359
1079	ENSG00000163530	DPPA2	3.79E-05	0.000610681	-1.060204914	0.257347619	5.992437716	0.402056072	0.035741724	0.045315444	0.063599971	0.063599971	0.001463205	0.024117947
1080	ENSG00000112320	SOBP	3.82E-05	0.000613825	-0.9539805	0.231652731	7.89358268	0.337419224	0.008160625	0.072333857	0.027082435	0.072333857	0.001947019	0.025056446
1081	ENSG00000127423	AUNIP	3.82E-05	0.000613825	0.447662394	0.108705309	9.431013565	0.065383653	0.002484392	0.004094567	0.015240874	0.015240874	0.000755685	0.021173801
1082	ENSG00000205795	CYS1	3.83E-05	0.000614896	-1.411114878	0.342710485	8.234318305	0.738314132	0.00523855	0.170937166	0.023389901	0.170937166	0.00194861	0.025056446
1083	ENSG00000174456	C12orf76	3.86E-05	0.0006187	-0.540108721	0.131225637	9.073931025	0.103513123	0.008742717	0.011254651	0.017087535	0.017087535	0.001380117	0.023761104
1084	ENSG00000172201	ID4	3.87E-05	0.000620653	-0.900782769	0.218905525	9.102197263	0.300926433	0.00369184	0.068187603	0.016927431	0.068187603	0.001955065	0.025093006
1085	ENSG00000125354	06-Sep	3.88E-05	0.000620854	-1.002063057	0.243535369	10.61428011	0.372410482	0.001936093	0.087028121	0.011453007	0.087028121	0.001955787	0.025093006
1086	ENSG00000137124	ALDH1B1	3.89E-05	0.000621492	0.336132023	0.081700426	11.92920379	0.035939127	0.00032213	0.002232503	0.00969031	0.00969031	0.000642921	0.020744939
1087	ENSG00000130203	APOE	3.89E-05	0.000622127	-1.387659718	0.337322037	7.597481653	0.714223236	0.009714072	0.160965163	0.030907778	0.160965163	0.001958044	0.02510342
1088	ENSG00000148840	PPRC1	3.91E-05	0.000624201	0.577862597	0.140504361	9.760052399	0.123867325	0.002652412	0.026959802	0.01387023	0.026959802	0.001960512	0.025116524
1089	ENSG00000102575	ACP5	3.91E-05	0.000624202	-1.521648387	0.370000194	4.641746015	0.850589773	0.084564898	0.110392139	0.120785318	0.120785318	0.001813115	0.024549829
1090	ENSG00000164188	RANBP3L	3.95E-05	0.000629209	-2.67020968	0.649606257	3.098360886	2.463773957	0.382548003	0.023412042	0.250434432	0.250434432	0.001137833	0.023393159
1091	ENSG00000106049	HIBADH	3.96E-05	0.000629567	-0.391465848	0.095257326	11.23881391	0.056862403	0.00052999	0.013080947	0.010388112	0.013080947	0.001968623	0.025151327
1092	ENSG00000146281	PM20D2	3.96E-05	0.000629567	0.373746525	0.090945046	10.74681754	0.051073306	0.001219642	0.010239566	0.01118686	0.01118686	0.001749236	0.024533325
1093	ENSG00000148450	MSRB2	3.97E-05	0.000629567	-0.740549371	0.180204196	7.75544483	0.203492274	0.009092845	0.039617484	0.028794264	0.039617484	0.001968776	0.025151327
1094	ENSG00000198914	POU3F3	3.96E-05	0.000629567	-0.407995708	0.099274167	10.06500829	0.057922668	0.00195222	0.008028428	0.01283082	0.01283082	0.001198145	0.023598846
1095	ENSG00000205133	TRIQK	3.97E-05	0.000629567	-0.57235583	0.139282482	8.673432078	0.113386996	0.009426986	0.00946006	0.019672429	0.019672429	0.001152913	0.023430891
1096	ENSG00000175575	PAAF1	4.02E-05	0.000637048	-0.440312493	0.107226518	9.924855652	0.065518763	0.003961717	0.005233577	0.013284572	0.013284572	0.000974323	0.022359228
1097	ENSG00000111432	FZD10	4.02E-05	0.000637305	-1.5444726	0.376143496	5.390906409	0.885399399	0.062056956	0.150168939	0.084119472	0.150168939	0.001977477	0.025240803
1098	ENSG00000179841	AKAP5	4.05E-05	0.000640336	-0.612183454	0.149139691	9.76817595	0.139121751	0.002707906	0.030656065	0.01383993	0.030656065	0.001980807	0.025260397
1099	ENSG00000103091	WDR59	4.11E-05	0.000648928	-0.659763151	0.160860081	8.14817227	0.157080824	0.014560229	0.018558021	0.02425372	0.02425372	0.001586921	0.024229408
1100	ENSG00000127564	PKMYT1	4.12E-05	0.000650752	0.853229838	0.208073745	9.697485343	0.270353967	0.007518482	0.057423543	0.014108896	0.057423543	0.001991425	0.025318019
1101	ENSG00000111249	CUX2	4.21E-05	0.000663725	-2.446322523	0.597271198	1.92106289	1.902668957	0.108422748	0.025728241	0.426676579	0.426676579	0.000656493	0.020744939
1102	ENSG00000127084	FGD3	4.22E-05	0.000665615	-1.122435623	0.274101514	5.732657709	0.420622554	0.041022949	0.012307095	0.071674511	0.071674511	0.00090655	0.022069866
1103	ENSG00000164638	SLC29A4	4.26E-05	0.000670416	-0.947941937	0.231595815	7.010271628	0.333942121	0.01989147	0.060563462	0.040246586	0.060563462	0.00201083	0.025407055
1104	ENSG00000112234	FBXL4	4.27E-05	0.000671163	-0.454881905	0.111146892	11.00054494	0.076899622	0.001742692	0.016787755	0.010735149	0.016787755	0.002012045	0.025407055
1105	ENSG00000146233	CYP39A1	4.27E-05	0.000671845	-0.942701559	0.230366941	6.037838775	0.299113797	0.017307808	0.023327102	0.062295583	0.062295583	0.000961261	0.02222942
1106	ENSG00000132563	REEP2	4.29E-05	0.000674034	-1.048208797	0.256209961	6.633542184	0.408394758	0.016741743	0.081723573	0.047622866	0.081723573	0.002015705	0.025407055
1107	ENSG00000123933	MXD4	4.30E-05	0.000674484	-0.851707343	0.208198355	7.680493487	0.269637486	0.006662228	0.058357605	0.029776217	0.058357605	0.002016653	0.025407055
1108	ENSG00000106066	CPVL	4.35E-05	0.000679158	-0.602355418	0.147340059	9.146406146	0.134900526	0.002517901	0.030045738	0.016682127	0.030045738	0.002023552	0.025407055
1109	ENSG00000131016	AKAP12	4.34E-05	0.000679158	0.952437088	0.232961021	14.93061337	0.337265927	7.14E-05	0.081334897	0.010009502	0.081334897	0.002023035	0.025407055
1110	ENSG00000133958	UNC79	4.34E-05	0.000679158	-1.900823678	0.464939447	5.778784116	1.343341623	0.057568954	0.26668408	0.070160575	0.26668408	0.002023221	0.025407055
1111	ENSG00000163683	SMIM14	4.35E-05	0.000679158	-1.118609498	0.273619162	9.355958996	0.465227098	0.00488755	0.107413619	0.01559743	0.107413619	0.002023552	0.025407055
1112	ENSG00000187689	AMTN	4.35E-05	0.000679158	0.540892505	0.132303662	9.873116212	0.108774521	0.002137183	0.024119206	0.013462051	0.024119206	0.002023377	0.025407055
1113	ENSG00000095739	BAMBI	4.35E-05	0.000679175	-1.368837176	0.334854287	11.03399058	0.696667437	0.001253007	0.166938084	0.010682248	0.166938084	0.002024439	0.025407055
1114	ENSG00000117586	TNFSF4	4.36E-05	0.000679175	-0.923257524	0.225868214	6.842135359	0.316575534	0.033139423	0.042928323	0.043385252	0.043385252	0.002006505	0.025407055
1115	ENSG00000184277	TM2D3	4.36E-05	0.000679175	-0.39465413	0.096549875	10.36393085	0.054320116	0.001969971	0.007523218	0.012012847	0.012012847	0.001242052	0.023761104
1116	ENSG00000117362	APH1A	4.38E-05	0.000681202	-0.394112817	0.096438672	11.25367603	0.057757975	0.000523026	0.013427601	0.010368635	0.013427601	0.002027554	0.025409899
1117	ENSG00000144366	GULP1	4.39E-05	0.000683278	-0.620325887	0.151826556	8.657552033	0.134234284	0.014788133	0.008703144	0.019788821	0.019788821	0.001246018	0.023761104
1118	ENSG00000198910	L1CAM	4.41E-05	0.000685109	0.741026227	0.181405121	6.918406139	0.177476574	0.007429153	0.008496613	0.041932573	0.041932573	0.000739422	0.02100199
1119	ENSG00000174748	RPL15	4.42E-05	0.000686665	-0.381981468	0.093526863	15.93694719	0.054269681	7.15E-05	0.01304944	0.011379072	0.01304944	0.002034051	0.025409899
1120	ENSG00000081760	AACS	4.44E-05	0.000688395	-0.389971985	0.095503727	10.31950455	0.048627433	0.001558964	0.00219602	0.012122478	0.012122478	0.000691836	0.020795782
1121	ENSG00000139998	RAB15	4.44E-05	0.000688395	-0.373061916	0.091365296	11.22231029	0.048681633	0.002111404	0.006549939	0.010410022	0.010410022	0.001273686	0.023761104
1122	ENSG00000112759	SLC29A1	4.45E-05	0.000688739	0.411538283	0.100796382	10.09259259	0.05359078	0.002493342	0.000983724	0.012746524	0.012746524	0.000648216	0.020744939
1123	ENSG00000006062	MAP3K14	4.47E-05	0.000690658	0.844696044	0.20694168	10.88561277	0.265443253	0.001831657	0.062405631	0.010928367	0.062405631	0.002040321	0.025409899
1124	ENSG00000149743	TRPT1	4.46E-05	0.000690658	-0.598840912	0.146702566	9.373214319	0.133409103	0.003891664	0.0283908	0.015513856	0.0283908	0.002039794	0.025409899
1125	ENSG00000260916	CCPG1	4.49E-05	0.000693683	-0.474923138	0.116386037	9.276733053	0.083920448	0.002330498	0.017988066	0.015993017	0.017988066	0.002043545	0.025409899
1126	ENSG00000145916	RMND5B	4.51E-05	0.000695923	-0.439814969	0.107807583	10.84919619	0.071978132	0.002216031	0.015217682	0.010993463	0.015217682	0.002046071	0.025409899
1127	ENSG00000137726	FXYD6	4.53E-05	0.000699022	-0.938027018	0.229999363	9.164312181	0.327448054	0.003570709	0.075778851	0.016584493	0.075778851	0.002049352	0.025409899
1128	ENSG00000224383	PRR29	4.55E-05	0.000700827	-1.547363509	0.379480499	4.769388579	0.862914989	0.102459141	0.078309409	0.113549032	0.113549032	0.001597557	0.024229408
1129	ENSG00000122884	P4HA1	4.56E-05	0.000702018	-0.375555187	0.092115963	12.20061069	0.05249493	0.000482163	0.012245863	0.009506063	0.012245863	0.002053083	0.025409899
1130	ENSG00000105048	TNNT1	4.58E-05	0.000702322	-0.762340773	0.187019458	9.994571488	0.216320569	0.002655991	0.049808426	0.013054077	0.049808426	0.00205499	0.025409899
1131	ENSG00000105605	CACNG7	4.57E-05	0.000702322	-1.463494987	0.358999299	4.839846838	0.685537489	0.083588706	-0.029848437	0.109732039	0.109732039	0.000702291	0.020891804
1132	ENSG00000157399	ARSE	4.57E-05	0.000702322	-1.676490137	0.411271346	5.309557189	0.975201322	0.166281569	-0.001262109	0.087434611	0.087434611	0.001208746	0.023700156
1133	ENSG00000106366	SERPINE1	4.59E-05	0.000702476	1.645210845	0.403653167	15.63856013	1.007538672	5.41E-05	0.244349679	0.010892171	0.244349679	0.002056217	0.025409899
1134	ENSG00000117407	ARTN	4.59E-05	0.000702476	1.281750704	0.314478075	6.665470091	0.611541212	0.020694982	0.127649707	0.046947797	0.127649707	0.002056217	0.025409899
1135	ENSG00000143549	TPM3	4.60E-05	0.000702989	0.328867512	0.08070332	14.07765274	0.039029919	0.000379916	0.007849793	0.009389623	0.009389623	0.001616538	0.024229934
1136	ENSG00000168389	MFSD2A	4.60E-05	0.000702989	0.659349738	0.161792508	8.699569677	0.161834802	0.009716544	0.02954868	0.019483423	0.02954868	0.002057609	0.025409899
1137	ENSG00000168675	LDLRAD4	4.60E-05	0.000702989	-1.743415952	0.427818531	5.628173036	1.131484189	0.082048293	0.192494749	0.075242236	0.192494749	0.002058009	0.025409899
1138	ENSG00000112365	ZBTB24	4.63E-05	0.000705937	0.36492207	0.089583025	10.89111201	0.040432536	0.001118974	-0.000516347	0.010918704	0.010918704	0.000512586	0.020744939
1139	ENSG00000139990	DCAF5	4.63E-05	0.000705937	-0.428025052	0.105077281	11.16387827	0.068211116	0.004328594	0.012233259	0.010490027	0.012233259	0.002062536	0.025447705
1140	ENSG00000162604	TM2D1	4.63E-05	0.000705937	-0.442363133	0.108595889	9.539767693	0.072640303	0.002934705	0.014483746	0.014754896	0.014754896	0.002014177	0.025407055
1141	ENSG00000139734	DIAPH3	4.65E-05	0.000707657	0.36202113	0.08889058	11.00695235	0.043824064	0.001127401	0.004505442	0.010724902	0.010724902	0.000938589	0.022175554
1142	ENSG00000005448	WDR54	4.67E-05	0.000709747	-0.374138396	0.091890544	10.67078837	0.051672577	0.001328279	0.010770115	0.011337529	0.011337529	0.001929606	0.025014076
1143	ENSG00000165929	TC2N	4.67E-05	0.000709747	-0.774122303	0.190124791	8.66055402	0.223156526	0.014567896	0.039653258	0.019766727	0.039653258	0.002067284	0.025452065
1144	ENSG00000120727	PAIP2	4.69E-05	0.000712486	-0.496751604	0.122038049	11.06431955	0.091900589	0.000599854	0.021740074	0.010635513	0.021740074	0.002070467	0.025455171
1145	ENSG00000152315	KCNK13	4.77E-05	0.000722756	-1.416174232	0.348234767	4.969139091	0.713010017	0.078859866	0.060321609	0.103041313	0.103041313	0.001454332	0.024117947
1146	ENSG00000185652	NTF3	4.77E-05	0.000722756	0.920473601	0.226335694	7.124082845	0.315654911	0.010526085	0.066315685	0.038249084	0.066315685	0.002080178	0.025527946
1147	ENSG00000108861	DUSP3	4.79E-05	0.000725646	-0.407798916	0.100305005	11.00160047	0.0619633	0.00143361	0.013658031	0.010733457	0.013658031	0.002083582	0.025544094
1148	ENSG00000183598	HIST2H3D	4.82E-05	0.000730136	0.344327502	0.084727366	11.53484823	0.041791034	0.000726515	0.007051742	0.010041575	0.010041575	0.001368926	0.023761104
1149	ENSG00000079739	PGM1	4.83E-05	0.000730419	-0.332927163	0.081928043	12.07239409	0.038320139	0.00048079	0.005854198	0.009587517	0.009587517	0.001192006	0.023508736
1150	ENSG00000106263	EIF3B	4.84E-05	0.000730849	0.374609241	0.09219766	12.94359735	0.052300115	0.000652974	0.012097639	0.009222979	0.012097639	0.002090285	0.025590151
1151	ENSG00000258818	RNASE4	4.84E-05	0.000730849	-1.54832735	0.381058716	7.517199247	0.893442168	0.061758617	0.15605	0.032046321	0.15605	0.002089973	0.025590151
1152	ENSG00000187498	COL4A1	4.93E-05	0.000742719	0.348217022	0.085785771	12.0084176	0.038864904	0.001406911	0.001703558	0.009631887	0.009631887	0.000724644	0.020960732
1153	ENSG00000184009	ACTG1	4.94E-05	0.000744888	0.412505039	0.101645714	17.52075651	0.05625201	6.47E-05	0.006440201	0.015433118	0.015433118	0.000884027	0.021935234
1154	ENSG00000100994	PYGB	4.97E-05	0.000748394	0.397417406	0.097959324	9.881595973	0.050695485	0.000961467	0.003180166	0.013432577	0.013432577	0.000733175	0.021001637
1155	ENSG00000003147	ICA1	5.01E-05	0.000753906	-0.793201152	0.195608419	10.51438503	0.234665604	0.005969621	0.051424359	0.011665935	0.051424359	0.002112259	0.025740299
1156	ENSG00000007908	SELE	5.04E-05	0.000756802	-2.906115457	0.716931523	5.071026259	3.150441084	0.154466027	0.616520185	0.098056745	0.616520185	0.002116374	0.025740299
1157	ENSG00000068137	PLEKHH3	5.04E-05	0.000756802	-0.715222989	0.176435537	8.74921197	0.190818576	0.013819589	0.032874659	0.019133016	0.032874659	0.002115856	0.025740299
1158	ENSG00000166140	ZFYVE19	5.04E-05	0.000756802	-0.439441041	0.108409118	10.01376494	0.072035573	0.004566346	0.013062459	0.012992292	0.013062459	0.002116384	0.025740299
1159	ENSG00000073331	ALPK1	5.06E-05	0.000757491	-0.959923444	0.236858749	7.84704294	0.343758386	0.008627162	0.075525938	0.027645062	0.075525938	0.002118632	0.025740299
1160	ENSG00000165861	ZFYVE1	5.06E-05	0.000757491	-0.583362906	0.143942548	8.771762142	0.126957033	0.005212611	0.025866575	0.018977443	0.025866575	0.002118569	0.025740299
1161	ENSG00000172575	RASGRP1	5.06E-05	0.000757491	-1.51152079	0.372945783	4.606332473	0.739506611	0.085764034	-0.018141433	0.122868801	0.122868801	0.000776762	0.021384958
1162	ENSG00000119411	BSPRY	5.07E-05	0.000757935	-1.384896956	0.341748435	5.805001063	0.715532265	0.040360408	0.134827581	0.069316155	0.134827581	0.002119562	0.025740299
1163	ENSG00000095752	IL11	5.14E-05	0.000767747	2.16703235	0.535178569	8.612893586	1.752508083	0.009910566	0.419713586	0.020122627	0.419713586	0.002128419	0.025740299
1164	ENSG00000136492	BRIP1	5.15E-05	0.000768053	0.460892045	0.113831928	9.019402949	0.067340384	0.002032701	0.002484724	0.01740386	0.01740386	0.000686314	0.020763537
1165	ENSG00000100413	POLR3H	5.24E-05	0.000781073	0.43637609	0.107890799	9.860518523	0.06896599	0.003954513	0.01084394	0.013506124	0.013506124	0.001696603	0.024418719
1166	ENSG00000124587	PEX6	5.24E-05	0.000781073	-0.322661673	0.079777034	12.74226605	0.035554762	0.000278004	0.005123991	0.009268559	0.009268559	0.00111513	0.023345859
1167	ENSG00000114115	RBP1	5.28E-05	0.000785325	-0.999512619	0.247228512	9.537592475	0.373053968	0.007160607	0.084522299	0.014764278	0.084522299	0.002145937	0.025834528
1168	ENSG00000183828	NUDT14	5.28E-05	0.000785325	-0.658652948	0.162916423	9.04427686	0.161997225	0.002791671	0.03702097	0.017258321	0.03702097	0.002145884	0.025834528
1169	ENSG00000196588	MRTFA	5.31E-05	0.000789331	0.568633753	0.140699526	12.01764209	0.120758931	0.004518115	0.025176419	0.009625335	0.025176419	0.00214983	0.025851628
1170	ENSG00000145592	RPL37	5.34E-05	0.000792312	-0.371427909	0.091933249	15.23158097	0.051529674	5.52E-05	0.012622394	0.010340595	0.012622394	0.002153426	0.025851628
1171	ENSG00000161547	SRSF2	5.34E-05	0.000792312	0.427938363	0.105919784	13.78536211	0.068402174	0.000594525	0.016233976	0.009277403	0.016233976	0.002153369	0.025851628
1172	ENSG00000181381	DDX60L	5.40E-05	0.00080113	-0.879127097	0.217746156	6.875744188	0.266255028	0.028381032	0.014613583	0.042739051	0.042739051	0.001192217	0.023508736
1173	ENSG00000143590	EFNA3	5.41E-05	0.000801379	-0.949751052	0.235254512	6.441419785	0.33702174	0.018968819	0.064048209	0.051904166	0.064048209	0.002162046	0.025851628
1174	ENSG00000112578	BYSL	5.42E-05	0.000801933	0.407649531	0.100984358	9.952899359	0.053500261	0.002106073	0.00245245	0.013190688	0.013190688	0.000766664	0.02128865
1175	ENSG00000244219	TMEM225B	5.43E-05	0.000803251	-0.829901727	0.205615947	6.862751063	0.219272127	0.020429153	-0.004615323	0.042987724	0.042987724	0.000716462	0.020929171
1176	ENSG00000164616	FBXL21	5.46E-05	0.000805878	-0.547461642	0.13567124	8.781325684	0.093420151	0.0086979	-0.004315555	0.018912128	0.018912128	0.000632205	0.020744939
1177	ENSG00000112242	E2F3	5.48E-05	0.000808116	0.343665692	0.085184751	11.5033479	0.038393079	0.000810071	0.002891487	0.010074591	0.010074591	0.000816718	0.021797996
1178	ENSG00000103966	EHD4	5.48E-05	0.0008082	0.433635647	0.107491657	12.01413495	0.07027731	0.000381374	0.016950311	0.00962782	0.016950311	0.002170475	0.025851628
1179	ENSG00000088298	EDEM2	5.56E-05	0.000817866	-0.480607655	0.119230522	10.84168577	0.086354216	0.001186329	0.020137547	0.011007129	0.020137547	0.002179603	0.025851628
1180	ENSG00000099622	CIRBP	5.56E-05	0.000817866	-0.33364373	0.082774758	12.5809417	0.038081506	0.000955885	0.004901695	0.009321605	0.009321605	0.001143879	0.023405725
1181	ENSG00000177954	RPS27	5.56E-05	0.000817866	-0.347693703	0.086258248	15.72686338	0.045195856	6.12E-05	0.011099564	0.011028671	0.011099564	0.002179789	0.025851628
1182	ENSG00000173281	PPP1R3B	5.57E-05	0.000818237	-0.816314714	0.202537527	8.796077668	0.249136654	0.006012104	0.055520071	0.018812142	0.055520071	0.002180951	0.025851628
1183	ENSG00000179855	GIPC3	5.64E-05	0.000828783	-1.752822869	0.43524312	6.669359067	1.149040291	0.031103019	0.253051841	0.046866246	0.253051841	0.002190095	0.025851628
1184	ENSG00000179344	HLA-DQB1	5.65E-05	0.000829619	-1.717718506	0.426572552	4.635109485	1.10352403	0.119305745	0.153640469	0.121173209	0.153640469	0.002191341	0.025851628
1185	ENSG00000100359	SGSM3	5.66E-05	0.000829711	-0.665566526	0.165293814	9.638375375	0.165680094	0.00774764	0.033235427	0.01434331	0.033235427	0.002191982	0.025851628
1186	ENSG00000277669	AC009086.2	5.68E-05	0.000832639	-4.973413615	1.235465222	2.668268326	9.252102074	1.234913856	1.054647617	0.304981559	1.054647617	0.002194921	0.025851628
1187	ENSG00000108784	NAGLU	5.71E-05	0.000835067	-0.616380486	0.153158638	8.034113768	0.142126553	0.006660994	0.028525358	0.025469439	0.028525358	0.002198019	0.025851628
1188	ENSG00000166793	YPEL4	5.71E-05	0.000835067	-2.771902674	0.688764309	4.175216301	2.874308859	0.178957575	0.532636836	0.151103148	0.532636836	0.00219802	0.025851628
1189	ENSG00000082014	SMARCD3	5.74E-05	0.000836297	-0.48237631	0.119902688	10.1252879	0.087058057	0.001422952	0.02014203	0.012649192	0.02014203	0.002202016	0.025851628
1190	ENSG00000114315	HES1	5.72E-05	0.000836297	-0.570257057	0.141717995	10.21764436	0.121658721	0.001502489	0.028623496	0.012388378	0.028623496	0.002199659	0.025851628
1191	ENSG00000114735	HEMK1	5.74E-05	0.000836297	-0.436964976	0.108610875	10.60481327	0.070322834	0.006221803	0.010079843	0.011472681	0.011472681	0.001952221	0.025084311
1192	ENSG00000120696	KBTBD7	5.75E-05	0.000836297	-0.659032872	0.163819321	9.280510975	0.162501422	0.003330659	0.036924496	0.015973759	0.036924496	0.002202418	0.025851628
1193	ENSG00000137070	IL11RA	5.74E-05	0.000836297	-1.143222565	0.284155361	7.932629317	0.488980473	0.009884514	0.11123189	0.026621366	0.11123189	0.002201541	0.025851628
1194	ENSG00000168002	POLR2G	5.73E-05	0.000836297	-0.397648014	0.098828559	11.43844482	0.059157684	0.000766481	0.013884145	0.010145345	0.013884145	0.002200439	0.025851628
1195	ENSG00000262634	SKA1	5.78E-05	0.000839987	0.388468719	0.096593371	10.24290848	0.056468719	0.001628718	0.012366701	0.01232042	0.012366701	0.002205967	0.025875802
1196	ENSG00000180964	TCEAL8	5.80E-05	0.000842328	-0.542356164	0.13488632	11.03844031	0.110078246	0.000960074	0.026331405	0.010675318	0.026331405	0.002208423	0.025887126
1197	ENSG00000176490	DIRAS1	5.83E-05	0.000846409	-1.042638207	0.259394788	6.270790886	0.406871116	0.018489661	0.082438822	0.056048656	0.082438822	0.002212277	0.025894628
1198	ENSG00000062524	LTK	5.85E-05	0.000847169	-0.937197941	0.233197709	6.432992705	0.2889463	0.029470773	0.002334609	0.052100984	0.052100984	0.000897014	0.021978746
1199	ENSG00000168936	TMEM129	5.85E-05	0.000847169	-0.593880668	0.147769716	10.74455937	0.132011341	0.001472057	0.031281776	0.011191266	0.031281776	0.002213845	0.025894628
1200	ENSG00000198597	ZNF536	5.87E-05	0.000849582	-0.541588406	0.134789483	10.36674364	0.109797246	0.003443871	0.023808436	0.012006025	0.023808436	0.002216532	0.025894628
1201	ENSG00000111057	KRT18	5.88E-05	0.000850003	0.37854929	0.094224564	14.72007595	0.053643792	8.50E-05	0.01323241	0.009814126	0.01323241	0.002218006	0.025894628
1202	ENSG00000135423	GLS2	5.88E-05	0.000850003	-1.763598012	0.438967608	4.761093083	1.164314458	0.153939469	0.135099373	0.114006596	0.135099373	0.00221777	0.025894628
1203	ENSG00000229295	HLA-DPB1	5.95E-05	0.000859179	-1.026611276	0.255707045	8.691373835	0.394642525	0.017868085	0.080211055	0.019542348	0.080211055	0.002225924	0.02590459
1204	ENSG00000137409	MTCH1	5.96E-05	0.000859243	-0.316918127	0.078941772	13.13567625	0.036007179	0.000147072	0.007197989	0.009200633	0.009200633	0.001609822	0.024229408
1205	ENSG00000198589	LRBA	5.96E-05	0.000859501	-0.430092328	0.107139672	9.961036563	0.069083689	0.004054621	0.012932711	0.013163743	0.013163743	0.002182051	0.025851628
1206	ENSG00000157184	CPT2	5.97E-05	0.000860314	-0.361349172	0.090024557	10.9806194	0.048387265	0.001389271	0.010129851	0.010767361	0.010767361	0.002057031	0.025409899
1207	ENSG00000169764	UGP2	5.99E-05	0.000861963	-0.476933935	0.118839877	10.10553704	0.085187293	0.002134381	0.019049993	0.01270766	0.019049993	0.002230426	0.025909166
1208	ENSG00000071246	VASH1	6.00E-05	0.000862198	-1.006904275	0.250911321	8.562594693	0.379704655	0.005797157	0.088637579	0.020510427	0.088637579	0.002231183	0.025909166
1209	ENSG00000154721	JAM2	6.01E-05	0.00086357	-0.588590534	0.146692222	8.365914813	0.120532054	0.010119169	0.010631342	0.022158743	0.022158743	0.001306221	0.023761104
1210	ENSG00000197070	ARRDC1	6.06E-05	0.000869396	-0.537947797	0.134136823	8.755304765	0.10720966	0.007898267	0.01759337	0.019090764	0.019090764	0.002056891	0.025409899
1211	ENSG00000198911	SREBF2	6.06E-05	0.000869396	-0.646813482	0.16127687	9.922182505	0.156722579	0.003098391	0.035916952	0.013293605	0.035916952	0.002238225	0.025921629
1212	ENSG00000104419	NDRG1	6.16E-05	0.000882217	-0.696366843	0.173796772	7.941846718	0.181724415	0.012562312	0.032745665	0.026513981	0.032745665	0.002249347	0.025995652
1213	ENSG00000113532	ST8SIA4	6.18E-05	0.00088552	-1.164296733	0.290659256	5.277441869	0.439898554	0.037939696	0.003588416	0.088784509	0.088784509	0.000837437	0.021797996
1214	ENSG00000235568	NFAM1	6.20E-05	0.000887258	-1.390198082	0.34711113	5.214006544	0.68660839	0.089207237	0.044309236	0.091521968	0.091521968	0.001520568	0.024150465
1215	ENSG00000151065	DCP1B	6.22E-05	0.000888991	-0.514773926	0.128552202	9.420219701	0.098552797	0.00949745	0.014321473	0.015291053	0.015291053	0.002125663	0.025740299
1216	ENSG00000197586	ENTPD6	6.29E-05	0.000898131	0.513009686	0.1281953	9.414757378	0.098674523	0.004562	0.020089052	0.015316585	0.020089052	0.002264134	0.026065297
1217	ENSG00000102271	KLHL4	6.31E-05	0.000900668	-0.554196581	0.138523996	8.561533495	0.107406242	0.008264599	0.01081801	0.020518748	0.020518748	0.001367563	0.023761104
1218	ENSG00000110786	PTPN5	6.31E-05	0.000900668	-2.57948641	0.644748163	3.713480131	2.418116052	0.435513136	0.091975626	0.188037155	0.188037155	0.001795071	0.024533325
1219	ENSG00000136830	FAM129B	6.33E-05	0.000901438	0.349043048	0.087253566	10.73464671	0.04378563	0.000209123	0.008836271	0.011210654	0.011210654	0.001656899	0.024329495
1220	ENSG00000143476	DTL	6.36E-05	0.000906181	0.423041909	0.105789733	11.59353339	0.061654508	0.006804936	0.003151528	0.009982266	0.009982266	0.001237712	0.023761104
1221	ENSG00000121741	ZMYM2	6.39E-05	0.000909253	-0.397833649	0.099510692	10.94897552	0.059315822	0.00403396	0.010758963	0.010819607	0.010819607	0.002261535	0.026052646
1222	ENSG00000163629	PTPN13	6.43E-05	0.00091426	-0.634950497	0.15888045	11.1775328	0.131467654	0.027393511	-0.014244743	0.010470985	0.010470985	0.000872898	0.021935234
1223	ENSG00000177679	SRRM3	6.44E-05	0.00091489	-1.142297383	0.285856815	6.797250886	0.489509935	0.024321545	0.098249633	0.044263553	0.098249633	0.002281209	0.026156551
1224	ENSG00000124207	CSE1L	6.45E-05	0.000915121	0.31977976	0.080029089	14.27274008	0.033847759	0.000114835	0.003847704	0.009492148	0.009492148	0.000958306	0.02222942
1225	ENSG00000089127	OAS1	6.46E-05	0.000916734	-1.390641442	0.348079504	6.949960674	0.725556295	0.054711257	0.127027754	0.04134578	0.127027754	0.002283794	0.026156551
1226	ENSG00000109270	LAMTOR3	6.49E-05	0.000920208	-0.470573895	0.117817435	9.855674306	0.083089075	0.002445109	0.018376314	0.013523163	0.018376314	0.002287059	0.026156551
1227	ENSG00000164414	SLC35A1	6.52E-05	0.000922868	-0.480429636	0.12031144	10.12286264	0.086613602	0.001745428	0.019966836	0.012656318	0.019966836	0.002289691	0.026156551
1228	ENSG00000126822	PLEKHG3	6.57E-05	0.000929771	0.386465135	0.09682793	11.53755058	0.056057368	0.003210639	0.010852833	0.010038782	0.010852833	0.002295584	0.026156551
1229	ENSG00000164603	BMT2	6.59E-05	0.00093217	-0.721680239	0.180851719	9.635282507	0.195495523	0.000982587	0.04807843	0.014355823	0.04807843	0.002298007	0.026156551
1230	ENSG00000010278	CD9	6.61E-05	0.000932686	-0.648042904	0.162418126	11.39665348	0.157643459	0.001200941	0.038368531	0.010192929	0.038368531	0.002299473	0.026156551
1231	ENSG00000065150	IPO5	6.61E-05	0.000932686	0.370012778	0.092741199	10.20464228	0.04313455	0.000477497	0.002099645	0.012423898	0.012423898	0.000717675	0.020929171
1232	ENSG00000178573	MAF	6.62E-05	0.000932686	-1.013966882	0.254155656	8.351461309	0.385952768	0.013165315	0.083727331	0.022288813	0.083727331	0.002300728	0.026156551
1233	ENSG00000181804	SLC9A9	6.62E-05	0.000932686	-2.636573417	0.660867386	1.988258849	2.372606202	0.240991464	0.117946519	0.414127089	0.414127089	0.001174536	0.023471746
1234	ENSG00000137959	IFI44L	6.63E-05	0.00093295	-1.322529191	0.331520302	8.010702945	0.656611891	0.009346156	0.155512411	0.025729257	0.155512411	0.002301528	0.026156551
1235	ENSG00000169393	ELSPBP1	6.63E-05	0.00093295	-3.012510154	0.755185615	1.397595812	3.077725883	0.318312722	0.125638096	0.537145247	0.537145247	0.00112721	0.023388857
1236	ENSG00000110002	VWA5A	6.69E-05	0.000940093	-0.869116827	0.217982355	10.46946345	0.283628786	0.002127385	0.069147076	0.011765907	0.069147076	0.002308149	0.026156551
1237	ENSG00000101400	SNTA1	6.71E-05	0.000940989	-0.697465454	0.174957245	8.464426816	0.182669463	0.005980141	0.039934915	0.021305496	0.039934915	0.002309987	0.026156551
1238	ENSG00000135924	DNAJB2	6.71E-05	0.000940989	-0.447090447	0.112151478	9.504457172	0.066721432	0.003958067	0.004485023	0.014908864	0.014908864	0.001021236	0.022653971
1239	ENSG00000173432	SAA1	6.73E-05	0.00094302	-3.281296837	0.82325011	3.389340638	4.043361572	0.381759705	0.634851411	0.218837582	0.634851411	0.002312132	0.026156551
1240	ENSG00000160058	BSDC1	6.76E-05	0.000947665	-0.384532361	0.096508861	10.30220517	0.053261668	0.001804776	0.009322883	0.012166165	0.012166165	0.001704347	0.024428978
1241	ENSG00000157514	TSC22D3	6.78E-05	0.000948487	-1.743339344	0.437582107	8.938499014	1.141543341	0.00122391	0.285993241	0.01789225	0.285993241	0.002317469	0.026156551
1242	ENSG00000128284	APOL3	6.80E-05	0.000951711	-1.082516626	0.271782153	6.645968907	0.44019132	0.016689362	0.094108946	0.047358938	0.094108946	0.002320507	0.026156551
1243	ENSG00000104808	DHDH	6.82E-05	0.00095183	-1.636195804	0.410831719	4.262625556	0.871141974	0.108247131	-0.023245928	0.144926921	0.144926921	0.000876696	0.021935234
1244	ENSG00000186994	KANK3	6.82E-05	0.00095183	-2.313506115	0.580900733	3.38579034	1.696690858	0.286968869	-0.17322175	0.219199623	0.219199623	0.000751032	0.021164144
1245	ENSG00000189221	MAOA	6.83E-05	0.000953568	-0.694355415	0.17437378	9.227893598	0.181126291	0.017932115	0.027677207	0.016245531	0.027677207	0.002323668	0.026156551
1246	ENSG00000146411	SLC2A12	6.85E-05	0.000955475	-1.287827725	0.323466817	9.318117493	0.623107013	0.00387452	0.153071652	0.01578414	0.153071652	0.002325702	0.026156551
1247	ENSG00000118640	VAMP8	6.87E-05	0.000956664	-0.745632662	0.187308146	8.038642806	0.20889163	0.012346144	0.040280368	0.025419582	0.040280368	0.002327377	0.026156551
1248	ENSG00000185339	TCN2	6.87E-05	0.000956664	-1.215609775	0.30537956	7.088608498	0.555220149	0.021438347	0.118446666	0.038861226	0.118446666	0.00232777	0.026156551
1249	ENSG00000020129	NCDN	6.93E-05	0.000963506	0.38786985	0.09748959	10.55656641	0.056397755	0.002681792	0.011399269	0.011574538	0.011574538	0.002290855	0.026156551
1250	ENSG00000138623	SEMA7A	6.93E-05	0.000963506	1.30780981	0.328708627	10.25018603	0.642769184	0.003624973	0.15844907	0.012301099	0.15844907	0.002333967	0.026175388
1251	ENSG00000158089	GALNT14	6.94E-05	0.000963945	-0.384067408	0.096541108	10.22802545	0.054699402	0.001619992	0.011438846	0.012360286	0.012360286	0.002112791	0.025740299
1252	ENSG00000082068	WDR70	6.95E-05	0.000964138	-0.44474042	0.111798856	10.00327096	0.071649949	0.005722491	0.00966718	0.013025985	0.013025985	0.001782836	0.024533325
1253	ENSG00000171365	CLCN5	6.96E-05	0.000964448	-0.678373835	0.170541042	9.314183635	0.145756112	0.027822571	-0.018199078	0.0158038	0.0158038	0.000752337	0.021164144
1254	ENSG00000110042	DTX4	6.98E-05	0.000966472	-1.485852	0.373603168	5.105998293	0.692048291	0.112959043	-0.075807243	0.096409948	0.096409948	0.000709742	0.020897703
1255	ENSG00000163814	CDCP1	6.99E-05	0.000967367	0.389152941	0.097858846	9.951869305	0.050916426	0.001170422	0.005685106	0.013194108	0.013194108	0.001080938	0.023012331
1256	ENSG00000104960	PTOV1	7.02E-05	0.000970321	-0.377180057	0.094869892	11.99342122	0.053479794	0.00101796	0.012482484	0.00964265	0.012482484	0.002342785	0.026185697
1257	ENSG00000085117	CD82	7.05E-05	0.00097307	-0.842186552	0.211886321	9.657278168	0.266658432	0.004586197	0.062757522	0.014267376	0.062757522	0.00234603	0.026185697
1258	ENSG00000146352	CLVS2	7.04E-05	0.00097307	-2.753143515	0.692638779	3.469037811	2.661340706	0.508766917	-0.024515741	0.210855801	0.210855801	0.001438749	0.024037964
1259	ENSG00000124785	NRN1	7.06E-05	0.000973904	-0.445718522	0.112153024	11.2083742	0.074693461	0.000918162	0.01794929	0.010428755	0.01794929	0.002347603	0.026185697
1260	ENSG00000182195	LDOC1	7.06E-05	0.000973904	-0.698465642	0.175753205	7.753922739	0.179291639	0.017519952	0.023649252	0.028813831	0.028813831	0.001983532	0.025260397
1261	ENSG00000196376	SLC35F1	7.07E-05	0.000973933	-1.617761652	0.407110937	7.337258324	0.984033007	0.015863721	0.232745251	0.034756293	0.232745251	0.002348958	0.026185697
1262	ENSG00000242259	C22orf39	7.08E-05	0.000973933	-0.475749143	0.119723188	10.38775627	0.085101544	0.002768622	0.01873184	0.011955501	0.01873184	0.002349015	0.026185697
1263	ENSG00000113369	ARRDC3	7.12E-05	0.000978777	-0.410494472	0.103337347	9.540210837	0.056180977	0.001264924	0.005771656	0.014752986	0.014752986	0.001030445	0.022653971
1264	ENSG00000101017	CD40	7.14E-05	0.000981635	-1.89582412	0.477358417	5.070595605	1.351689998	0.108685332	0.233121255	0.098077226	0.233121255	0.002355989	0.026185697
1265	ENSG00000169241	SLC50A1	7.16E-05	0.000983414	-0.766192511	0.192953298	10.09931285	0.22079246	0.002457114	0.053389349	0.012726293	0.053389349	0.002357911	0.026190306
1266	ENSG00000107518	ATRNL1	7.17E-05	0.000984233	-0.559927245	0.141023919	8.375835662	0.11547407	0.007761428	0.019011715	0.022070191	0.022070191	0.002020342	0.025407055
1267	ENSG00000125089	SH3TC1	7.18E-05	0.000984233	-1.355140391	0.34131978	7.070385797	0.690720675	0.024396472	0.150352316	0.039179317	0.150352316	0.002359696	0.02619338
1268	ENSG00000168938	PPIC	7.19E-05	0.000985561	-0.615944934	0.155158211	10.81209944	0.142705333	0.000991558	0.035119548	0.011061784	0.035119548	0.002361279	0.026193404
1269	ENSG00000100029	PES1	7.21E-05	0.000986129	0.466122749	0.117431245	11.9050207	0.081729242	0.001020869	0.019664277	0.009708921	0.019664277	0.002362714	0.026193404
1270	ENSG00000126803	HSPA2	7.21E-05	0.000986129	-0.421920293	0.106296601	9.634363646	0.063308888	0.002588906	0.00979093	0.014359545	0.014359545	0.00157792	0.024229408
1271	ENSG00000042317	SPATA7	7.27E-05	0.000993133	-0.778163952	0.196140383	7.719452126	0.227827001	0.008459967	0.049246608	0.02926112	0.049246608	0.002368764	0.026216213
1272	ENSG00000169740	ZNF32	7.27E-05	0.000993133	-0.454037544	0.114447529	9.748167078	0.077562912	0.002610096	0.017037259	0.013914841	0.017037259	0.002369299	0.026216213
1273	ENSG00000229689	AC009237.3	7.30E-05	0.000996862	0.667759142	0.168365401	8.897396716	0.167786972	0.004493984	0.038026379	0.018149566	0.038026379	0.002372675	0.026219539
1274	ENSG00000148180	GSN	7.31E-05	0.000996992	-0.813369807	0.205090225	13.13209487	0.248945533	0.000834871	0.06225813	0.009200861	0.06225813	0.002373357	0.026219539
1275	ENSG00000159111	MRPL10	7.33E-05	0.000998475	-0.392509027	0.098988866	11.36208386	0.057977556	0.001781737	0.012916457	0.010233541	0.012916457	0.002375636	0.026219539
1276	ENSG00000271503	CCL5	7.33E-05	0.000998475	-1.33396331	0.336409661	5.819394438	0.669643186	0.044387281	0.125369909	0.068857418	0.125369909	0.00237529	0.026219539
1277	ENSG00000176014	TUBB6	7.40E-05	0.001006591	0.347322536	0.087639879	11.26643806	0.045406781	0.000644041	0.010877081	0.010352099	0.010877081	0.002382278	0.026275281
1278	ENSG00000228405	RNF5	7.43E-05	0.001009396	-0.388304873	0.098001993	10.30085807	0.056755526	0.002236995	0.012164659	0.012169591	0.012169591	0.002383712	0.026275281
1279	ENSG00000075624	ACTB	7.45E-05	0.00101232	0.353389723	0.08920971	16.21256331	0.045237024	4.10E-05	0.009673704	0.011896594	0.011896594	0.001804779	0.024533325
1280	ENSG00000048140	TSPAN17	7.46E-05	0.00101278	-0.40050605	0.101111289	11.70485072	0.06038972	0.001433686	0.013901553	0.009877137	0.013901553	0.00238864	0.02628307
1281	ENSG00000062038	CDH3	7.47E-05	0.001013571	-2.605691909	0.657891872	2.016424845	2.326213342	0.240263585	0.12139172	0.408968988	0.408968988	0.001240496	0.023761104
1282	ENSG00000274386	TMEM269	7.57E-05	0.001025455	-1.873389452	0.473353247	3.532531397	1.205113045	0.131402769	0.058893024	0.204692176	0.204692176	0.001262323	0.023761104
1283	ENSG00000093009	CDC45	7.63E-05	0.001032541	0.460395301	0.116382925	9.89109051	0.079843132	0.003845423	0.016472054	0.013399757	0.016472054	0.002405003	0.026379038
1284	ENSG00000115073	ACTR1B	7.64E-05	0.001033793	-0.543633581	0.137441195	10.68227011	0.11132934	0.000870029	0.027465094	0.01131445	0.027465094	0.002406514	0.026379038
1285	ENSG00000143036	SLC44A3	7.65E-05	0.001033887	-1.76384794	0.44595867	7.682969143	1.172002829	0.029326521	0.268992182	0.029743182	0.268992182	0.002407175	0.026379038
1286	ENSG00000011304	PTBP1	7.67E-05	0.001035512	0.380973099	0.096336183	12.72010421	0.054678943	0.001593248	0.012327743	0.009274971	0.012327743	0.002408959	0.026379038
1287	ENSG00000143815	LBR	7.68E-05	0.001036707	0.383948348	0.097099861	10.5522154	0.05553896	0.001417309	0.012725265	0.011583861	0.012725265	0.002410427	0.026379038
1288	ENSG00000130066	SAT1	7.71E-05	0.001039943	-0.844170607	0.213539542	9.950618782	0.268506167	0.002035577	0.066363127	0.013198263	0.066363127	0.002413392	0.026379038
1289	ENSG00000185561	TLCD2	7.74E-05	0.001042562	-1.091775857	0.27622824	8.754179408	0.449154805	0.005655221	0.108797839	0.019098555	0.108797839	0.002415902	0.026379038
1290	ENSG00000054148	PHPT1	7.77E-05	0.001046211	-0.348208319	0.08812233	11.74819893	0.045693364	0.000773648	0.010874669	0.009838541	0.010874669	0.002419163	0.026398048
1291	ENSG00000162782	TDRD5	7.82E-05	0.001052741	-1.281443328	0.32443696	5.284890562	0.555881851	0.069419714	0.009646223	0.088469297	0.088469297	0.00116257	0.023430891
1292	ENSG00000122378	PRXL2A	7.84E-05	0.001054486	-0.588918917	0.149124986	11.07411193	0.130733561	0.001734741	0.031622652	0.01062067	0.031622652	0.002426384	0.026460229
1293	ENSG00000160908	ZNF394	7.89E-05	0.0010596	-0.407401812	0.10319666	9.990863944	0.055126265	0.002908233	0.00375851	0.013066093	0.013066093	0.001035776	0.022653971
1294	ENSG00000275482	EPHB6	7.91E-05	0.001061647	-0.768521328	0.194701737	8.335447089	0.210092435	0.034428748	0.00670241	0.022434402	0.022434402	0.001610193	0.024229408
1295	ENSG00000090971	NAT14	7.93E-05	0.001063028	-0.695975493	0.17635299	9.35094059	0.182635019	0.004010625	0.04263994	0.01562192	0.04263994	0.002434967	0.026494046
1296	ENSG00000138764	CCNG2	7.93E-05	0.001063028	-0.65815143	0.16676842	9.083913304	0.163323039	0.00438406	0.037333499	0.017030698	0.037333499	0.002434941	0.026494046
1297	ENSG00000146215	CRIP3	7.97E-05	0.001067113	-1.709159325	0.43320444	4.665725439	1.088944144	0.16210562	0.103614961	0.119393509	0.119393509	0.00224057	0.025931502
1298	ENSG00000164967	RPP25L	8.01E-05	0.001072608	-0.71731716	0.181876846	10.05791535	0.194058197	0.002054279	0.047564502	0.012852828	0.047564502	0.002443091	0.026536265
1299	ENSG00000094804	CDC6	8.02E-05	0.00107311	0.457983161	0.116131056	10.80809488	0.07910828	0.00105589	0.019173743	0.011069283	0.019173743	0.002444049	0.026536265
1300	ENSG00000186951	PPARA	8.04E-05	0.001074883	-0.755173358	0.19151792	6.935303508	0.192839471	0.013401338	0.01379045	0.041617332	0.041617332	0.001163013	0.023430891
1301	ENSG00000111300	NAA25	8.06E-05	0.001076543	0.401530337	0.10184558	11.80766245	0.056951391	0.005771226	0.004958034	0.009787557	0.009787557	0.001542573	0.024150465
1302	ENSG00000108375	RNF43	8.09E-05	0.001079014	-0.569769856	0.144545358	9.608579256	0.113937052	0.016875136	0.003807046	0.014464905	0.014464905	0.001478849	0.024117947
1303	ENSG00000118579	MED28	8.11E-05	0.00108102	-0.750027652	0.190305487	10.11039194	0.212221858	0.005788713	0.048535554	0.012693196	0.048535554	0.002452138	0.026557437
1304	ENSG00000276886	AC243948.1	8.12E-05	0.001082115	0.940822829	0.238742059	10.82485901	0.333941603	0.001813315	0.083683341	0.011038052	0.083683341	0.002453523	0.026557437
1305	ENSG00000173992	CCS	8.22E-05	0.001093589	-0.444014457	0.112750235	9.408516335	0.063354782	0.003723052	0.00153961	0.015345871	0.015345871	0.000863176	0.021930866
1306	ENSG00000108797	CNTNAP1	8.25E-05	0.001095997	-0.441527841	0.11214602	9.48098386	0.061055776	0.003851872	-0.000637215	0.015013222	0.015013222	0.000748315	0.021137777
1307	ENSG00000131979	GCH1	8.25E-05	0.001095997	-0.450605331	0.114455247	9.90803842	0.076633553	0.001774804	0.017875201	0.013341645	0.017875201	0.002465873	0.026557437
1308	ENSG00000142046	TMEM91	8.24E-05	0.001095997	-0.988814326	0.251148769	6.200712778	0.369016976	0.033476229	0.061137327	0.0578528	0.061137327	0.00246519	0.026557437
1309	ENSG00000265190	ANXA8	8.27E-05	0.001097446	1.881419338	0.477947519	4.746932691	1.336042214	0.185373085	0.15727766	0.114791683	0.15727766	0.002467508	0.02655858
1310	ENSG00000160183	TMPRSS3	8.28E-05	0.001098579	-1.704902238	0.433153321	5.712194811	0.978735206	0.209074799	-0.075665158	0.0723579	0.0723579	0.001141905	0.023398461
1311	ENSG00000173801	JUP	8.31E-05	0.001101349	-0.776285831	0.197265336	9.373157646	0.227482242	0.002080183	0.056290236	0.015514129	0.056290236	0.002471494	0.026585012
1312	ENSG00000188042	ARL4C	8.35E-05	0.001105415	0.770058593	0.195736045	11.62869276	0.22387219	0.000634573	0.056834326	0.009948051	0.056834326	0.002474994	0.026606181
1313	ENSG00000102934	PLLP	8.40E-05	0.001111094	-1.778514654	0.452249818	3.642793625	1.194370191	0.090763112	0.216031735	0.19438657	0.216031735	0.002480163	0.026625322
1314	ENSG00000138639	ARHGAP24	8.40E-05	0.001111094	-0.870473786	0.221349777	6.427793614	0.245535341	0.02127078	0.001501667	0.052222806	0.052222806	0.000912087	0.022069866
1315	ENSG00000134590	RTL8C	8.42E-05	0.001112122	-0.413593298	0.105182047	9.424794982	0.053344842	0.001325155	0.001208616	0.015269739	0.015269739	0.000736279	0.021001637
1316	ENSG00000182670	TTC3	8.48E-05	0.001119602	-0.362993368	0.092355977	12.41287945	0.049764807	0.000815193	0.011979247	0.009392715	0.011979247	0.002487474	0.026625322
1317	ENSG00000105373	NOP53	8.50E-05	0.001120107	-0.400597126	0.101935736	11.18158854	0.06061249	0.003867209	0.011719133	0.010465371	0.011719133	0.002489035	0.026625322
1318	ENSG00000135622	SEMA4F	8.50E-05	0.001120107	-0.708441295	0.180265813	8.971335459	0.189561637	0.015588522	0.033155123	0.017691197	0.033155123	0.002488763	0.026625322
1319	ENSG00000168310	IRF2	8.51E-05	0.001121001	-0.705303779	0.179488329	7.563597587	0.179596492	0.016941085	0.021009498	0.031383005	0.031383005	0.00180757	0.024533325
1320	ENSG00000084092	NOA1	8.56E-05	0.001124471	-0.385466063	0.098126106	10.09825862	0.051477826	0.00171364	0.006914611	0.012729459	0.012729459	0.001377243	0.023761104
1321	ENSG00000121064	SCPEP1	8.56E-05	0.001124471	-0.840977766	0.21408541	9.249892571	0.267172156	0.004601008	0.064147836	0.016130967	0.064147836	0.002494532	0.026634394
1322	ENSG00000185222	TCEAL9	8.56E-05	0.001124471	-0.372802747	0.094902213	10.94416912	0.052502282	0.001165118	0.012344527	0.010827661	0.012344527	0.002494373	0.026634394
1323	ENSG00000157593	SLC35B2	8.59E-05	0.001127887	-0.524801225	0.133628227	12.22331234	0.104052702	0.000414958	0.026369796	0.009492669	0.026369796	0.002497549	0.026634394
1324	ENSG00000143368	SF3B4	8.63E-05	0.001131993	0.351898639	0.089626774	11.05551964	0.042578263	0.001400484	0.0053851	0.010648954	0.010648954	0.001314984	0.023761104
1325	ENSG00000109381	ELF2	8.68E-05	0.001138592	-0.38801564	0.098865395	10.66815357	0.053593892	0.003318706	0.007215108	0.011342843	0.011342843	0.001649755	0.024329495
1326	ENSG00000135404	CD63	8.72E-05	0.001142614	-0.500080337	0.127452658	13.12478785	0.094517119	0.00028512	0.02408115	0.00920135	0.02408115	0.002509729	0.026731462
1327	ENSG00000214706	IFRD2	8.73E-05	0.001142689	0.372100341	0.094839889	10.35375277	0.050169293	0.00145426	0.009335357	0.012037647	0.012037647	0.001861795	0.024859045
1328	ENSG00000189060	H1F0	8.78E-05	0.001148208	-1.097562467	0.279839352	10.95013279	0.455365086	0.001111243	0.116353851	0.010817672	0.116353851	0.002514861	0.026752079
1329	ENSG00000121104	FAM117A	8.82E-05	0.001152951	-1.042044367	0.265763792	6.13466556	0.410513411	0.031409702	0.074535888	0.059611112	0.074535888	0.002518785	0.026752079
1330	ENSG00000059915	PSD	8.85E-05	0.001156401	-1.692819451	0.431837212	5.355557922	1.029334439	0.194183122	0.017870792	0.085541944	0.085541944	0.001759562	0.024533325
1331	ENSG00000185420	SMYD3	8.87E-05	0.001157384	-0.504310668	0.128662015	8.831823806	0.084006383	0.006257231	0.003377279	0.01857364	0.01857364	0.00103672	0.022653971
1332	ENSG00000146197	SCUBE3	8.89E-05	0.001158883	-0.732905824	0.187005767	10.48112922	0.203110672	0.00153509	0.050921645	0.011739671	0.050921645	0.002524745	0.026777369
1333	ENSG00000117122	MFAP2	8.95E-05	0.001166976	-0.992836896	0.253449102	12.65401687	0.372801268	0.000311312	0.096043359	0.009295743	0.096043359	0.002530986	0.026809927
1334	ENSG00000143845	ETNK2	9.12E-05	0.001188072	-0.591823405	0.151253197	8.168465413	0.129596752	0.01027024	0.020380096	0.024046054	0.024046054	0.002169667	0.025851628
1335	ENSG00000112333	NR2E1	9.13E-05	0.001188409	-0.737528614	0.188503307	6.835391218	0.195196322	0.009784149	0.030230582	0.043516096	0.043516096	0.001759009	0.024533325
1336	ENSG00000114388	NPRL2	9.21E-05	0.001197294	-0.407710116	0.104258474	10.28068676	0.057573358	0.004083425	0.005547946	0.012221319	0.012221319	0.00139925	0.023831142
1337	ENSG00000196497	IPO4	9.25E-05	0.001201729	0.858786027	0.219666645	10.66076533	0.279158154	0.003298961	0.069081191	0.011357779	0.069081191	0.002557384	0.026945236
1338	ENSG00000163879	DNALI1	9.37E-05	0.001216225	-1.187175206	0.303903747	6.7927705	0.533644476	0.029524044	0.109012188	0.044352202	0.109012188	0.002567879	0.027011366
1339	ENSG00000119707	RBM25	9.42E-05	0.001220918	0.407821043	0.104432236	11.35871211	0.062982711	0.00145508	0.014904058	0.010237564	0.014904058	0.002572299	0.027014359
1340	ENSG00000147246	HTR2C	9.42E-05	0.001220918	-0.790533396	0.202432079	8.408007526	0.236657411	0.006341704	0.055126416	0.02178709	0.055126416	0.00257212	0.027014359
1341	ENSG00000140650	PMM2	9.43E-05	0.001221619	0.431606274	0.110532043	9.30962013	0.067804668	0.002499342	0.012400003	0.015826657	0.015826657	0.001948112	0.025056446
1342	ENSG00000182674	KCNB2	9.46E-05	0.001224655	-0.720454303	0.184541355	7.8734549	0.196582935	0.009668302	0.041414965	0.027324013	0.041414965	0.002576068	0.027014359
1343	ENSG00000115468	EFHD1	9.48E-05	0.001226083	-1.852459433	0.474555899	8.156478209	1.299725746	0.010217628	0.327587324	0.02416841	0.327587324	0.002577653	0.027014359
1344	ENSG00000079313	REXO1	9.50E-05	0.001227324	0.467082577	0.119668434	9.251331988	0.071224032	0.005357282	0.001860457	0.016123519	0.016123519	0.000989031	0.022517537
1345	ENSG00000115084	SLC35F5	9.55E-05	0.001233182	-0.390103072	0.099982895	10.14616101	0.049263373	0.002406403	0.002105161	0.012588466	0.012588466	0.00094449	0.022202546
1346	ENSG00000166333	ILK	9.55E-05	0.001233182	-0.314691818	0.080656554	12.48816756	0.033796446	0.000399375	0.00470958	0.009358845	0.009358845	0.00128827	0.023761104
1347	ENSG00000105379	ETFB	9.63E-05	0.001241835	-0.356111247	0.091316314	11.66323881	0.048050969	0.000763577	0.011744426	0.009915356	0.011744426	0.002590764	0.027040141
1348	ENSG00000103811	CTSH	9.66E-05	0.001245332	-0.789632428	0.202527275	8.832947043	0.236276568	0.006057652	0.055468294	0.018566231	0.055468294	0.002593736	0.027040141
1349	ENSG00000181195	PENK	9.72E-05	0.001251442	-1.704461032	0.437318347	5.360096764	1.101053028	0.048322262	0.238548743	0.085357759	0.238548743	0.002598459	0.027040141
1350	ENSG00000123815	COQ8B	9.75E-05	0.001252877	-0.695481984	0.178481695	9.784157855	0.183335415	0.004986817	0.042796756	0.01378077	0.042796756	0.002601481	0.027040141
1351	ENSG00000126878	AIF1L	9.75E-05	0.001252877	-0.925171015	0.237424699	9.076337294	0.324427007	0.008046998	0.076508734	0.017073805	0.076508734	0.002601359	0.027040141
1352	ENSG00000163435	ELF3	9.76E-05	0.001252877	-2.186677997	0.561207594	8.390761702	1.812412955	0.013469419	0.458961526	0.021938077	0.458961526	0.002602443	0.027040141
1353	ENSG00000185344	ATP6V0A2	9.77E-05	0.001252877	0.410131653	0.105260331	10.52322831	0.063758077	0.004315334	0.012304272	0.011646582	0.012304272	0.002602528	0.027040141
1354	ENSG00000231584	FAHD2CP	9.75E-05	0.001252877	-0.861346005	0.221041604	8.038482788	0.281206351	0.010495385	0.062793701	0.025421342	0.062793701	0.002601126	0.027040141
1355	ENSG00000104369	JPH1	9.81E-05	0.001256978	0.688813484	0.176836232	7.774108804	0.166923417	0.018350999	0.012379267	0.02855558	0.02855558	0.001569051	0.024229408
1356	ENSG00000183773	AIFM3	9.81E-05	0.001256978	-2.201501802	0.565161013	2.908924349	1.58106357	0.205876308	-0.047025664	0.273234147	0.273234147	0.000994747	0.022517537
1357	ENSG00000134697	GNL2	9.87E-05	0.0012639	0.361852871	0.092933018	10.25090791	0.046953907	0.00065563	0.008935191	0.012299188	0.012299188	0.001778773	0.024533325
1358	ENSG00000197165	SULT1A2	9.99E-05	0.001277665	-1.955117358	0.502485934	4.378397623	1.356586938	0.241626859	0.020675358	0.137111312	0.137111312	0.001666299	0.024329495
1359	ENSG00000138035	PNPT1	0.000100432	0.001281925	0.446899466	0.114897579	10.66973062	0.075757484	0.002724532	0.017077649	0.011339662	0.017077649	0.002626271	0.027156897
1360	ENSG00000162654	GBP4	0.000100368	0.001281925	-1.385810323	0.356276793	6.518666634	0.728460859	0.012461626	0.177938104	0.050136219	0.177938104	0.002625728	0.027156897
1361	ENSG00000185909	KLHDC8B	0.000100312	0.001281925	-1.235637158	0.317657897	6.436927556	0.579127603	0.024318693	0.127041116	0.052008986	0.127041116	0.002625256	0.027156897
1362	ENSG00000130038	CRACR2A	0.000100649	0.001283752	0.541462574	0.139228447	9.073157575	0.088385251	0.011984888	-0.011446468	0.017091953	0.017091953	0.000660757	0.020744939
1363	ENSG00000162032	SPSB3	0.000101043	0.001287832	-0.588292396	0.151306889	10.10481937	0.131298912	0.005542661	0.028798001	0.012709804	0.028798001	0.002631438	0.027185694
1364	ENSG00000177842	ZNF620	0.000101383	0.001291216	-0.580855934	0.149425588	8.38146989	0.117254682	0.011471846	0.008573901	0.022020164	0.022020164	0.001463387	0.024117947
1365	ENSG00000138185	ENTPD1	0.000102047	0.001298726	-1.884475303	0.484980495	5.219393084	1.347621447	0.12176953	0.231039591	0.09128578	0.231039591	0.00263989	0.027200571
1366	ENSG00000140274	DUOXA2	0.000102496	0.001303479	-2.238212919	0.576174872	3.549614779	1.674979039	0.29490346	-0.079778563	0.203062766	0.203062766	0.001161809	0.023430891
1367	ENSG00000146166	LGSN	0.000102869	0.001307268	-1.29439651	0.333287472	5.008572201	0.624562365	0.065541585	0.086863	0.101079223	0.101079223	0.00233031	0.026167249
1368	ENSG00000117643	MAN1C1	0.000103438	0.001313541	-1.035997889	0.266845902	7.328644813	0.40743557	0.035274536	0.071535567	0.034891488	0.071535567	0.002651516	0.027285613
1369	ENSG00000108829	LRRC59	0.000103987	0.001318585	0.369556178	0.095219552	12.2177882	0.051851646	0.000202899	0.013397245	0.0094959	0.013397245	0.002656081	0.027285613
1370	ENSG00000110888	CAPRIN2	0.000103976	0.001318585	0.504564556	0.130004815	9.622538186	0.079257565	0.01094423	-0.007341795	0.014407648	0.014407648	0.000787396	0.021507292
1371	ENSG00000177098	SCN4B	0.00010423	0.001320702	-0.922736269	0.237786261	7.890983697	0.323283434	0.037642293	0.047171166	0.027113479	0.047171166	0.002658096	0.027285613
1372	ENSG00000064195	DLX3	0.000104482	0.001322934	-2.119051226	0.546155679	3.701131423	1.704791526	0.258296827	0.188800794	0.189132211	0.189132211	0.002657234	0.027285613
1373	ENSG00000040731	CDH10	0.000104714	0.001323936	-2.293572881	0.591218232	4.892372389	1.997589765	0.075189391	0.449119106	0.106965795	0.449119106	0.002662102	0.027285613
1374	ENSG00000114019	AMOTL2	0.000104706	0.001323936	0.717330019	0.184906525	9.75234451	0.195397214	0.001608263	0.049677371	0.013899123	0.049677371	0.002662037	0.027285613
1375	ENSG00000162236	STX5	0.00010481	0.001324185	-0.529614522	0.136527485	10.70235097	0.106515168	0.001640351	0.026319281	0.011274376	0.026319281	0.002662895	0.027285613
1376	ENSG00000148843	PDCD11	0.000104894	0.001324287	0.413960188	0.106718739	9.32823855	0.053281692	0.001349586	0.00099139	0.015733748	0.015733748	0.000784815	0.021470556
1377	ENSG00000149273	RPS3	0.00010504	0.001325162	-0.435850986	0.112371953	16.07260008	0.072142771	7.92E-05	0.018862033	0.011625312	0.018862033	0.002664794	0.027285613
1378	ENSG00000100600	LGMN	0.000105336	0.001327936	-0.479154494	0.123558384	9.735720493	0.087196718	0.00089617	0.022003842	0.013961921	0.022003842	0.002667237	0.027285613
1379	ENSG00000235220	HLA-F	0.000105743	0.001332105	-0.973599159	0.251120436	8.292800861	0.339125758	0.071762507	-0.003316055	0.022829703	0.022829703	0.001777306	0.024533325
1380	ENSG00000111052	LIN7A	0.000106156	0.00133634	-1.570391868	0.405150358	6.657620697	0.93681536	0.043999425	0.202220794	0.047112841	0.202220794	0.002673982	0.027308888
1381	ENSG00000108424	KPNB1	0.000106908	0.001344692	0.394183522	0.101741753	13.33038092	0.059035856	0.000513435	0.015013642	0.009198935	0.015013642	0.002680136	0.02732594
1382	ENSG00000131171	SH3BGRL	0.000107113	0.001344692	-0.602479337	0.155523244	9.495777343	0.137919381	0.001701709	0.03457951	0.014947264	0.03457951	0.002681813	0.02732594
1383	ENSG00000176204	LRRTM4	0.000107044	0.001344692	-1.46735578	0.378765824	5.0401861	0.739593296	0.115659323	0.001407428	0.099536001	0.099536001	0.001380761	0.023761104
1384	ENSG00000180884	ZNF792	0.00010713	0.001344692	-0.923736952	0.238454519	8.136522722	0.324219656	0.008765328	0.076525509	0.024374104	0.076525509	0.002681944	0.02732594
1385	ENSG00000110871	COQ5	0.000107305	0.001345919	-0.400230046	0.103326462	9.472215395	0.055355702	0.000961913	0.008163681	0.015052624	0.015052624	0.001433363	0.024037964
1386	ENSG00000142192	APP	0.000107821	0.001350443	-0.313200009	0.08088253	13.94429346	0.036291019	0.000480642	0.008097789	0.009332333	0.009332333	0.002229346	0.025909166
1387	ENSG00000155876	RRAGA	0.000107755	0.001350443	-0.426412184	0.110114828	10.41032381	0.069098536	0.001560584	0.016627329	0.011902071	0.016627329	0.002687037	0.027345756
1388	ENSG00000120158	RCL1	0.000107944	0.001351011	0.427264459	0.110347098	9.262626944	0.068026671	0.002199453	0.014375791	0.01606527	0.01606527	0.002342682	0.026185697
1389	ENSG00000106772	PRUNE2	0.000108772	0.001359872	-0.852942985	0.220390669	8.613772565	0.276539977	0.015425553	0.057432517	0.020115964	0.057432517	0.00269529	0.027381903
1390	ENSG00000154553	PDLIM3	0.000108809	0.001359872	-1.146365837	0.296213967	10.79454062	0.499537647	0.001372561	0.130241511	0.011094846	0.130241511	0.002695583	0.027381903
1391	ENSG00000137558	PI15	0.000108971	0.001360919	-2.344147431	0.605770273	4.36312784	2.088857302	0.172729008	0.377707428	0.138118968	0.377707428	0.002696894	0.027381903
1392	ENSG00000215475	SIAH3	0.000109234	0.001363229	-1.014106284	0.262103362	6.138342173	0.390961273	0.032668055	0.070379204	0.059511714	0.070379204	0.002699021	0.027387494
1393	ENSG00000179869	ABCA13	0.000110149	0.001373664	-2.00311291	0.517991963	4.470615979	1.525717208	0.170011697	0.232461814	0.13117134	0.232461814	0.002706388	0.027410221
1394	ENSG00000105963	ADAP1	0.000110274	0.001374238	-1.315614371	0.340233679	5.314543406	0.6581631	0.08388682	0.089751615	0.087227149	0.089751615	0.002707392	0.027410221
1395	ENSG00000011028	MRC2	0.000110729	0.001374968	-0.790974351	0.204608554	12.55241017	0.237929719	0.002180805	0.060616185	0.009332531	0.060616185	0.002711034	0.027410221
1396	ENSG00000182397	DNM1P46	0.000110679	0.001374968	-0.990858791	0.256307236	6.487204372	0.327651987	0.047691592	-0.006302037	0.050848507	0.050848507	0.001175272	0.023471746
1397	ENSG00000186231	KLHL32	0.000110667	0.001374968	-1.545664777	0.399817249	4.933051631	0.76042052	0.134911851	-0.080291053	0.104868898	0.104868898	0.000904409	0.022069866
1398	ENSG00000214435	AS3MT	0.000110712	0.001374968	-1.403884141	0.363152156	6.392644169	0.74952259	0.041532531	0.156286701	0.053054388	0.156286701	0.002710903	0.027410221
1399	ENSG00000250317	SMIM20	0.000110675	0.001374968	-0.385876025	0.099815003	9.981569554	0.052455218	0.001848218	0.007883189	0.013096334	0.013096334	0.001626942	0.024322925
1400	ENSG00000142459	EVI5L	0.000110855	0.001375553	-0.639749549	0.165501766	8.086498861	0.155652847	0.010399542	0.03068671	0.024900798	0.03068671	0.002712045	0.027410221
1401	ENSG00000101306	MYLK2	0.000110969	0.001375984	0.911948753	0.235934388	6.910371334	0.287895109	0.041414253	0.006585685	0.0420833	0.0420833	0.001460966	0.024117947
1402	ENSG00000168300	PCMTD1	0.000111333	0.001379511	-0.652785304	0.168919963	10.47982046	0.162079341	0.003184323	0.039616607	0.011742604	0.039616607	0.002715863	0.027410221
1403	ENSG00000089248	ERP29	0.000111553	0.001380836	-0.453173536	0.117281465	12.29414202	0.078115807	0.000402111	0.020230302	0.009452846	0.020230302	0.00271762	0.027410221
1404	ENSG00000102230	PCYT1B	0.000111629	0.001380836	-0.581996986	0.150627462	8.542568826	0.128842506	0.005960116	0.028072832	0.020668432	0.028072832	0.002718222	0.027410221
1405	ENSG00000184924	PTRHD1	0.000111678	0.001380836	-0.579328124	0.14994093	9.817216495	0.127665061	0.005898611	0.027824813	0.013660263	0.027824813	0.002718617	0.027410221
1406	ENSG00000186575	NF2	0.000111897	0.001382558	0.614021541	0.1589399	12.73285834	0.143421006	0.000399965	0.037492873	0.009271247	0.037492873	0.00272036	0.027411884
1407	ENSG00000138646	HERC5	0.000112337	0.001387003	-0.673837951	0.174466659	9.899834438	0.172743613	0.002020755	0.043637168	0.0133697	0.043637168	0.002723854	0.027414562
1408	ENSG00000138172	CALHM2	0.000112644	0.001389813	-0.926033529	0.239805311	6.891675916	0.326269333	0.012874223	0.073385658	0.042436093	0.073385658	0.002726294	0.027414562
1409	ENSG00000141068	KSR1	0.000113171	0.001395316	0.386849624	0.100207991	10.59328396	0.056090643	0.003565687	0.01042788	0.011496775	0.011496775	0.002456873	0.026557437
1410	ENSG00000113638	TTC33	0.000113524	0.001398682	-0.431244278	0.111729865	9.266433723	0.069126112	0.002679626	0.013988654	0.016045718	0.016045718	0.002322081	0.026156551
1411	ENSG00000158220	ESYT3	0.000113626	0.001398946	-1.063967975	0.275676136	6.597025185	0.41842539	0.065588716	0.032932577	0.048407282	0.048407282	0.002235943	0.025921629
1412	ENSG00000085872	CHERP	0.000114577	0.001409659	0.401654263	0.104124371	9.989277709	0.058368788	0.003191585	0.009272096	0.013071242	0.013071242	0.001943832	0.025056446
1413	ENSG00000132740	IGHMBP2	0.000114668	0.001409775	0.788227119	0.204349291	7.392733459	0.225685468	0.028740421	0.020378167	0.033897528	0.033897528	0.001995186	0.025318019
1414	ENSG00000277140	MARF1	0.000115477	0.001418716	-0.579174085	0.150218871	9.036282866	0.127711637	0.013820454	0.02002811	0.017304865	0.02002811	0.00274859	0.027552001
1415	ENSG00000150938	CRIM1	0.000115768	0.001421281	0.424423629	0.110099207	9.480111459	0.068586827	0.001533324	0.016649429	0.015017132	0.016649429	0.00275086	0.027552001
1416	ENSG00000116213	WRAP73	0.000115877	0.001421616	-0.466919005	0.121130122	10.42052206	0.083011015	0.003303551	0.018705209	0.0118782	0.018705209	0.002751711	0.027552001
1417	ENSG00000064666	CNN2	0.000116114	0.001423525	0.303982775	0.078870762	13.25960456	0.028721681	0.000133782	0.001116247	0.009197114	0.009197114	0.00081355	0.021797996
1418	ENSG00000007402	CACNA2D2	0.000116941	0.001432653	-1.766895122	0.458641764	4.53503283	1.088172175	0.188361609	0.00113422	0.127166792	0.127166792	0.001543652	0.024150465
1419	ENSG00000111186	WNT5B	0.000117028	0.001432712	0.825818253	0.21437192	8.517718945	0.25973912	0.008974496	0.059958484	0.020867435	0.059958484	0.00276067	0.027578044
1420	ENSG00000196352	CD55	0.000117111	0.001432715	0.341827469	0.08873805	11.45158575	0.040692854	0.001680947	0.005367864	0.010130716	0.010130716	0.001536167	0.024150465
1421	ENSG00000041802	LSG1	0.000117252	0.001433424	0.442108948	0.114779759	10.100852	0.074447368	0.001883729	0.017877861	0.012721676	0.017877861	0.0027624	0.027578044
1422	ENSG00000108406	DHX40	0.0001175	0.001434967	-0.575615968	0.149460784	9.313234362	0.126206354	0.002232808	0.031274981	0.01580855	0.031274981	0.002764323	0.027578044
1423	ENSG00000137509	PRCP	0.000117543	0.001434967	-0.665549523	0.172816381	8.947650729	0.168725452	0.002965188	0.041833064	0.017835819	0.041833064	0.002764656	0.027578044
1424	ENSG00000130311	DDA1	0.000119019	0.001451964	0.523398528	0.136013443	9.217775511	0.104383394	0.003955463	0.023794022	0.016298684	0.023794022	0.002776033	0.027667955
1425	ENSG00000177380	PPFIA3	0.000119331	0.001454744	-0.66799965	0.17361926	8.287161032	0.170039437	0.01758925	0.027626221	0.022882811	0.027626221	0.002778425	0.027675918
1426	ENSG00000139629	GALNT6	0.000119736	0.001458664	-0.770519664	0.200308448	7.022959103	0.213029999	0.020166201	0.02348359	0.040019011	0.040019011	0.0018598	0.024859045
1427	ENSG00000142396	ERVK3-1	0.000120031	0.001461233	0.34810844	0.090510339	10.59142937	0.0414864	0.000787517	0.005628176	0.011500665	0.011500665	0.001395332	0.02382953
1428	ENSG00000184985	SORCS2	0.000120499	0.001464891	-1.575962045	0.409861416	7.500569664	0.946680566	0.125710063	0.126269508	0.032287599	0.126269508	0.002787359	0.027696755
1429	ENSG00000213023	SYT3	0.0001205	0.001464891	-1.170172709	0.304327788	6.347488897	0.443321192	0.084779633	-0.044117206	0.05414347	0.05414347	0.001019697	0.022653971
1430	ENSG00000105810	CDK6	0.000121433	0.001475205	0.345683277	0.089946404	10.48134742	0.042044327	0.000396351	0.007347709	0.011739182	0.011739182	0.001650099	0.024329495
1431	ENSG00000106144	CASP2	0.000122618	0.001488552	0.610331732	0.158906113	10.56352694	0.14205283	0.01313698	0.024739749	0.011559673	0.024739749	0.002803443	0.027813484
1432	ENSG00000107816	LZTS2	0.00012369	0.001500522	-0.383329773	0.099859416	9.967673507	0.054888038	0.001815991	0.011690913	0.013141863	0.013141863	0.002435585	0.026494046
1433	ENSG00000135063	FAM189A2	0.000124394	0.001508004	-1.043583511	0.271957668	5.884391395	0.359334154	0.04411365	-0.003345912	0.066827809	0.066827809	0.001142177	0.023398461
1434	ENSG00000260727	SLC7A5P1	0.00012474	0.001511142	1.36040765	0.354585009	4.948893298	0.605413831	0.084532914	-0.02178149	0.104062879	0.104062879	0.001090687	0.023082285
1435	ENSG00000196169	KIF19	0.000124863	0.001511577	-2.418207916	0.63033633	2.71306938	1.92665496	0.297162275	-0.081742146	0.298823559	0.298823559	0.00113447	0.023393159
1436	ENSG00000101057	MYBL2	0.000125002	0.001512212	0.35627789	0.09287496	12.22272673	0.04843109	0.000417964	0.012520673	0.00949301	0.012520673	0.002821349	0.027927888
1437	ENSG00000117877	CD3EAP	0.000125128	0.00151268	0.865175557	0.225549554	10.85888764	0.285605745	0.008083848	0.068225054	0.01097595	0.068225054	0.002822288	0.027927888
1438	ENSG00000105755	ETHE1	0.000125241	0.001512991	-0.47162753	0.122959462	8.895499069	0.084872593	0.004431771	0.018246773	0.018161601	0.018246773	0.00282313	0.027927888
1439	ENSG00000005108	THSD7A	0.000125362	0.001513299	-1.498393044	0.390674934	5.152030007	0.851756151	0.134649541	0.088102505	0.094290816	0.094290816	0.002712897	0.027410221
1440	ENSG00000162636	FAM102B	0.00012544	0.001513299	-0.420019709	0.109515812	11.83940138	0.067317423	0.000560765	0.017429805	0.009761265	0.017429805	0.00282462	0.027927888
1441	ENSG00000119514	GALNT12	0.000127069	0.001531883	-0.805840172	0.210288419	7.116242963	0.247878978	0.005354865	0.060976964	0.038383569	0.060976964	0.002836716	0.028016523
1442	ENSG00000114270	COL7A1	0.000128077	0.001540823	0.970410092	0.253362325	9.833580738	0.359539685	0.003818975	0.092469727	0.013601525	0.092469727	0.002844156	0.028016523
1443	ENSG00000116396	KCNC4	0.000127985	0.001540823	0.616927344	0.161064865	8.699205956	0.133056838	0.019426805	0.004169487	0.019486032	0.019486032	0.001607481	0.024229408
1444	ENSG00000229215	HLA-A	0.000128018	0.001540823	-0.72584464	0.189503704	13.07089508	0.201149117	0.000239207	0.053628274	0.009205872	0.053628274	0.002843726	0.028016523
1445	ENSG00000128298	BAIAP2L2	0.000128174	0.001540929	0.613192394	0.160104936	8.752223546	0.143561783	0.005925195	0.032525191	0.019112111	0.032525191	0.002844874	0.028016523
1446	ENSG00000110711	AIP	0.000129621	0.001557247	-0.455350749	0.118978224	10.35749834	0.079190273	0.001093576	0.020140151	0.012028499	0.020140151	0.002855495	0.028047967
1447	ENSG00000154639	CXADR	0.000129843	0.001558828	-0.992416444	0.259336145	8.847684167	0.376173402	0.003781495	0.097101359	0.018469497	0.097101359	0.002857113	0.028047967
1448	ENSG00000140092	FBLN5	0.000129996	0.001558904	-0.915828407	0.239340575	6.748974886	0.320363194	0.034080534	0.051845333	0.045228262	0.051845333	0.002858238	0.028047967
1449	ENSG00000166250	CLMP	0.000130028	0.001558904	0.438057955	0.114482905	9.441970523	0.071280852	0.004469197	0.012671329	0.015190307	0.015190307	0.002366657	0.026216213
1450	ENSG00000153064	BANK1	0.000130363	0.001561844	-1.563115688	0.408575351	4.972854684	0.860960994	0.147545861	0.012406387	0.102854865	0.102854865	0.001693911	0.024418719
1451	ENSG00000275600	PIGW	0.000130857	0.001566671	0.493439227	0.129009082	9.439256191	0.08120261	0.009762216	0.000435195	0.015202799	0.015202799	0.001231178	0.023761104
1452	ENSG00000105701	FKBP8	0.000131026	0.001567385	-0.548166389	0.143329395	12.50296577	0.114797895	0.000813631	0.030001342	0.009352573	0.030001342	0.002865743	0.028071838
1453	ENSG00000128872	TMOD2	0.000131097	0.001567385	-0.405901188	0.106134901	9.916664692	0.062176403	0.003584629	0.01235246	0.013312297	0.013312297	0.002635173	0.027185694
1454	ENSG00000135390	ATP5MC2	0.000131546	0.001571675	-0.30329993	0.079324248	13.26726934	0.033806411	0.000241328	0.007520119	0.009197177	0.009197177	0.002210657	0.025894628
1455	ENSG00000139718	SETD1B	0.000132421	0.001581048	0.487602948	0.127580925	10.1978834	0.090859262	0.001910816	0.022504523	0.012442512	0.022504523	0.002875859	0.028127463
1456	ENSG00000167123	CERCAM	0.000132525	0.001581193	-0.637956941	0.166929311	8.988349004	0.155535191	0.002214844	0.039583248	0.017588561	0.039583248	0.002876604	0.028127463
1457	ENSG00000008118	CAMK1G	0.000132887	0.001582257	-3.044386278	0.796741646	1.614559076	3.225998915	0.463696602	0.093194113	0.488499275	0.488499275	0.001580807	0.024229408
1458	ENSG00000114805	PLCH1	0.000132706	0.001582257	-0.671423148	0.175701625	7.770569084	0.167602981	0.017705922	0.022744413	0.028600669	0.028600669	0.002388957	0.02628307
1459	ENSG00000135801	TAF5L	0.000132878	0.001582257	0.426023217	0.111493394	11.05717926	0.066278515	0.007999754	0.006787471	0.010646411	0.010646411	0.002126306	0.025740299
1460	ENSG00000111981	ULBP1	0.000133727	0.00159117	-0.524155648	0.137231792	8.895168477	0.105020821	0.004333065	0.023915782	0.018163699	0.023915782	0.002885271	0.028174772
1461	ENSG00000174125	TLR1	0.000134029	0.001593673	-1.164670902	0.304972722	5.027426307	0.434693133	0.039356979	-0.004662429	0.100155563	0.100155563	0.001001831	0.022541732
1462	ENSG00000275700	AATF	0.000134455	0.001597636	0.543635893	0.142381904	9.260931491	0.112989123	0.001306252	0.029102657	0.016073991	0.029102657	0.002890491	0.028209895
1463	ENSG00000105808	RASA4	0.000134705	0.001599512	-0.727842172	0.190649656	7.455821541	0.184767258	0.021574809	0.010726429	0.032946128	0.032946128	0.001605656	0.024229408
1464	ENSG00000198026	ZNF335	0.000134797	0.001599513	0.408593453	0.107030956	9.378260483	0.051607968	0.001693839	0.000210393	0.015489599	0.015489599	0.000838006	0.021797996
1465	ENSG00000151790	TDO2	0.000135341	0.001603785	-1.406852826	0.36862087	5.285784472	0.756828077	0.043449791	0.160372227	0.088431555	0.160372227	0.002896834	0.028255925
1466	ENSG00000235030	IER3	0.000135332	0.001603785	-0.303068244	0.079408987	13.16415055	0.034421518	0.000259612	0.008323399	0.009199069	0.009199069	0.002527184	0.026785995
1467	ENSG00000123096	SSPN	0.000135833	0.001608509	-0.971143517	0.254516805	8.274847	0.360670484	0.004625961	0.092542245	0.022999444	0.092542245	0.002900338	0.028274225
1468	ENSG00000095319	NUP188	0.000136246	0.001611212	0.401696129	0.105297042	9.474266859	0.051482253	0.001587816	0.002255083	0.015043385	0.015043385	0.00098504	0.022462043
1469	ENSG00000228987	HLA-DRA	0.000136238	0.001611212	-2.620139077	0.686817071	4.401518138	2.625599861	0.362851276	0.344725257	0.135598741	0.344725257	0.002903221	0.028276162
1470	ENSG00000166349	RAG1	0.000136379	0.00161169	-0.864649568	0.226665869	7.48438529	0.279985572	0.044541912	0.025082975	0.032524212	0.032524212	0.002519096	0.026752079
1471	ENSG00000169220	RGS14	0.000136776	0.001615278	-0.909447906	0.238454484	7.639227922	0.316361297	0.011180281	0.074110531	0.030332925	0.074110531	0.002907047	0.028276162
1472	ENSG00000119718	EIF2B2	0.000137097	0.001616875	-0.326101611	0.085515852	11.47179253	0.037006472	0.000860917	0.005518825	0.010108524	0.010108524	0.00159154	0.024229408
1473	ENSG00000157106	SMG1	0.000137036	0.001616875	0.39499589	0.103579473	10.13212454	0.056958072	0.003463878	0.009225554	0.012629183	0.012629183	0.002135167	0.025758414
1474	ENSG00000138604	GLCE	0.000137315	0.001618345	-0.345517083	0.090616623	10.7866818	0.045375554	0.001207262	0.01074391	0.011109797	0.011109797	0.002785726	0.027696755
1475	ENSG00000174428	GTF2IRD2B	0.000137624	0.00162089	-0.535753084	0.140529123	10.11564211	0.097291387	0.01694503	-0.002967559	0.012677622	0.012677622	0.001368608	0.023761104
1476	ENSG00000165359	INTS6L	0.000137908	0.001623128	-0.439728149	0.115356972	9.706097843	0.071194628	0.005885369	0.010597599	0.014075477	0.014075477	0.002258254	0.026032106
1477	ENSG00000087269	NOP14	0.000138561	0.001628609	0.318632063	0.083614603	11.76405321	0.038840285	0.000662376	0.009815583	0.009824727	0.009824727	0.002915901	0.028304878
1478	ENSG00000119227	PIGZ	0.000138539	0.001628609	-1.008654386	0.264685768	6.275431589	0.373668426	0.049156482	0.036410173	0.055931352	0.055931352	0.002224415	0.02590459
1479	ENSG00000181513	ACBD4	0.000139428	0.001637694	-1.462352335	0.383902128	6.215122761	0.818399318	0.048723808	0.172347458	0.057476736	0.172347458	0.002925769	0.028308885
1480	ENSG00000185345	PRKN	0.000139842	0.001641446	-2.334071056	0.612866888	4.110465322	1.845833437	0.407571918	-0.143238007	0.155836816	0.155836816	0.001371738	0.023761104
1481	ENSG00000140398	NEIL1	0.000139999	0.001642179	-1.8353412	0.4819484	5.241169873	1.289272309	0.108659384	0.239752006	0.090338046	0.239752006	0.002929772	0.028308885
1482	ENSG00000185924	RTN4RL1	0.000140203	0.001642347	-1.310952656	0.344279917	4.950130064	0.553799283	0.073792792	-0.026017513	0.1040002	0.1040002	0.001047174	0.022700864
1483	ENSG00000241978	AKAP2	0.00014018	0.001642347	0.486686433	0.127811338	11.84151588	0.090661991	0.0014669	0.023036708	0.009759536	0.023036708	0.002931038	0.028308885
1484	ENSG00000078808	SDF4	0.000140929	0.001648224	-0.339953303	0.089307885	13.48587316	0.044241552	0.001265523	0.010698324	0.009212724	0.010698324	0.002936273	0.028308885
1485	ENSG00000105894	PTN	0.000140899	0.001648224	-1.091317866	0.286692173	10.69167711	0.455923288	0.001383565	0.121905038	0.011295632	0.121905038	0.002936065	0.028308885
1486	ENSG00000124523	SIRT5	0.000140989	0.001648224	-0.456692204	0.119979245	11.05490547	0.072368483	0.010942634	0.001305056	0.010649895	0.010649895	0.001575923	0.024229408
1487	ENSG00000228451	SDAD1P1	0.000141178	0.001649322	-0.857812556	0.225378615	6.268795961	0.263148045	0.020094116	0.032900047	0.056099164	0.056099164	0.001888811	0.024859045
1488	ENSG00000227671	AL390728.4	0.000141497	0.001651937	0.582010577	0.152937825	8.513737083	0.129688867	0.005981031	0.029103936	0.020899629	0.029103936	0.002940229	0.028328822
1489	ENSG00000075391	RASAL2	0.000141965	0.00165629	0.663468111	0.174380298	10.26177865	0.168547166	0.002425402	0.043187331	0.01227055	0.043187331	0.002943486	0.028329216
1490	ENSG00000067182	TNFRSF1A	0.000142437	0.001659591	-0.477148355	0.125436683	11.9483308	0.087182399	0.00331153	0.020290012	0.009675847	0.020290012	0.002946761	0.028334887
1491	ENSG00000138182	KIF20B	0.000142439	0.001659591	0.34118879	0.089694603	13.22897963	0.037965612	0.002870493	0.00093285	0.009197189	0.009197189	0.001120995	0.023350027
1492	ENSG00000130707	ASS1	0.000142807	0.001662759	-0.982918273	0.258441251	10.89694815	0.369988756	0.002959149	0.097228672	0.010908496	0.097228672	0.002949324	0.028334887
1493	ENSG00000146072	TNFRSF21	0.000142991	0.001663788	0.631271865	0.165995878	12.11603892	0.152616808	0.000489592	0.040842356	0.009558677	0.040842356	0.002950599	0.028334887
1494	ENSG00000115009	CCL20	0.000144324	0.001677497	-1.574230119	0.414201587	4.410624433	0.854146501	0.122337114	0.016020836	0.135007318	0.135007318	0.001525486	0.024150465
1495	ENSG00000235162	C12orf75	0.000144362	0.001677497	0.482270658	0.126894208	9.78786555	0.089098065	0.00380338	0.02034983	0.01376713	0.02034983	0.002960065	0.028386627
1496	ENSG00000224597	SVIL-AS1	0.000144482	0.001677767	-0.685485199	0.180373414	8.222474461	0.18000847	0.007431137	0.041370716	0.023505922	0.041370716	0.002960889	0.028386627
1497	ENSG00000171951	SCG2	0.000145675	0.001690487	-1.083966247	0.285379729	4.909291424	0.419868452	0.01607349	0.068143516	0.106088895	0.106088895	0.001893517	0.024859045
1498	ENSG00000167100	SAMD14	0.000145931	0.001691854	-1.388493955	0.365595741	6.650063281	0.738766935	0.04515616	0.155334209	0.04727231	0.155334209	0.002970829	0.028433831
1499	ENSG00000184500	PROS1	0.000145987	0.001691854	-1.125231906	0.296285343	10.4329071	0.485186059	0.001791338	0.129886169	0.011849433	0.129886169	0.002971217	0.028433831
1500	ENSG00000163507	CIP2A	0.000147452	0.001707685	0.494680693	0.130339559	11.84690614	0.093798777	0.001376522	0.024106079	0.009755142	0.024106079	0.002981205	0.028433831
1501	ENSG00000099901	RANBP1	0.000147836	0.001709351	0.414739009	0.109294944	12.77064672	0.065936995	0.000373528	0.017544549	0.009260753	0.017544549	0.002983817	0.028433831
1502	ENSG00000104825	NFKBIB	0.000147793	0.001709351	0.465191368	0.122588178	9.777326364	0.082954336	0.002101391	0.020440401	0.013805985	0.020440401	0.002983526	0.028433831
1503	ENSG00000179632	MAF1	0.000147891	0.001709351	-0.31878815	0.084011331	11.56408497	0.034990415	0.000575179	0.005053133	0.010011676	0.010011676	0.001526594	0.024150465
1504	ENSG00000179542	SLITRK4	0.000148746	0.001718093	-1.855833165	0.489258567	4.11128728	1.237066317	0.203285054	0.051504065	0.155775864	0.155775864	0.001963187	0.025132263
1505	ENSG00000169860	P2RY1	0.000148896	0.001718689	-0.918521311	0.242168412	6.156389875	0.295623172	0.028941899	0.024206541	0.059026411	0.059026411	0.001692838	0.024418719
1506	ENSG00000244509	APOBEC3C	0.000149266	0.001721811	-0.393409419	0.10373934	10.19196767	0.052211594	0.003683887	0.003541491	0.012458889	0.012458889	0.001364904	0.023761104
1507	ENSG00000197859	ADAMTSL2	0.000149483	0.001723165	-1.892580344	0.499107722	3.770158368	1.099692096	0.190576085	-0.1591586	0.183086692	0.183086692	0.000844735	0.021804964
1508	ENSG00000126882	FAM78A	0.000150061	0.001728682	-0.861341688	0.227208838	8.285981222	0.284521478	0.021084894	0.056350891	0.022893946	0.056350891	0.002998866	0.028505193
1509	ENSG00000189067	LITAF	0.000150216	0.001729331	-0.468053051	0.123473674	9.08902659	0.084016995	0.001354193	0.021514429	0.01700171	0.021514429	0.002999915	0.028505193
1510	ENSG00000092330	TINF2	0.000151128	0.001737519	-0.447123988	0.117999294	10.03669895	0.076684558	0.004752094	0.016133656	0.012919384	0.016133656	0.003006039	0.028505193
1511	ENSG00000108947	EFNB3	0.000151115	0.001737519	-1.169017463	0.30851063	9.697197412	0.524195119	0.002835143	0.13993307	0.014110017	0.13993307	0.003005957	0.028505193
1512	ENSG00000111341	MGP	0.000151735	0.001742199	-2.786221574	0.735497796	11.71942078	2.978057607	0.004019183	0.80741633	0.009864029	0.80741633	0.003010111	0.028505193
1513	ENSG00000205220	PSMB10	0.000151665	0.001742199	-0.410106014	0.108255171	10.24028283	0.064519101	0.003961654	0.013617119	0.012327419	0.013617119	0.00300964	0.028505193
1514	ENSG00000068885	IFT80	0.000151959	0.001742334	-0.464408369	0.12260488	8.960831694	0.073809622	0.004792852	0.006591	0.017755082	0.017755082	0.001486254	0.024150465
1515	ENSG00000102007	PLP2	0.000152115	0.001742334	0.3253043	0.085886879	11.24396048	0.037641586	0.000683493	0.006684906	0.010381341	0.010381341	0.001860509	0.024859045
1516	ENSG00000134438	RAX	0.000152148	0.001742334	-2.378981453	0.628107853	3.575113076	2.171211012	0.391125951	0.200555531	0.200653261	0.200653261	0.003012139	0.028505193
1517	ENSG00000167733	HSD11B1L	0.000152024	0.001742334	-1.36226204	0.359650413	7.128716153	0.711945463	0.03859601	0.155426619	0.038169815	0.155426619	0.003012043	0.028505193
1518	ENSG00000101134	DOK5	0.000152653	0.001746957	-1.151658799	0.304131442	5.9997515	0.508890518	0.025193987	0.113549914	0.063387817	0.113549914	0.00301624	0.028505193
1519	ENSG00000162244	RPL29	0.000152769	0.001747144	-0.416480802	0.109990278	14.98050753	0.066554311	7.20E-05	0.01807476	0.010060099	0.01807476	0.003017019	0.028505193
1520	ENSG00000125510	OPRL1	0.000153596	0.001755438	-1.583784045	0.418416822	6.728540382	0.962598735	0.081950443	0.180658513	0.045643012	0.180658513	0.003022521	0.028505557
1521	ENSG00000028528	SNX1	0.000153785	0.001756448	-0.388255058	0.102580654	9.92477051	0.052209887	0.002499326	0.006234786	0.01328486	0.01328486	0.001596138	0.024229408
1522	ENSG00000131242	RAB11FIP4	0.000154859	0.001767547	-1.024374923	0.270773328	6.662193456	0.402785029	0.013370088	0.096607205	0.04701662	0.096607205	0.003030898	0.02856905
1523	ENSG00000164933	SLC25A32	0.000155076	0.001768867	0.324063962	0.085667831	11.49044506	0.039118072	0.000920105	0.008595941	0.010088361	0.010088361	0.002487452	0.026625322
1524	ENSG00000101079	NDRG3	0.000155274	0.00176982	-0.407594274	0.107758476	10.68327596	0.063774195	0.001692596	0.015725238	0.011312434	0.015725238	0.003033641	0.028569504
1525	ENSG00000160963	COL26A1	0.000155364	0.00176982	-2.858563391	0.755766674	4.709833625	3.136835316	0.522439488	0.334335409	0.116872827	0.334335409	0.003034235	0.028569504
1526	ENSG00000125846	ZNF133	0.000155654	0.001771965	-0.501026182	0.132481025	10.09154828	0.096369637	0.012822083	0.01350475	0.012749679	0.01350475	0.003036152	0.028572064
1527	ENSG00000114767	RRP9	0.00015599	0.001774631	0.409001895	0.108163385	10.91586976	0.064223946	0.001178167	0.01637081	0.010875731	0.01637081	0.00303837	0.028577455
1528	ENSG00000174136	RGMB	0.000156772	0.001782354	0.453904762	0.120077766	8.61744097	0.073432652	0.001539812	0.012989929	0.020088193	0.020088193	0.001896539	0.024859045
1529	ENSG00000164258	NDUFS4	0.000157616	0.001790782	-0.320724134	0.084875666	11.47822931	0.036933588	0.000704287	0.006888709	0.010101531	0.010101531	0.001984829	0.025260397
1530	ENSG00000187609	EXD3	0.000157849	0.001792253	-0.585101346	0.154854876	7.821330854	0.114843132	0.008008019	0.007167051	0.02796203	0.02796203	0.001346433	0.023761104
1531	ENSG00000108423	TUBD1	0.000158148	0.001793313	-0.598955859	0.158541487	9.57799793	0.13778692	0.010643114	0.027059991	0.014592175	0.027059991	0.003052539	0.028598828
1532	ENSG00000139219	COL2A1	0.000158088	0.001793313	-2.12137098	0.561505131	2.999559969	1.711444239	0.210836966	0.240887769	0.262095052	0.262095052	0.002857623	0.028047967
1533	ENSG00000158106	RHPN1	0.000158407	0.001795078	-0.45357661	0.120073073	10.01750785	0.079020574	0.003743628	0.017882686	0.012980326	0.017882686	0.003054232	0.028598828
1534	ENSG00000160293	VAV2	0.000159124	0.001802023	0.335514947	0.088845651	11.19894315	0.036811573	0.001398769	0.002401843	0.010441555	0.010441555	0.001179712	0.023471746
1535	ENSG00000198794	SCAMP5	0.000159626	0.001806534	-0.932126218	0.246881964	5.941085901	0.306134	0.026314128	0.03053114	0.065111928	0.065111928	0.001779714	0.024533325
1536	ENSG00000091513	TF	0.000160234	0.001812229	-2.879744304	0.762917354	1.912829831	3.184473482	0.444826227	0.425917904	0.428238108	0.428238108	0.003054159	0.028598828
1537	ENSG00000143554	SLC27A3	0.000160536	0.001814464	-0.82430219	0.21840574	7.919155877	0.261083511	0.030170792	0.041380809	0.026779335	0.041380809	0.003068088	0.028655285
1538	ENSG00000073737	DHRS9	0.000161665	0.001825992	1.823931779	0.483489765	4.340948158	1.167784245	0.211048506	0.001159126	0.139595023	0.139595023	0.001747226	0.024533325
1539	ENSG00000173406	DAB1	0.000161766	0.001825992	-1.800740164	0.477361918	3.985532309	1.071958822	0.176445693	-0.052496592	0.165365909	0.165365909	0.001255111	0.023761104
1540	ENSG00000186862	PDZD7	0.000161906	0.001826385	-0.841127526	0.222988976	7.103962219	0.251242509	0.035990984	0.012751334	0.038595141	0.038595141	0.001870192	0.024859045
1541	ENSG00000149792	MRPL49	0.000162543	0.00183238	-0.445859652	0.118231311	10.34521425	0.07641162	0.000693615	0.02027435	0.012058595	0.02027435	0.00308106	0.028715275
1542	ENSG00000118257	NRP2	0.000162871	0.0018337	0.332495314	0.088181572	11.78459618	0.037233965	0.001856918	0.003228113	0.009807066	0.009807066	0.001388917	0.023795138
1543	ENSG00000196449	YRDC	0.00016281	0.0018337	0.422129033	0.111950661	10.91229074	0.068497417	0.001156745	0.01764268	0.01088189	0.01764268	0.003082776	0.028715275
1544	ENSG00000103326	CAPN15	0.00016323	0.001836554	0.491329069	0.130325108	8.896927852	0.092020416	0.007324412	0.017174512	0.018152538	0.018152538	0.002916517	0.028304878
1545	ENSG00000117143	UAP1	0.000163644	0.001840019	0.768271071	0.203818187	13.06329918	0.226922356	0.000265203	0.062047577	0.009206639	0.062047577	0.003088139	0.028734417
1546	ENSG00000236697	GPSM3	0.000163808	0.001840667	-0.711614315	0.188799948	8.277165689	0.187386905	0.030490719	0.013844812	0.022977412	0.022977412	0.002409919	0.026379038
1547	ENSG00000173614	NMNAT1	0.000165198	0.001855084	-0.494153247	0.131178295	8.646533816	0.082663019	0.005941335	0.005817152	0.019870282	0.019870282	0.00143405	0.024037964
1548	ENSG00000138286	FAM149B1	0.00016541	0.001856262	-0.508092173	0.13488999	8.733814578	0.093603629	0.008052443	0.012142972	0.019240521	0.019240521	0.002129013	0.025740299
1549	ENSG00000061337	LZTS1	0.00016619	0.001863817	0.331916655	0.088145848	11.24170008	0.04113158	0.001270224	0.008831001	0.010384311	0.010384311	0.002556651	0.026945236
1550	ENSG00000092421	SEMA6A	0.000166426	0.001865264	-1.986280437	0.527538723	5.068940532	1.517549517	0.136589111	0.280856546	0.098155983	0.280856546	0.003105906	0.028809547
1551	ENSG00000134668	SPOCD1	0.000167871	0.001880246	1.12091903	0.297877224	11.29370583	0.48341485	0.001698997	0.131397263	0.010317344	0.131397263	0.003115068	0.028821924
1552	ENSG00000105997	HOXA3	0.000167986	0.001880318	1.079944719	0.287001584	7.208340938	0.44872807	0.017930014	0.105624849	0.036831652	0.105624849	0.003115794	0.028821924
1553	ENSG00000168763	CNNM3	0.00016856	0.001885524	-0.541833923	0.144028137	9.996299155	0.112968125	0.006891939	0.024224217	0.013048486	0.024224217	0.003119418	0.028840089
1554	ENSG00000162607	USP1	0.000169716	0.001897234	0.30823298	0.08197051	12.01360561	0.034783792	0.000450551	0.007401349	0.009628195	0.009628195	0.002271472	0.026097888
1555	ENSG00000165646	SLC18A2	0.000170512	0.001904914	-1.534799259	0.40828691	4.482346424	0.815230728	0.119613932	0.016071191	0.130433369	0.130433369	0.001634591	0.024329495
1556	ENSG00000184005	ST6GALNAC3	0.000170938	0.001908443	-0.704586368	0.187465007	8.323173668	0.191104339	0.012009994	0.040704699	0.022547034	0.040704699	0.00313437	0.028951041
1557	ENSG00000130147	SH3BP4	0.000171886	0.001917791	0.392360696	0.104431472	9.688312444	0.050691687	0.002214205	0.00342031	0.014144693	0.014144693	0.00125456	0.023761104
1558	ENSG00000122971	ACADS	0.00017299	0.001928877	-0.8114504	0.216069429	9.172646231	0.253558723	0.002728579	0.067300418	0.016539383	0.067300418	0.00314718	0.029042863
1559	ENSG00000170915	PAQR8	0.000173818	0.001936858	-0.515117618	0.137206903	10.36844561	0.102194729	0.001588562	0.026650039	0.012001905	0.026650039	0.003152319	0.029042863
1560	ENSG00000127080	IPPK	0.000174206	0.001939937	0.461622915	0.122976331	10.87168186	0.082076528	0.003447802	0.019236965	0.010953042	0.019236965	0.003154725	0.029042863
1561	ENSG00000166448	TMEM130	0.000175122	0.001948888	-2.392326128	0.6375388	3.982679723	2.077293946	0.444093848	0.00631447	0.165589734	0.165589734	0.00216955	0.025851628
1562	ENSG00000130303	BST2	0.00017585	0.001955738	-3.043744863	0.811362367	6.700203367	3.569285507	0.023076025	0.964387311	0.046224585	0.964387311	0.003164886	0.029073865
1563	ENSG00000171385	KCND3	0.000176215	0.00195854	-2.485079276	0.662532203	2.557214886	2.04510037	0.337666004	-0.09714767	0.320757376	0.320757376	0.001302523	0.023761104
1564	ENSG00000174371	EXO1	0.000176361	0.001958912	0.379144477	0.101087059	9.963422376	0.049120394	0.002172023	0.005322019	0.013155867	0.013155867	0.001538489	0.024150465
1565	ENSG00000176209	SMIM19	0.00017653	0.001959538	-0.368378526	0.098222947	10.24469213	0.048115765	0.002155947	0.007100232	0.012315674	0.012315674	0.001893427	0.024859045
1566	ENSG00000100532	CGRRF1	0.000177481	0.001968838	-0.687881775	0.183479913	8.139789307	0.182352255	0.014804829	0.035692489	0.024340261	0.035692489	0.003174916	0.029106853
1567	ENSG00000137691	CFAP300	0.000177781	0.001970908	-0.812952188	0.216864674	6.748462103	0.254703722	0.024411205	0.046134225	0.045238622	0.046134225	0.003176755	0.029106853
1568	ENSG00000108622	ICAM2	0.000178405	0.001976566	-0.765755115	0.204322217	7.163880628	0.226011351	0.021712153	0.0409092	0.037573282	0.0409092	0.003180576	0.029109442
1569	ENSG00000170017	ALCAM	0.000178672	0.001978258	0.299957037	0.080043885	12.5024047	0.031396044	0.000257727	0.005246994	0.009352808	0.009352808	0.001733945	0.024533325
1570	ENSG00000136156	ITM2B	0.000178993	0.001980326	-0.694027627	0.185224358	11.81072518	0.18567198	0.000880076	0.050582018	0.009784992	0.050582018	0.003184167	0.029109442
1571	ENSG00000169621	APLF	0.000179087	0.001980326	-0.569009033	0.151864299	8.032415886	0.124806702	0.006300548	0.0282936	0.025488164	0.0282936	0.003184738	0.029109442
1572	ENSG00000116096	SPR	0.000179948	0.00198859	-0.452566475	0.120825497	10.22142683	0.078963485	0.001266704	0.020631497	0.012378115	0.020631497	0.00318999	0.029116757
1573	ENSG00000063761	ADCK1	0.00018064	0.001994967	-0.562324065	0.150167037	8.019670328	0.117210142	0.00819589	0.019738655	0.025629318	0.025629318	0.002482872	0.026625322
1574	ENSG00000165115	KIF27	0.000180758	0.001994995	-0.473500737	0.126452527	9.986146999	0.077863053	0.010903943	0.002348768	0.01308142	0.01308142	0.001693787	0.024418719
1575	ENSG00000107223	EDF1	0.000181058	0.001996082	-0.297780615	0.079533794	13.70313658	0.032943903	0.000233818	0.007693575	0.009254619	0.009254619	0.002519365	0.026752079
1576	ENSG00000259917	HNRNPLP2	0.000181086	0.001996082	-0.809895594	0.216316048	6.621849546	0.221642776	0.022316359	0.008763034	0.04787259	0.04787259	0.001460281	0.024117947
1577	ENSG00000101412	E2F1	0.00018128	0.001996953	0.351888715	0.093993156	10.48545711	0.043368387	0.001522083	0.006253776	0.011729987	0.011729987	0.001777302	0.024533325
1578	ENSG00000206284	WDR46	0.000181706	0.002000382	0.350013677	0.093507052	10.79341246	0.041232194	0.002018367	0.003580785	0.011096987	0.011096987	0.001431357	0.024037964
1579	ENSG00000235106	BRD3OS	0.000181937	0.002001648	-0.576029826	0.153900922	9.690850407	0.127965701	0.003170612	0.032357629	0.014134768	0.032357629	0.003202054	0.029169418
1580	ENSG00000102409	BEX4	0.000182493	0.002006502	-0.931876654	0.24902546	8.590166383	0.334934645	0.005155022	0.087865498	0.020296269	0.087865498	0.003205419	0.02916948
1581	ENSG00000204186	ZDBF2	0.000183139	0.002012323	-0.364085513	0.09731766	11.30309631	0.05113235	0.002903309	0.011302781	0.010305555	0.011302781	0.003209312	0.029184173
1582	ENSG00000112787	FBRSL1	0.000183306	0.002012895	0.806432327	0.215567316	8.458814614	0.228664892	0.048351343	-0.00639514	0.021352559	0.021352559	0.001822412	0.024618149
1583	ENSG00000092621	PHGDH	0.000184065	0.002018694	-0.333709751	0.089228654	12.3128586	0.04087804	0.00249981	0.006836916	0.009442819	0.009442819	0.002347662	0.026185697
1584	ENSG00000144645	OSBPL10	0.000184067	0.002018694	-0.821734343	0.219718815	8.044949012	0.260505829	0.005984165	0.066430372	0.025350381	0.066430372	0.0032149	0.029191808
1585	ENSG00000196787	HIST1H2AG	0.00018503	0.002027978	0.401532945	0.107401266	14.22225947	0.06221065	0.000105719	0.017196829	0.009463463	0.017196829	0.003220681	0.029191808
1586	ENSG00000135124	P2RX4	0.000185393	0.002029397	-0.946687123	0.253251449	9.339922248	0.345828509	0.012771468	0.083432977	0.015675981	0.083432977	0.003222855	0.029191808
1587	ENSG00000157326	DHRS4	0.000185393	0.002029397	-0.438360691	0.117267342	9.727427581	0.074149984	0.003456567	0.017170878	0.013993496	0.017170878	0.003222856	0.029191808
1588	ENSG00000142082	SIRT3	0.000185571	0.002030066	-0.574585973	0.153719349	8.41234786	0.11893727	0.013695087	0.011170609	0.02174937	0.02174937	0.002102741	0.025706415
1589	ENSG00000198034	RPS4X	0.000185801	0.002031296	-0.294838561	0.078884904	13.80290529	0.031394401	5.15E-05	0.006592852	0.009282759	0.009282759	0.002134241	0.025758414
1590	ENSG00000130164	LDLR	0.000186582	0.002038121	-0.617375205	0.165227175	12.32313552	0.147105667	0.003169912	0.037780117	0.0094374	0.037780117	0.00322996	0.029239638
1591	ENSG00000185860	CCDC190	0.00018666	0.002038121	2.657464674	0.71123306	3.209961399	2.568105476	0.520933984	0.040903425	0.237844714	0.237844714	0.002225621	0.02590459
1592	ENSG00000040608	RTN4R	0.000187068	0.002041295	-0.569686055	0.152490895	7.756420652	0.116133255	0.006098483	0.017364761	0.028781727	0.028781727	0.002025603	0.025407055
1593	ENSG00000108179	PPIF	0.00018753	0.002045053	0.3825131	0.102406331	10.02704672	0.056479349	0.001458133	0.014272452	0.012949949	0.014272452	0.003235606	0.029265582
1594	ENSG00000150471	ADGRL3	0.000187881	0.002046654	-1.023004131	0.273913013	9.670590009	0.403995242	0.012579974	0.099962534	0.014214453	0.099962534	0.003237695	0.029265582
1595	ENSG00000186007	LEMD1	0.000187912	0.002046654	-1.366737583	0.365952944	6.884269411	0.721097355	0.030153398	0.170728939	0.042576668	0.170728939	0.00323788	0.029265582
1596	ENSG00000215115	CXorf49	0.00018835	0.002050135	-2.75424314	0.737582276	3.428314252	2.740548196	0.601141672	-0.020152155	0.214899748	0.214899748	0.002145326	0.025834528
1597	ENSG00000165948	IFI27L1	0.000188673	0.002052361	-0.55612371	0.148946301	8.461114281	0.119404075	0.006947277	0.026330224	0.021333252	0.026330224	0.003242393	0.029280044
1598	ENSG00000150776	NKAPD1	0.000188828	0.002052768	-0.380119324	0.101812804	11.42566083	0.049994285	0.005389042	0.002919802	0.010159729	0.010159729	0.001679891	0.024339499
1599	ENSG00000110011	DNAJC4	0.000189087	0.002054292	-0.859298238	0.230179384	7.470188772	0.285097097	0.015256969	0.064216853	0.03273322	0.064216853	0.003244846	0.029280044
1600	ENSG00000105404	RABAC1	0.000189602	0.002057414	-0.456357755	0.122266553	10.43100999	0.080417652	0.001335915	0.02108775	0.011853824	0.02108775	0.003247895	0.029280044
1601	ENSG00000123360	PDE1B	0.000189818	0.002057414	-0.922038659	0.247049952	7.625143332	0.328287001	0.019764537	0.071785981	0.03052556	0.071785981	0.003249174	0.029280044
1602	ENSG00000152578	GRIA4	0.000189966	0.002057414	-0.82413183	0.220828515	7.620289116	0.221935033	0.042555589	-0.019834275	0.030592261	0.030592261	0.001248656	0.023761104
1603	ENSG00000164430	CGAS	0.000189721	0.002057414	0.368852848	0.098826583	9.950669241	0.052390484	0.001451945	0.013016501	0.013198096	0.013198096	0.003190363	0.029116757
1604	ENSG00000168291	PDHB	0.000189889	0.002057414	-0.353886037	0.094822197	11.92347413	0.048360097	0.000589983	0.012896891	0.009694686	0.012896891	0.003249593	0.029280044
1605	ENSG00000162396	PARS2	0.000191074	0.00206812	-0.381716998	0.102322324	9.885172473	0.055360633	0.002284596	0.012275745	0.013420191	0.013420191	0.00292943	0.028308885
1606	ENSG00000204525	HLA-C	0.000191252	0.002068762	-0.540749424	0.144961388	13.13672128	0.112939546	0.000244654	0.031276052	0.009200567	0.031276052	0.003257629	0.029322625
1607	ENSG00000123496	IL13RA2	0.000191572	0.002070935	-0.302345693	0.081060469	12.29458396	0.035197244	0.000403592	0.009313118	0.009452607	0.009452607	0.003192921	0.029116757
1608	ENSG00000099783	HNRNPM	0.000192015	0.002074428	0.4950267	0.132739952	11.64249862	0.094659304	0.001063006	0.025366836	0.009934877	0.025366836	0.003262112	0.029347181
1609	ENSG00000087510	TFAP2C	0.000192728	0.002079547	0.669763054	0.179640004	7.067897789	0.157766421	0.009182856	0.019806715	0.039222941	0.039222941	0.001849279	0.024826648
1610	ENSG00000163673	DCLK3	0.000192633	0.002079547	-1.71969944	0.461232507	4.057605547	1.035050453	0.159299162	0.025501592	0.159803976	0.159803976	0.001799438	0.024533325
1611	ENSG00000175600	SUGCT	0.000192889	0.002079988	-0.824262196	0.221091326	6.674912305	0.2624801	0.02525738	0.048064682	0.04675005	0.048064682	0.003267236	0.02937807
1612	ENSG00000100092	SH3BP1	0.000193684	0.002084728	-0.631711248	0.169490646	9.382872941	0.154190225	0.00605806	0.037032559	0.015467499	0.037032559	0.003271887	0.029385935
1613	ENSG00000115425	PECR	0.000193518	0.002084728	-0.607374072	0.162951435	8.043190719	0.128676927	0.014460105	0.00804733	0.02536965	0.02536965	0.001768257	0.024533325
1614	ENSG00000116741	RGS2	0.000193688	0.002084728	-1.232246204	0.330617102	8.344320407	0.586698414	0.003070469	0.160891033	0.022353541	0.160891033	0.003271914	0.029385935
1615	ENSG00000080839	RBL1	0.000193889	0.002085597	0.413202289	0.11087177	10.08297531	0.06569706	0.005663141	0.012432134	0.012775683	0.012775683	0.003185416	0.029109442
1616	ENSG00000114796	KLHL24	0.00019438	0.002089583	-1.244206051	0.333906507	8.920071905	0.598206876	0.00683333	0.160407003	0.018006822	0.160407003	0.003275952	0.029385935
1617	ENSG00000167815	PRDX2	0.00019531	0.00209828	-0.91104923	0.244576501	11.48547616	0.320784407	0.000570877	0.08915562	0.010093702	0.08915562	0.003281368	0.02939862
1618	ENSG00000059691	GATB	0.000196137	0.002105862	-0.531040949	0.142601859	8.904472959	0.107914397	0.012398126	0.016743186	0.018104809	0.018104809	0.003079684	0.028715275
1619	ENSG00000160588	MPZL3	0.000196317	0.002106496	-0.617542085	0.16584057	7.870190097	0.145203071	0.013891193	0.024603311	0.027363449	0.027363449	0.002983	0.028433831
1620	ENSG00000053524	MCF2L2	0.000196799	0.002110366	-1.195073476	0.320989651	6.284940257	0.546845257	0.098859709	0.049121633	0.055691826	0.055691826	0.003092839	0.028747351
1621	ENSG00000162817	C1orf115	0.000197027	0.002111251	-0.596048201	0.160107565	10.00909584	0.137343356	0.002078544	0.036373105	0.013007258	0.036373105	0.003291332	0.029447407
1622	ENSG00000164733	CTSB	0.000197125	0.002111251	-0.55513579	0.149122891	11.27994559	0.119137888	0.001779824	0.031576631	0.010334786	0.031576631	0.003291899	0.029447407
1623	ENSG00000124508	BTN2A2	0.000197683	0.002114622	-0.479558028	0.128845584	8.790569537	0.078120535	0.00605241	0.005357296	0.018849367	0.018849367	0.001542513	0.024150465
1624	ENSG00000174437	ATP2A2	0.000197672	0.002114622	0.295216123	0.079317094	12.84524693	0.027988689	0.000194402	0.002109249	0.0092424	0.0092424	0.001163991	0.023430891
1625	ENSG00000130826	DKC1	0.000198171	0.002117234	0.483239717	0.129856479	10.71972114	0.090291433	0.002036242	0.023257816	0.011239996	0.023257816	0.003297945	0.029486307
1626	ENSG00000241935	HOGA1	0.000198101	0.002117234	-1.808017191	0.485839981	4.368323932	1.125864343	0.216285433	-0.034802315	0.137775297	0.137775297	0.001661142	0.024329495
1627	ENSG00000137171	KLC4	0.000198808	0.002120129	-0.472370027	0.126963219	8.986804789	0.074871768	0.006581654	0.003333015	0.017597834	0.017597834	0.001449717	0.024117947
1628	ENSG00000196313	POM121	0.000198774	0.002120129	0.447233528	0.120205671	11.42537371	0.077344632	0.000947893	0.020726212	0.010160054	0.020726212	0.003301424	0.029492044
1629	ENSG00000213918	DNASE1	0.000198657	0.002120129	-0.639357369	0.171837104	7.453398052	0.135846058	0.011309806	0.005206075	0.032982179	0.032982179	0.001379676	0.023761104
1630	ENSG00000134253	TRIM45	0.000199064	0.002121555	-0.552862533	0.148610902	10.33824069	0.118199334	0.006711975	0.026415825	0.012075802	0.026415825	0.003303091	0.029492044
1631	ENSG00000166262	FAM227B	0.000199395	0.002123566	-0.776143456	0.208652952	7.081449167	0.223469173	0.026318181	0.027118786	0.0389859	0.0389859	0.002544666	0.026888211
1632	ENSG00000182324	KCNJ14	0.000199497	0.002123566	0.603428014	0.162226975	8.671007629	0.14081872	0.005749396	0.033726991	0.019690122	0.033726991	0.003305583	0.029493882
1633	ENSG00000128564	VGF	0.000200419	0.002132074	1.090561154	0.293280814	8.153302192	0.460013453	0.012204297	0.116816157	0.024200979	0.116816157	0.003310878	0.029518803
1634	ENSG00000128311	TST	0.00020076	0.002134391	-0.503671402	0.135466227	10.25983216	0.098126783	0.001829792	0.025696856	0.01227566	0.025696856	0.00331283	0.029518803
1635	ENSG00000165496	RPL10L	0.00020179	0.002144038	-0.513330922	0.138112307	8.372818155	0.097864946	0.006515452	0.016999993	0.022097062	0.022097062	0.002568661	0.027011366
1636	ENSG00000100246	DNAL4	0.000202241	0.002147518	-0.640240229	0.172283574	8.304463474	0.158590221	0.00382301	0.040699435	0.022720498	0.040699435	0.003321304	0.029573395
1637	ENSG00000144485	HES6	0.000202754	0.002151647	-0.657712671	0.177015764	7.65016768	0.167377284	0.010756333	0.036245538	0.030184223	0.036245538	0.003324228	0.029582432
1638	ENSG00000169432	SCN9A	0.000203109	0.002152777	-1.344966889	0.362025311	5.340192982	0.65710724	0.110424648	0.032608428	0.086168841	0.086168841	0.002254293	0.026003706
1639	ENSG00000205363	INSYN1	0.000203053	0.002152777	-2.524637954	0.6795453	4.001621747	2.466277218	0.245083686	0.447589036	0.164108766	0.447589036	0.003325932	0.029582432
1640	ENSG00000151623	NR3C2	0.000203331	0.00215382	-1.528803531	0.411539341	7.196155193	0.904409626	0.164685673	0.08936127	0.03703355	0.08936127	0.003327512	0.029582432
1641	ENSG00000113916	BCL6	0.000204735	0.002164733	-0.649550955	0.174934892	8.048349745	0.144005632	0.020590155	0.001198218	0.025313169	0.025313169	0.001598688	0.024229408
1642	ENSG00000178927	CYBC1	0.000204644	0.002164733	-0.441729008	0.118961391	9.732942473	0.07551953	0.004211405	0.017016314	0.01397248	0.017016314	0.003334972	0.029604051
1643	ENSG00000188707	ZBED6CL	0.000204719	0.002164733	-0.67755821	0.182476751	7.229551794	0.176134203	0.013464075	0.034546756	0.036482572	0.036482572	0.003152952	0.029042863
1644	ENSG00000186469	GNG2	0.000205686	0.002173468	-0.581428812	0.156637941	8.060537719	0.130860372	0.008444251	0.028358916	0.025180412	0.028358916	0.003340871	0.029634366
1645	ENSG00000049246	PER3	0.000205992	0.002175377	-0.593618744	0.159938135	8.192002087	0.136411213	0.009142814	0.029227496	0.023808431	0.029227496	0.0033426	0.029634366
1646	ENSG00000080166	DCT	0.000207273	0.002183156	-1.446316371	0.389844483	4.793009911	0.654681374	0.115712472	-0.081797397	0.112255609	0.112255609	0.001051522	0.022700864
1647	ENSG00000110675	ELMOD1	0.000206899	0.002183156	-0.792756967	0.213655787	6.32898091	0.204416251	0.013876444	0.005970016	0.054596749	0.054596749	0.001258159	0.023761104
1648	ENSG00000127220	ABHD8	0.000207318	0.002183156	-0.643348869	0.173412767	7.008193721	0.147720315	0.004824005	0.024614726	0.040283977	0.040283977	0.002046832	0.025409899
1649	ENSG00000186141	POLR3C	0.000207357	0.002183156	0.33182101	0.089442505	10.71836686	0.039706128	0.000757276	0.007585941	0.011242667	0.011242667	0.002171587	0.025851628
1650	ENSG00000274588	DGKK	0.000207338	0.002183156	-2.768051287	0.746124913	2.801979007	2.458554115	0.548110476	-0.348208304	0.286943103	0.286943103	0.001179973	0.023471746
1651	ENSG00000168827	GFM1	0.000208393	0.002192738	0.358248811	0.096599002	11.34567247	0.047286541	0.003743824	0.007236024	0.010253227	0.010253227	0.002464836	0.026557437
1652	ENSG00000150893	FREM2	0.000208705	0.002194692	-1.343983289	0.362431664	5.756617395	0.699515377	0.12216565	0.074869416	0.070883576	0.074869416	0.003357873	0.029680241
1653	ENSG00000030582	GRN	0.000208894	0.002195347	-0.703045704	0.189601873	10.26377635	0.191420623	0.002614242	0.051309063	0.012265314	0.051309063	0.003358931	0.029680241
1654	ENSG00000196967	ZNF585A	0.000209272	0.002197992	-0.367531237	0.09913043	12.18572306	0.048728679	0.005225249	0.005030895	0.009515014	0.009515014	0.002180597	0.025851628
1655	ENSG00000132535	DLG4	0.000209928	0.002203548	-0.50358745	0.135856521	9.154996898	0.098228489	0.009552644	0.018132847	0.016635164	0.018132847	0.00336472	0.029694973
1656	ENSG00000157680	DGKI	0.000210766	0.002211005	0.800766609	0.216087577	9.362719127	0.248400758	0.007529941	0.062510821	0.015564573	0.062510821	0.003369399	0.029694973
1657	ENSG00000189184	PCDH18	0.000211078	0.002212947	-0.57321014	0.15469694	8.023156736	0.118233838	0.010306112	0.014272486	0.025590603	0.025590603	0.002154174	0.025851628
1658	ENSG00000189171	S100A13	0.000211835	0.002219541	-0.361207428	0.097505892	11.06914119	0.050550121	0.001262742	0.012998356	0.01062819	0.012998356	0.003375356	0.029699909
1659	ENSG00000177359	AC024940.1	0.000212056	0.002220521	-1.126569603	0.304132796	7.692861726	0.49174383	0.02106729	0.117677846	0.029611586	0.117677846	0.003376587	0.029699909
1660	ENSG00000141524	TMC6	0.000212677	0.002225673	-0.699478879	0.188871593	7.528816324	0.187640918	0.021629841	0.029444793	0.031878877	0.031878877	0.003164569	0.029073865
1661	ENSG00000107295	SH3GL2	0.000213173	0.002229524	-0.785568121	0.212151065	6.339884194	0.199303417	0.013182885	0.00452741	0.054329227	0.054329227	0.001229275	0.023761104
1662	ENSG00000173320	STOX2	0.000213945	0.002236251	-0.87015285	0.235052264	6.462395768	0.237398177	0.031456676	-0.018646198	0.051417674	0.051417674	0.001073575	0.022987735
1663	ENSG00000148935	GAS2	0.000214481	0.002240513	-1.443837126	0.390087172	5.831610849	0.808001295	0.048597988	0.179654014	0.068470736	0.179654014	0.003390029	0.029713212
1664	ENSG00000077942	FBLN1	0.000215327	0.002247995	-0.834141155	0.22542402	8.893856164	0.269716626	0.004292728	0.071931255	0.018172032	0.071931255	0.003394698	0.02971867
1665	ENSG00000198918	RPL39	0.000215524	0.002248701	-0.345033484	0.093250062	14.14818173	0.04614912	0.000117837	0.012925525	0.009424102	0.012925525	0.003395784	0.02971867
1666	ENSG00000158050	DUSP2	0.000215873	0.002250991	-0.993127619	0.268436237	8.980375844	0.382360356	0.003735432	0.104351588	0.017636531	0.104351588	0.003397706	0.029720522
1667	ENSG00000071127	WDR1	0.000216699	0.002256896	0.317616606	0.085872303	12.61270185	0.039112956	0.000913089	0.010147989	0.009309991	0.010147989	0.003402251	0.029730334
1668	ENSG00000185985	SLITRK2	0.000216656	0.002256896	-0.878639963	0.237549941	7.423194332	0.299318425	0.013794918	0.070850044	0.033434809	0.070850044	0.003402014	0.029730334
1669	ENSG00000148344	PTGES	0.00021689	0.002257445	-0.607053419	0.164135698	7.693957601	0.121890048	0.010813742	0.003356122	0.029597049	0.029597049	0.001388089	0.023795138
1670	ENSG00000173113	TRMT112	0.000217012	0.002257445	-0.304088679	0.082222966	12.13193885	0.034574392	0.000592467	0.007949301	0.009548457	0.009548457	0.002714643	0.027410221
1671	ENSG00000175084	DES	0.000217313	0.002259227	-2.475465352	0.669408339	2.417298156	2.188826272	0.330450712	0.107608863	0.341710574	0.341710574	0.002080795	0.025527946
1672	ENSG00000149600	COMMD7	0.000217626	0.002261127	-0.337494234	0.091273252	10.79453551	0.043501558	0.001401354	0.010262209	0.011094856	0.011094856	0.003094737	0.028749612
1673	ENSG00000138449	SLC40A1	0.000217791	0.00226149	-1.034811645	0.279873062	6.5847456	0.415245259	0.004421885	0.113071511	0.048674061	0.113071511	0.003408243	0.029759405
1674	ENSG00000160191	PDE9A	0.00021793	0.00226158	-1.873586357	0.50674855	5.929668835	1.361250663	0.062231247	0.322959893	0.065453483	0.322959893	0.003409004	0.029759405
1675	ENSG00000011451	WIZ	0.000220128	0.002280298	0.338743337	0.091683047	10.98634253	0.043559274	0.001850617	0.009568332	0.010758055	0.010758055	0.002986239	0.028441311
1676	ENSG00000175592	FOSL1	0.000220114	0.002280298	1.276706966	0.345547441	10.12485909	0.632277843	0.001917102	0.177187449	0.012650451	0.177187449	0.003420936	0.029767724
1677	ENSG00000219200	RNASEK	0.000220092	0.002280298	-0.331472831	0.089714232	11.87988899	0.042620643	0.000946331	0.011126635	0.009728649	0.011126635	0.003420814	0.029767724
1678	ENSG00000100522	GNPNAT1	0.000220394	0.002281127	0.323742158	0.087630152	11.29213745	0.040640086	0.001199243	0.010297495	0.010319322	0.010319322	0.003413066	0.029767724
1679	ENSG00000151694	ADAM17	0.0002206	0.002281127	-0.31862627	0.086250936	12.20507201	0.035546427	0.00165543	0.004706592	0.009503406	0.009503406	0.001871876	0.024859045
1680	ENSG00000163346	PBXIP1	0.000220746	0.002281127	-1.429060508	0.386858922	10.03940633	0.792255972	0.00212772	0.222362018	0.012910842	0.222362018	0.003424372	0.029767724
1681	ENSG00000177030	DEAF1	0.000220635	0.002281127	-0.497098748	0.134564241	8.579135221	0.084745782	0.006779816	0.006487224	0.020381486	0.020381486	0.001676889	0.024339499
1682	ENSG00000187608	ISG15	0.000220864	0.002281127	-0.716337356	0.193925834	10.90004122	0.199070437	0.001292718	0.055118126	0.010903105	0.055118126	0.003425018	0.029767724
1683	ENSG00000135929	CYP27A1	0.000221589	0.002287252	-1.076632899	0.291530245	5.438014201	0.429731858	0.045219103	0.057268819	0.082265722	0.082265722	0.002590859	0.027040141
1684	ENSG00000112033	PPARD	0.000222199	0.002292187	-0.352898081	0.095575698	10.35456513	0.043221627	0.00166641	0.005659228	0.012035661	0.012035661	0.00178912	0.024533325
1685	ENSG00000128973	CLN6	0.000222839	0.002297421	0.492366668	0.133374497	8.931651822	0.094073988	0.00778427	0.018898864	0.017934675	0.018898864	0.003435729	0.029815977
1686	ENSG00000126709	IFI6	0.000223449	0.002301902	-0.963769918	0.261119557	7.944807781	0.360475844	0.008879375	0.093395759	0.026479601	0.093395759	0.003439032	0.029815977
1687	ENSG00000164116	GUCY1A1	0.000223538	0.002301902	-1.182069844	0.320273565	9.259395076	0.542276923	0.013028875	0.14083386	0.016081901	0.14083386	0.003439513	0.029815977
1688	ENSG00000068654	POLR1A	0.000223698	0.002302185	0.513215885	0.139059113	7.989872658	0.086542561	0.003042748	0.006364	0.025963408	0.025963408	0.001358306	0.023761104
1689	ENSG00000138085	ATRAID	0.000224282	0.002306829	-0.439822007	0.119193994	11.51895092	0.075081669	0.000603132	0.02070768	0.010058132	0.02070768	0.003443529	0.029816791
1690	ENSG00000233369	GTF2IP4	0.00022451	0.002307803	-0.401170111	0.108726738	13.04808046	0.062467042	0.000739672	0.016992583	0.009208273	0.016992583	0.003444756	0.029816791
1691	ENSG00000064218	DMRT3	0.000225205	0.00231221	-2.072767482	0.56188953	3.0624489	1.414224137	0.218963962	-0.062320678	0.254615803	0.254615803	0.001373502	0.023761104
1692	ENSG00000157404	KIT	0.000225162	0.00231221	-2.908074683	0.788315778	2.0869192	2.939347887	0.535844279	-0.032996307	0.396318369	0.396318369	0.001810041	0.024533325
1693	ENSG00000137642	SORL1	0.000225634	0.002314914	-1.42346811	0.385926939	8.190731135	0.786605961	0.03052807	0.192881334	0.023821174	0.192881334	0.003450805	0.029822276
1694	ENSG00000162302	RPS6KA4	0.000225735	0.002314914	0.416842564	0.113016752	10.56772463	0.067454661	0.005279976	0.013879203	0.011550736	0.013879203	0.003451348	0.029822276
1695	ENSG00000105281	SLC1A5	0.00022645	0.002320877	0.401038028	0.10875547	12.27800603	0.062442753	0.000448443	0.017293186	0.009461657	0.017293186	0.003455187	0.029822276
1696	ENSG00000110492	MDK	0.000226821	0.002322378	-0.500166155	0.135652842	12.00641756	0.097131887	0.000507195	0.027095345	0.009633314	0.027095345	0.003457175	0.029822276
1697	ENSG00000274847	MAFIP	0.000226864	0.002322378	-0.946737786	0.256773387	7.556394955	0.348012817	0.023813553	0.075085306	0.031485022	0.075085306	0.003457406	0.029822276
1698	ENSG00000099284	H2AFY2	0.000227223	0.002324689	-0.322839063	0.087569702	10.9831488	0.039205414	0.000739437	0.009182933	0.010763242	0.010763242	0.002840867	0.028016523
1699	ENSG00000234475	HSPA1A	0.000228476	0.002336127	-0.377503453	0.102436243	13.28127039	0.049797441	0.0065424	0.00226358	0.009197375	0.009197375	0.001870218	0.024859045
1700	ENSG00000157168	NRG1	0.000229272	0.002342895	1.568686893	0.425768461	10.28258139	0.95576811	0.005004408	0.266913766	0.012216426	0.266913766	0.003470279	0.029888792
1701	ENSG00000139547	RDH16	0.000229802	0.002346928	-0.97657743	0.265102124	5.977426966	0.354166423	0.04138084	0.043688385	0.064037864	0.064037864	0.002636881	0.027185694
1702	ENSG00000189091	SF3B3	0.000230094	0.00234853	0.310848454	0.084390467	11.93747869	0.031463334	0.000998601	0.002095531	0.009684025	0.009684025	0.001314068	0.023761104
1703	ENSG00000106089	STX1A	0.000230641	0.002352723	0.382145792	0.103763593	10.38799587	0.056730882	0.002406999	0.013743326	0.01195493	0.013743326	0.003477558	0.029897292
1704	ENSG00000140859	KIFC3	0.000232295	0.002367582	0.622693648	0.169162932	8.701291119	0.150663531	0.005504049	0.037420098	0.019471086	0.037420098	0.003486327	0.029897292
1705	ENSG00000229117	RPL41	0.00023237	0.002367582	-0.397040856	0.107863795	15.80229149	0.06125395	4.61E-05	0.01740582	0.011150259	0.01740582	0.003486724	0.029897292
1706	ENSG00000213614	HEXA	0.00023337	0.00237638	-0.605099979	0.164435988	11.88492295	0.142290828	0.000981319	0.039577472	0.009724666	0.039577472	0.00349201	0.029898073
1707	ENSG00000087884	AAMDC	0.000233908	0.002380461	-0.497535237	0.135226831	9.065021941	0.096205949	0.004109243	0.023320201	0.017138538	0.023320201	0.003494846	0.029901047
1708	ENSG00000125850	OVOL2	0.000234085	0.002380864	-1.191333085	0.323813505	5.0275258	0.439258619	0.057132064	-0.040286735	0.100150715	0.100150715	0.001051934	0.022700864
1709	ENSG00000046774	MAGEC2	0.000234364	0.002381442	-0.346815666	0.094274967	11.17492604	0.046749655	0.000914251	0.012417403	0.010474604	0.012417403	0.003497249	0.029901047
1710	ENSG00000170854	RIOX2	0.000234415	0.002381442	0.393719125	0.107026373	10.47945142	0.060249998	0.001416686	0.015765281	0.011743432	0.015765281	0.003497521	0.029901047
1711	ENSG00000197093	GAL3ST4	0.000235107	0.002387068	-1.08780161	0.295762208	6.471936753	0.459964043	0.053032759	0.078180167	0.05119799	0.078180167	0.003501157	0.029917414
1712	ENSG00000176340	COX8A	0.000237378	0.002408719	-0.318168132	0.086564427	12.60252938	0.039361368	0.00034186	0.01089824	0.009313648	0.01089824	0.003513065	0.029966693
1713	ENSG00000248905	FMN1	0.000237687	0.002410454	-0.825708989	0.224672089	8.033649642	0.265111657	0.027933358	0.047782963	0.025474556	0.047782963	0.003514684	0.029966693
1714	ENSG00000172602	RND1	0.000238184	0.002414075	-1.274150005	0.346741299	6.72548857	0.631312904	0.042104402	0.13823989	0.045705285	0.13823989	0.003517274	0.029966693
1715	ENSG00000225210	DUXAP9	0.000238533	0.002416208	0.348508068	0.094851041	10.64492612	0.045714878	0.002105102	0.009491793	0.011389978	0.011389978	0.002878032	0.028127463
1716	ENSG00000136628	EPRS	0.000239598	0.002425582	0.309401687	0.084233813	11.84355385	0.035711304	0.00088513	0.007855473	0.009757873	0.009757873	0.002731937	0.027433069
1717	ENSG00000254726	MEX3A	0.000239897	0.002427197	0.375792839	0.102317514	10.61509873	0.048906268	0.004252	0.003923239	0.011451311	0.011451311	0.001809121	0.024533325
1718	ENSG00000135441	BLOC1S1	0.000241378	0.002440752	-0.421636939	0.11484868	10.70947429	0.069161576	0.001225065	0.018560264	0.011260246	0.018560264	0.003533887	0.030034581
1719	ENSG00000196544	BORCS6	0.000242283	0.002448478	-0.506202806	0.137919306	8.373429635	0.099578381	0.00644099	0.021941505	0.022091612	0.022091612	0.003511815	0.029966693
1720	ENSG00000135114	OASL	0.000243342	0.002456323	-1.002415152	0.273199622	9.179160652	0.391016482	0.004297233	0.107659818	0.016504267	0.107659818	0.003544043	0.030070868
1721	ENSG00000170634	ACYP2	0.000243306	0.002456323	-0.660310467	0.179960092	7.629204088	0.169665736	0.016855182	0.03172327	0.030469884	0.03172327	0.003543859	0.030070868
1722	ENSG00000130176	CNN1	0.000244139	0.002462272	1.04441139	0.284710233	7.647306593	0.424510445	0.012336012	0.109253863	0.030223035	0.109253863	0.003548153	0.030070868
1723	ENSG00000163517	HDAC11	0.000244215	0.002462272	-0.836669915	0.228084095	6.425909929	0.272431789	0.020868456	0.057165076	0.052267018	0.057165076	0.003548542	0.030070868
1724	ENSG00000104765	BNIP3L	0.000244948	0.002468237	-0.347971361	0.094880112	10.6209349	0.04396582	0.002064117	0.007486632	0.011439236	0.011439236	0.002350204	0.026185697
1725	ENSG00000213920	MDP1	0.000245224	0.002469588	-0.679978735	0.185421956	8.370729098	0.179968886	0.005640221	0.045931731	0.022115697	0.045931731	0.003553737	0.030079848
1726	ENSG00000170296	GABARAP	0.000245944	0.002475401	-0.672824217	0.183508525	12.49411174	0.176218183	0.000636289	0.049876779	0.00935631	0.049876779	0.003557433	0.030079848
1727	ENSG00000115446	UNC50	0.000246456	0.00247768	-0.367815774	0.100333964	10.53068966	0.052666818	0.001275625	0.013824732	0.011630334	0.013824732	0.003560056	0.030079848
1728	ENSG00000119782	FKBP1B	0.000246364	0.00247768	-0.945610864	0.257940022	7.751507077	0.348093637	0.010680269	0.089119313	0.028844918	0.089119313	0.003559584	0.030079848
1729	ENSG00000105612	DNASE2	0.000247096	0.002481479	-0.887270605	0.242076322	9.375613834	0.306495873	0.003346919	0.0845545	0.015502312	0.0845545	0.003563333	0.030079848
1730	ENSG00000130724	CHMP2A	0.000247119	0.002481479	-0.616902583	0.16831225	11.52660676	0.148165455	0.000643261	0.04185026	0.010050132	0.04185026	0.003563454	0.030079848
1731	ENSG00000243646	IL10RB	0.000247921	0.002488093	-0.813331639	0.221955068	10.40276364	0.257569369	0.002092978	0.0718031	0.011919876	0.0718031	0.003567554	0.030099829
1732	ENSG00000056291	NPFFR2	0.000248174	0.002489194	-1.049203224	0.286343916	5.795072015	0.373789143	0.053354649	0.001071503	0.069634608	0.069634608	0.001653274	0.024329495
1733	ENSG00000196110	ZNF699	0.000248703	0.002493062	0.820931349	0.224078308	8.907127017	0.26243179	0.021007152	0.05430948	0.018088072	0.05430948	0.003571546	0.030115937
1734	ENSG00000116209	TMEM59	0.000248975	0.002494345	-0.682072856	0.186190221	12.90871541	0.181167172	0.000687132	0.051313066	0.009229247	0.051313066	0.00357293	0.030115937
1735	ENSG00000159784	FAM131B	0.000249492	0.002498083	-0.565429512	0.154371644	9.145263529	0.124509885	0.007506899	0.028239008	0.016688391	0.028239008	0.003575563	0.030123512
1736	ENSG00000118432	CNR1	0.000250565	0.002507385	-0.97242879	0.265568922	6.488514136	0.368317548	0.03942307	0.066367208	0.050818643	0.066367208	0.003581021	0.030131763
1737	ENSG00000141696	P3H4	0.000251008	0.002509342	-0.425124681	0.116115283	9.372027121	0.070398609	0.003036114	0.017188024	0.015519575	0.017188024	0.003583268	0.030131763
1738	ENSG00000166341	DCHS1	0.00025105	0.002509342	-1.186635394	0.324112237	10.37064163	0.548489558	0.001881576	0.155691538	0.011996595	0.155691538	0.00358348	0.030131763
1739	ENSG00000015532	XYLT2	0.000251743	0.002514824	-0.365613111	0.099881188	10.00895773	0.050603667	0.001956677	0.011170552	0.013007701	0.013007701	0.003010355	0.028505193
1740	ENSG00000099814	CEP170B	0.000253262	0.002528541	0.302878445	0.082777671	12.08474723	0.030838704	0.000698978	0.003448645	0.009579237	0.009579237	0.001583939	0.024229408
1741	ENSG00000082898	XPO1	0.000253492	0.002529386	0.307971246	0.084174909	11.39252033	0.032229292	0.000430398	0.004288858	0.010197724	0.010197724	0.001670765	0.024339499
1742	ENSG00000092010	PSME1	0.000254564	0.002535719	-0.463639964	0.126759889	12.374348	0.083770288	0.000409173	0.023692931	0.009411324	0.023692931	0.003601246	0.03018816
1743	ENSG00000117318	ID3	0.000254454	0.002535719	-0.541078531	0.14792722	13.28544508	0.114088748	0.000372117	0.032451576	0.009197456	0.032451576	0.003600691	0.03018816
1744	ENSG00000167553	TUBA1C	0.000254529	0.002535719	0.495939768	0.135589398	14.53665326	0.095848258	0.000116881	0.027459846	0.009667131	0.027459846	0.00360107	0.03018816
1745	ENSG00000196683	TOMM7	0.000254784	0.002536452	-0.354897407	0.097035369	12.51278315	0.049084686	0.001538411	0.012585383	0.009348482	0.012585383	0.003602352	0.03018816
1746	ENSG00000227686	VARS	0.000255938	0.002546477	0.826227965	0.225977244	8.396136167	0.235530777	0.05470774	-0.016289012	0.021890833	0.021890833	0.001809552	0.024533325
1747	ENSG00000196482	ESRRG	0.00025609	0.002546537	-1.129924987	0.309052739	6.233196681	0.438971952	0.086261591	-0.016320581	0.057008802	0.057008802	0.001778161	0.024533325
1748	ENSG00000137414	FAM8A1	0.000256621	0.002550356	-0.519465571	0.142102868	10.82367376	0.105185214	0.001184464	0.029105374	0.011040246	0.029105374	0.003611581	0.030250906
1749	ENSG00000116750	UCHL5	0.000260625	0.002588662	0.338715434	0.092758412	10.90755426	0.043310218	0.002016117	0.009098602	0.010890068	0.010890068	0.002980579	0.028433831
1750	ENSG00000030419	IKZF2	0.000261129	0.002590773	-0.793690215	0.217384386	7.542230646	0.245690413	0.029817974	0.041065983	0.031686663	0.041065983	0.003634076	0.030381016
1751	ENSG00000153904	DDAH1	0.000261135	0.002590773	0.415208054	0.113721843	12.88022857	0.067238507	0.000276234	0.019122753	0.009234871	0.019122753	0.00363411	0.030381016
1752	ENSG00000108556	CHRNE	0.00026162	0.002594104	-1.464173271	0.401076565	4.927883154	0.695706325	0.136160472	-0.070453829	0.105133144	0.105133144	0.001356337	0.023761104
1753	ENSG00000176244	ACBD7	0.000262087	0.002597244	-0.498184394	0.136483246	8.247380696	0.09205195	0.004678564	0.017315989	0.02326295	0.02326295	0.002692742	0.027381903
1754	ENSG00000117360	PRPF3	0.000262904	0.002603859	0.372526092	0.102080103	10.51365125	0.054137124	0.000756598	0.014873923	0.011667546	0.014873923	0.003642879	0.030424825
1755	ENSG00000100802	C14orf93	0.000263347	0.002606761	-0.731076762	0.200354391	6.746982734	0.185690921	0.014944297	0.016741892	0.045268526	0.045268526	0.001891205	0.024859045
1756	ENSG00000164587	RPS14	0.000263606	0.002607835	-0.320850053	0.087936266	16.0391172	0.037118361	3.61E-05	0.007757519	0.011563032	0.011563032	0.002302318	0.026156551
1757	ENSG00000131981	LGALS3	0.000265223	0.002621275	-0.862370275	0.236454082	10.21215773	0.290197387	0.001911177	0.081954622	0.012403321	0.081954622	0.003654329	0.030424825
1758	ENSG00000142409	ZNF787	0.000265417	0.002621275	0.383576413	0.105178585	10.56996365	0.057414301	0.001449749	0.015144053	0.011545978	0.015144053	0.003655285	0.030424825
1759	ENSG00000275464	FP565260.1	0.000265367	0.002621275	0.395569397	0.108465673	9.071826082	0.050263598	0.000547641	0.003603676	0.017099562	0.017099562	0.001302298	0.023761104
1760	ENSG00000135521	LTV1	0.000265568	0.00262128	0.447810867	0.122796931	11.73986599	0.078255275	0.000640082	0.021978547	0.009845866	0.021978547	0.00365603	0.030424825
1761	ENSG00000119969	HELLS	0.000265789	0.002621972	0.446442297	0.122428825	11.88323646	0.077779798	0.008047862	0.014435364	0.009725999	0.014435364	0.003657118	0.030424825
1762	ENSG00000119922	IFIT2	0.000266159	0.002624128	-0.955751283	0.262123398	9.72677931	0.356488566	0.003076646	0.099986368	0.013995971	0.099986368	0.003658936	0.030424825
1763	ENSG00000023445	BIRC3	0.000266695	0.002624204	-1.125955154	0.30884716	8.46873501	0.494796385	0.001298658	0.141781195	0.021269495	0.141781195	0.00366157	0.030424825
1764	ENSG00000089048	ESF1	0.000266771	0.002624204	0.440586558	0.120854407	10.10339889	0.0757619	0.001521096	0.020387585	0.01271405	0.020387585	0.003661943	0.030424825
1765	ENSG00000092108	SCFD1	0.000266451	0.002624204	-0.373081965	0.102328992	11.10683722	0.054322513	0.002750693	0.012956141	0.010571924	0.012956141	0.00366037	0.030424825
1766	ENSG00000204628	RACK1	0.000266519	0.002624204	-0.352169136	0.096594766	17.06116859	0.042450757	3.38E-05	0.006520963	0.013962003	0.013962003	0.001759585	0.024533325
1767	ENSG00000112514	CUTA	0.000268308	0.002637834	-0.297453067	0.081625489	12.41100532	0.032987384	0.00060048	0.007454377	0.0093936	0.0093936	0.002788489	0.027696755
1768	ENSG00000090554	FLT3LG	0.0002692	0.002643605	-0.739647162	0.203017574	7.193860976	0.207026179	0.024752529	0.028875974	0.037071674	0.037071674	0.003042908	0.028590015
1769	ENSG00000155438	NIFK	0.000269078	0.002643605	0.366327912	0.100546081	11.22230589	0.052390259	0.001900407	0.013263864	0.010410027	0.013263864	0.003673245	0.030502684
1770	ENSG00000171243	SOSTDC1	0.000269365	0.002643735	-1.844692931	0.506351345	4.024202362	1.114370844	0.222227984	-0.105348932	0.162359543	0.162359543	0.001429292	0.024037964
1771	ENSG00000136099	PCDH8	0.000269542	0.002643972	-2.195660357	0.602716558	5.57761439	1.882198021	0.23316441	0.311736465	0.077040575	0.311736465	0.003675511	0.030504409
1772	ENSG00000131652	THOC6	0.000270534	0.002652211	-0.363644624	0.099847665	10.2701371	0.04601157	0.002705637	0.005219796	0.012248697	0.012248697	0.001921088	0.024994786
1773	ENSG00000115648	MLPH	0.000270852	0.002652425	0.771763142	0.211924353	10.37406108	0.232579821	0.002855396	0.064512501	0.011988344	0.064512501	0.003681905	0.030504409
1774	ENSG00000161996	WDR90	0.000270861	0.002652425	0.895336662	0.245857922	10.12744536	0.313023663	0.011516868	0.079152309	0.012642865	0.079152309	0.003681948	0.030504409
1775	ENSG00000101290	CDS2	0.000271419	0.002656391	-0.385760784	0.105944662	10.79205913	0.05811254	0.003576374	0.013260033	0.011099557	0.013260033	0.003684664	0.030504409
1776	ENSG00000185247	MAGEA11	0.000271595	0.002656612	-0.438717147	0.120494012	11.48233542	0.075164389	0.000742328	0.021035882	0.01009709	0.021035882	0.003685518	0.030504409
1777	ENSG00000058085	LAMC2	0.000272745	0.002666358	1.182734156	0.324935947	4.94775842	0.48734959	0.054254629	0.030359827	0.104120425	0.104120425	0.00193834	0.025035567
1778	ENSG00000173145	NOC3L	0.000273066	0.002668003	0.341871015	0.093931039	11.48257014	0.045650386	0.001604125	0.011630436	0.010096836	0.011630436	0.003692666	0.030518773
1779	ENSG00000088280	ASAP3	0.000273274	0.002668533	-0.863097495	0.237153802	9.282387726	0.290971497	0.007199105	0.077163784	0.015964206	0.077163784	0.003693674	0.030518773
1780	ENSG00000169964	TMEM42	0.000273496	0.002669198	-0.528844314	0.145319201	10.31792581	0.109244097	0.003782696	0.027893809	0.012126441	0.027893809	0.003694749	0.030518773
1781	ENSG00000007933	FMO3	0.000273851	0.002671161	-0.691888607	0.190138996	6.679746572	0.184849614	0.007580119	0.043965707	0.046649138	0.046649138	0.003444109	0.029816791
1782	ENSG00000267221	C17orf113	0.000274767	0.002678588	-0.868607659	0.238759857	7.094837302	0.294751303	0.017191379	0.068318025	0.038753068	0.068318025	0.003700898	0.030518773
1783	ENSG00000143603	KCNN3	0.000275262	0.002681288	0.736771504	0.202547026	7.570918142	0.212080032	0.013577234	0.047960713	0.031279678	0.047960713	0.003703291	0.030518773
1784	ENSG00000197355	UAP1L1	0.000275352	0.002681288	-0.364526722	0.100214948	10.75103261	0.046069641	0.003885907	0.003871244	0.011178646	0.011178646	0.001896458	0.024859045
1785	ENSG00000158055	GRHL3	0.000275548	0.002681688	-2.550940462	0.701334647	3.005359844	2.171288129	0.476408605	-0.20253491	0.261396825	0.261396825	0.001572582	0.024229408
1786	ENSG00000081307	UBA5	0.000276216	0.002686689	0.447262019	0.122987662	9.225067111	0.075656166	0.006428598	0.013125367	0.01626035	0.01626035	0.003047825	0.028598828
1787	ENSG00000196730	DAPK1	0.00027647	0.002687651	0.64766379	0.178105528	9.077007614	0.16390641	0.007435027	0.040147342	0.017069983	0.040147342	0.003709118	0.03053153
1788	ENSG00000180155	LYNX1	0.000276971	0.002691015	-2.196974174	0.604238581	2.873327971	1.667633489	0.269928337	0.004602703	0.277728058	0.277728058	0.001866964	0.024859045
1789	ENSG00000153029	MR1	0.000277448	0.002694146	-1.046547414	0.287869353	9.748347173	0.428020964	0.006005656	0.11829749	0.013914163	0.11829749	0.003713826	0.030533171
1790	ENSG00000176928	GCNT4	0.000278031	0.00269796	-0.464800401	0.127869707	8.658231431	0.074853956	0.004742176	0.007810489	0.019783817	0.019783817	0.001896002	0.024859045
1791	ENSG00000198853	RUSC2	0.000278151	0.00269796	0.557189094	0.153291161	11.35818184	0.121335722	0.002436971	0.032810299	0.010238197	0.032810299	0.003717207	0.030546505
1792	ENSG00000138380	CARF	0.000278425	0.002699103	-0.710322216	0.195434012	7.27941081	0.190422339	0.021617874	0.02720093	0.035673806	0.035673806	0.003015453	0.028505193
1793	ENSG00000120802	TMPO	0.000278625	0.002699537	0.294788543	0.081110577	12.18099912	0.029515609	0.000350507	0.003956397	0.009517882	0.009517882	0.001718977	0.024506317
1794	ENSG00000125246	CLYBL	0.000279047	0.00270212	-0.89889838	0.247356962	5.890709218	0.287831345	0.025144077	0.031638243	0.066634123	0.066634123	0.002189786	0.025851628
1795	ENSG00000231225	MICA	0.000279264	0.002702715	1.067601688	0.293796589	8.68370989	0.429326952	0.109876924	-0.000633246	0.01959773	0.01959773	0.002983684	0.028433831
1796	ENSG00000120693	SMAD9	0.000280554	0.002713688	-1.008698404	0.277677642	9.847295567	0.397767589	0.007634286	0.108023023	0.013552754	0.108023023	0.003728718	0.030583231
1797	ENSG00000166471	TMEM41B	0.000281319	0.00271957	-0.402856135	0.110920936	10.33610668	0.063452064	0.004496898	0.013958283	0.012081086	0.013958283	0.003732371	0.030598747
1798	ENSG00000168994	PXDC1	0.000281984	0.00272449	0.399741976	0.11008198	11.22785346	0.062479745	0.000895903	0.017281161	0.01040263	0.017281161	0.003735547	0.030610338
1799	ENSG00000106546	AHR	0.000282403	0.002725501	0.367278624	0.101152794	10.04943875	0.044006202	0.002468523	0.001954134	0.012879308	0.012879308	0.001429386	0.024037964
1800	ENSG00000223959	AFG3L1P	0.000282328	0.002725501	0.534772307	0.14727973	9.163485016	0.10892926	0.015947996	0.012970546	0.016588982	0.016588982	0.003191246	0.029116757
1801	ENSG00000007312	CD79B	0.000283155	0.002730693	-1.96240631	0.540571631	3.111732689	1.277856278	0.189432637	-0.036251737	0.248893895	0.248893895	0.001546831	0.024150465
1802	ENSG00000180730	SHISA2	0.000283255	0.002730693	1.376005628	0.379049114	10.39689051	0.740431324	0.00186553	0.213651817	0.011933773	0.213651817	0.003741597	0.030623694
1803	ENSG00000137801	THBS1	0.000283546	0.002731978	0.90842072	0.25026146	9.873951259	0.322725419	0.001426202	0.092519996	0.013459142	0.092519996	0.003742979	0.030623694
1804	ENSG00000171763	SPATA5L1	0.000283833	0.002733229	0.470199943	0.129545035	9.336621752	0.086464695	0.003971905	0.021200969	0.015692253	0.021200969	0.003744344	0.030623694
1805	ENSG00000144730	IL17RD	0.00028418	0.002735052	-1.700078273	0.468430147	8.678408283	1.130392003	0.019398527	0.309741676	0.0196362	0.309741676	0.003745991	0.030623694
1806	ENSG00000116754	SRSF11	0.000284786	0.002739369	0.317082654	0.087380443	11.6749783	0.036441217	0.001548564	0.006299929	0.009904449	0.009904449	0.002415429	0.026379038
1807	ENSG00000163428	LRRC58	0.000285098	0.002740856	0.292383595	0.080580255	12.45301851	0.02870806	0.000365518	0.003461494	0.009374249	0.009374249	0.00164021	0.024329495
1808	ENSG00000102349	KLF8	0.000285472	0.002742927	-0.835721043	0.230344274	7.365899122	0.27319908	0.027848125	0.051739602	0.034310341	0.051739602	0.003752117	0.030658328
1809	ENSG00000105516	DBP	0.00028633	0.002749657	-1.362605158	0.375646181	8.39586993	0.726339909	0.012946948	0.198718132	0.021893169	0.198718132	0.003756181	0.030658328
1810	ENSG00000100116	GCAT	0.000288052	0.00276226	-0.425341607	0.117309265	9.020391844	0.0576318	0.003244162	0.000952282	0.017398034	0.017398034	0.00129668	0.023761104
1811	ENSG00000129518	EAPP	0.00028812	0.00276226	-0.486501015	0.134179273	10.54050084	0.092609864	0.000914768	0.026091348	0.011609079	0.026091348	0.003764628	0.030689407
1812	ENSG00000185133	INPP5J	0.000287895	0.00276226	-0.93694842	0.258400397	6.466364953	0.301196869	0.048829986	-0.001536029	0.051326162	0.051326162	0.001825323	0.02463831
1813	ENSG00000231500	RPS18	0.000288501	0.002764388	-0.408990441	0.112812117	17.00150566	0.065453843	1.73E-05	0.019072594	0.013790773	0.019072594	0.003766424	0.030689639
1814	ENSG00000281244	ADAMTS13	0.000289735	0.002774687	-1.657297334	0.457272664	7.497762961	1.074908284	0.049144202	0.264503232	0.032328506	0.264503232	0.003772231	0.030709779
1815	ENSG00000058799	YIPF1	0.000290379	0.002779315	-0.443058481	0.122265678	9.710496442	0.076828921	0.001807894	0.02061545	0.01405848	0.02061545	0.003775252	0.030709779
1816	ENSG00000154654	NCAM2	0.000290566	0.002779576	-1.787992494	0.493434117	4.077503597	1.067799571	0.206916218	-0.071010688	0.158299624	0.158299624	0.001609626	0.024229408
1817	ENSG00000123453	SARDH	0.000290978	0.002781983	-1.308897734	0.36125435	6.148697308	0.67056963	0.031984847	0.163772211	0.059232733	0.163772211	0.003778063	0.030709779
1818	ENSG00000114547	ROPN1B	0.000291669	0.002787063	-1.546977939	0.427036592	4.931168011	0.936774524	0.064199233	0.209341144	0.104965128	0.209341144	0.003781304	0.030709779
1819	ENSG00000040275	SPDL1	0.00029284	0.002796707	0.50776175	0.140205522	10.59171769	0.100935704	0.001083185	0.028403198	0.01150006	0.028403198	0.003786778	0.030709779
1820	ENSG00000125637	PSD4	0.000293544	0.00279955	-0.600155698	0.165746207	8.342164466	0.117407083	0.018834564	-0.007145784	0.022373144	0.022373144	0.001444962	0.024067004
1821	ENSG00000143882	ATP6V1C2	0.000293337	0.00279955	-1.702583061	0.470182052	4.114266099	1.033163648	0.176051587	0.028357069	0.155555156	0.155555156	0.002226316	0.02590459
1822	ENSG00000180801	ARSJ	0.000293621	0.00279955	-0.348460027	0.096236705	10.53468108	0.037835388	0.002270583	-0.000510495	0.011621672	0.011621672	0.001190715	0.023508736
1823	ENSG00000146409	SLC18B1	0.000294434	0.002805764	-0.585330964	0.161687005	9.839320765	0.134154926	0.002248562	0.03696547	0.013581063	0.03696547	0.003794217	0.030709779
1824	ENSG00000114956	DGUOK	0.000294634	0.002806123	-0.333539744	0.092138732	10.64025443	0.038152335	0.001334796	0.004637337	0.011399523	0.011399523	0.001834875	0.024690511
1825	ENSG00000196812	ZSCAN16	0.000294795	0.002806123	-0.529174929	0.146187717	8.118057427	0.095135984	0.007489597	0.006420594	0.024566676	0.024566676	0.001753524	0.024533325
1826	ENSG00000185475	TMEM179B	0.000295401	0.002810351	-0.426801114	0.117923655	10.22085805	0.071334943	0.001937529	0.018921454	0.012379656	0.018921454	0.003798717	0.030709779
1827	ENSG00000132768	DPH2	0.000295761	0.002810698	0.388695934	0.107404682	10.70928221	0.059168278	0.002921949	0.014381699	0.011260626	0.014381699	0.003800391	0.030709779
1828	ENSG00000160818	GPATCH4	0.000295602	0.002810698	0.542318787	0.149848098	9.997665004	0.115178243	0.002885693	0.030795985	0.013044071	0.030795985	0.003799655	0.030709779
1829	ENSG00000214194	SMIM30	0.000296345	0.002814712	-0.306644852	0.084744244	11.52605071	0.033529491	0.000721669	0.005928545	0.010050711	0.010050711	0.002238044	0.025921629
1830	ENSG00000165891	E2F7	0.000297331	0.002822536	0.413289444	0.114243656	10.0289609	0.058123815	0.006633546	0.001968161	0.012943873	0.012943873	0.001772169	0.024533325
1831	ENSG00000120949	TNFRSF8	0.000297935	0.002826721	0.419772014	0.116052444	10.39274417	0.069024367	0.001334257	0.018867997	0.011943619	0.018867997	0.003810477	0.030770456
1832	ENSG00000197728	RPS26	0.000298268	0.002828338	0.294907301	0.081538196	14.56878316	0.034023155	0.000281364	0.009633711	0.009691352	0.009691352	0.003780702	0.030709779
1833	ENSG00000101199	ARFGAP1	0.000299368	0.002834126	0.536909267	0.148487856	11.40666749	0.11293984	0.002078463	0.030994502	0.010181378	0.030994502	0.003817103	0.030770456
1834	ENSG00000176749	CDK5R1	0.000299208	0.002834126	0.718896745	0.198810778	6.409838172	0.159974742	0.00664273	-0.000479001	0.052645858	0.052645858	0.001168343	0.023467504
1835	ENSG00000183955	KMT5A	0.000299157	0.002834126	0.36443963	0.100784493	10.91833076	0.048276331	0.004364765	0.006174558	0.010871506	0.010871506	0.002483551	0.026625322
1836	ENSG00000100433	KCNK10	0.000299752	0.002836218	-1.563434009	0.43242372	6.776844876	0.957686099	0.096067552	0.184417858	0.044668762	0.184417858	0.003818877	0.030770456
1837	ENSG00000153187	HNRNPU	0.000301062	0.002847059	0.426028811	0.117870361	15.46679597	0.071122271	0.000412319	0.020427814	0.010644183	0.020427814	0.003824915	0.03079074
1838	ENSG00000151726	ACSL1	0.000301505	0.0028497	-0.457327167	0.126543095	10.65240636	0.081960227	0.004670936	0.019348796	0.01137474	0.019348796	0.003826955	0.030792894
1839	ENSG00000103024	NME3	0.000302248	0.002855168	-0.798439151	0.220968276	8.958629812	0.249843898	0.00496409	0.068276379	0.017768525	0.068276379	0.003830371	0.030806111
1840	ENSG00000080546	SESN1	0.000302718	0.002858052	-0.668706102	0.185085236	7.182743475	0.152611157	0.014127876	0.008948127	0.037256941	0.037256941	0.001807945	0.024533325
1841	ENSG00000182054	IDH2	0.000303159	0.002860662	-0.460837624	0.127564486	12.38151649	0.083238632	0.00039153	0.024017517	0.009407796	0.024017517	0.003834553	0.030825473
1842	ENSG00000111335	OAS2	0.000304392	0.002870738	-1.004166348	0.278044331	7.394803214	0.335560039	0.082097086	-0.040778309	0.033865889	0.033865889	0.001608547	0.024229408
1843	ENSG00000151576	QTRT2	0.000304794	0.002872969	0.581914411	0.161141962	9.076633156	0.132747393	0.005684282	0.033265816	0.017072118	0.033265816	0.003842043	0.030857126
1844	ENSG00000204394	VARS	0.000305381	0.00287694	0.319353812	0.088446702	11.19621167	0.03532298	0.001288947	0.004619706	0.010445281	0.010445281	0.001947913	0.025056446
1845	ENSG00000146070	PLA2G7	0.000306317	0.002884193	-1.995220456	0.552708189	4.749460763	1.56085501	0.104880634	0.353348879	0.114651147	0.353348879	0.003849	0.030885867
1846	ENSG00000111678	C12orf57	0.000306889	0.002888011	-0.703564056	0.194924689	12.16466677	0.194095475	0.00059272	0.056400731	0.0095279	0.056400731	0.003851607	0.030891094
1847	ENSG00000164951	PDP1	0.000307485	0.002892056	-0.846548326	0.234571676	11.00145136	0.281021866	0.000973674	0.081562132	0.010733696	0.081562132	0.003854324	0.03089862
1848	ENSG00000172380	GNG12	0.00030877	0.002901005	0.305021798	0.084544425	13.62873668	0.036488801	9.98E-05	0.010621867	0.009237291	0.010621867	0.00386017	0.030916953
1849	ENSG00000261787	TCF24	0.00030861	0.002901005	-0.912134375	0.252811398	5.980539326	0.290696092	0.031923608	0.019450587	0.063946796	0.063946796	0.002041102	0.025409899
1850	ENSG00000136040	PLXNC1	0.000308958	0.002901197	-0.880673765	0.244111432	5.549289718	0.24626347	0.011316189	0.005668294	0.078069398	0.078069398	0.001315535	0.023761104
1851	ENSG00000169245	CXCL10	0.000309388	0.002903669	-2.809663994	0.778880694	5.444565936	3.096249691	0.105204368	0.804778336	0.082011626	0.804778336	0.003862975	0.030921072
1852	ENSG00000282458	WASH5P	0.000309668	0.002904724	0.563538723	0.156231481	9.643926053	0.124562698	0.00671596	0.029896454	0.014320917	0.029896454	0.003864244	0.030921072
1853	ENSG00000109083	IFT20	0.000309958	0.002905874	-0.355094289	0.098450453	10.14727643	0.047910829	0.001953486	0.010650567	0.012585251	0.012585251	0.003204115	0.02916948
1854	ENSG00000185269	NOTUM	0.000310864	0.002912801	-1.4455329	0.400860549	6.029732912	0.819696626	0.023086572	0.217947198	0.062526282	0.217947198	0.003869666	0.030950201
1855	ENSG00000141968	VAV1	0.000314068	0.002941233	-1.200190855	0.33307073	5.710147048	0.513453342	0.093977475	0.00766742	0.072426692	0.072426692	0.002270236	0.026097888
1856	ENSG00000169020	ATP5ME	0.000316192	0.002959534	-0.306828928	0.085190989	11.59138673	0.036952203	0.000691359	0.010194898	0.009984386	0.010194898	0.003893679	0.031064551
1857	ENSG00000078900	TP73	0.000316682	0.002962521	-1.156759594	0.321209934	6.621643428	0.525238813	0.026476782	0.12828695	0.047877004	0.12828695	0.003895875	0.031064551
1858	ENSG00000244257	PKD1P1	0.000317827	0.002971632	0.569045024	0.158054059	10.3939192	0.127120975	0.009152947	0.028318681	0.011940826	0.028318681	0.003901003	0.031072086
1859	ENSG00000239713	APOBEC3G	0.000319754	0.002988041	-0.737821472	0.205021771	8.635829268	0.213754869	0.006383141	0.056667748	0.019949983	0.056667748	0.003909612	0.03109885
1860	ENSG00000099910	KLHL22	0.000321653	0.003004174	-0.570782543	0.158673845	8.097471851	0.12795068	0.008627999	0.029138084	0.024783906	0.029138084	0.00391807	0.031135433
1861	ENSG00000132256	TRIM5	0.000322208	0.003007736	-0.618386865	0.171928961	9.0544429	0.150192176	0.00243861	0.041900742	0.017199442	0.041900742	0.003920534	0.031135433
1862	ENSG00000169758	TMEM266	0.000322988	0.003013395	-2.047263082	0.56929634	5.01744696	1.646303826	0.067350052	0.418797432	0.100643228	0.418797432	0.003923996	0.031135433
1863	ENSG00000112473	SLC39A7	0.000324002	0.003021237	-0.286408814	0.079661724	12.997083	0.032224191	0.000254641	0.009264344	0.00921469	0.009264344	0.003928493	0.031135433
1864	ENSG00000090581	GNPTG	0.000324448	0.00302215	-0.583604247	0.162339803	7.679214603	0.118961093	0.009738019	0.011240628	0.029793298	0.029793298	0.002068785	0.025452498
1865	ENSG00000172465	TCEAL1	0.00032443	0.00302215	-0.532757357	0.148195237	8.428574277	0.111503314	0.005619102	0.027323641	0.021609347	0.027323641	0.003930385	0.031135433
1866	ENSG00000116132	PRRX1	0.000324665	0.003022555	-0.874863954	0.243370631	7.451009012	0.300691198	0.010225353	0.078618543	0.033017757	0.078618543	0.003931429	0.031135433
1867	ENSG00000026297	RNASET2	0.00032512	0.003025167	-0.687887646	0.191376754	7.826004838	0.170843455	0.027033507	0.009074782	0.027904086	0.027904086	0.00244907	0.026557437
1868	ENSG00000189139	FSCB	0.000325726	0.00302918	-1.912850668	0.532244645	3.768547477	1.434894742	0.241700851	0.179793447	0.183225693	0.183225693	0.003891221	0.031064551
1869	ENSG00000125459	MSTO1	0.000326092	0.003030966	0.502459404	0.139819134	10.00917101	0.099198904	0.003161801	0.026162284	0.013007016	0.026162284	0.003937735	0.03114495
1870	ENSG00000117151	CTBS	0.000326304	0.003031308	-0.444421448	0.123674744	9.832767094	0.077607658	0.002528615	0.020414549	0.013604431	0.020414549	0.003938668	0.03114495
1871	ENSG00000197587	DMBX1	0.000326558	0.003032046	-1.3267212	0.369224211	7.657581475	0.691648564	0.01229976	0.192190017	0.030083906	0.192190017	0.003939788	0.03114495
1872	ENSG00000147649	MTDH	0.000326737	0.003032093	0.338317086	0.09415681	10.42276678	0.043603995	0.00142529	0.010157786	0.011872968	0.011872968	0.003286798	0.029432089
1873	ENSG00000149972	CNTN5	0.000326972	0.003032651	-2.915525854	0.811460379	3.763863071	3.107678381	0.804071456	-0.107082607	0.183630463	0.183630463	0.002620014	0.027156897
1874	ENSG00000119772	DNMT3A	0.000328255	0.003041302	-0.433549474	0.120701427	9.251015926	0.066729532	0.005728098	0.007196888	0.016125154	0.016125154	0.002251853	0.025995652
1875	ENSG00000214063	TSPAN4	0.000328249	0.003041302	-0.365101955	0.101645318	10.87389907	0.045806761	0.00454856	0.002722602	0.010949096	0.010949096	0.001918686	0.024994786
1876	ENSG00000130935	NOL11	0.000328683	0.003042029	0.356633854	0.099297296	10.31813419	0.041470284	0.002664011	0.001478454	0.012125918	0.012125918	0.00151044	0.024150465
1877	ENSG00000181218	HIST3H2A	0.000328511	0.003042029	0.725330153	0.201945423	10.42188661	0.206769494	0.001546272	0.059626658	0.011875018	0.059626658	0.003948389	0.031177918
1878	ENSG00000121413	ZSCAN18	0.000330078	0.003053312	-0.486667376	0.135544079	10.77926229	0.093100177	0.002740487	0.024817809	0.011124	0.024817809	0.003955274	0.031203917
1879	ENSG00000155158	TTC39B	0.000331691	0.003066597	-0.60353906	0.168154078	7.629876839	0.124459653	0.01195302	0.007024272	0.030460671	0.030460671	0.001873697	0.024859045
1880	ENSG00000181350	LRRC75A	0.000333109	0.003078065	-0.703914066	0.196180684	7.251637622	0.177322387	0.02160802	0.014234334	0.036122271	0.036122271	0.002355353	0.026185697
1881	ENSG00000139597	N4BP2L1	0.000334512	0.003089387	-1.151557086	0.321036776	7.634339654	0.521502651	0.026783887	0.127813031	0.030399631	0.127813031	0.003974652	0.031314132
1882	ENSG00000136450	SRSF1	0.000334938	0.003091681	0.336684859	0.093871365	13.83473505	0.044581208	0.000126194	0.013091556	0.009292925	0.013091556	0.003976509	0.031314557
1883	ENSG00000066248	NGEF	0.00033667	0.003106014	-2.21730185	0.618439641	2.727085524	1.717234872	0.276780546	0.026102734	0.296920839	0.296920839	0.002092712	0.02560183
1884	ENSG00000106789	CORO2A	0.000337735	0.003114192	-0.696482393	0.19430437	9.628117385	0.190831343	0.002766049	0.053865233	0.014384907	0.053865233	0.003988658	0.031330815
1885	ENSG00000116833	NR5A2	0.000338142	0.003114639	-1.825881572	0.509428291	5.10111297	1.311573675	0.075173844	0.314101932	0.096638062	0.314101932	0.003990419	0.031330815
1886	ENSG00000167978	SRRM2	0.000338322	0.003114639	0.572959209	0.159864114	9.906697603	0.129152519	0.00423663	0.034098172	0.013346221	0.034098172	0.003991198	0.031330815
1887	ENSG00000204967	PCDHA4	0.000338158	0.003114639	-0.845407825	0.235873011	8.668991908	0.28117761	0.010555304	0.072898812	0.019704853	0.072898812	0.00399049	0.031330815
1888	ENSG00000283154	IQCJ-SCHIP1	0.000339054	0.003119727	0.478777596	0.133607089	9.80053252	0.090189421	0.002445306	0.024330975	0.013720768	0.024330975	0.003994367	0.031338411
1889	ENSG00000162191	UBXN1	0.000340311	0.003129634	-0.447524258	0.124919251	11.7922612	0.078809172	0.000528391	0.022878838	0.009800546	0.022878838	0.003999798	0.031355814
1890	ENSG00000132000	PODNL1	0.000341507	0.003136994	-1.982676101	0.553573938	3.568136642	1.38036849	0.258356314	-0.007022397	0.201309843	0.201309843	0.002157426	0.025851628
1891	ENSG00000143971	ETAA1	0.000341436	0.003136994	-0.328414878	0.091693845	10.70502399	0.041256602	0.001342573	0.009782054	0.011269068	0.011269068	0.003393574	0.02971867
1892	ENSG00000167969	ECI1	0.000341653	0.003136994	-0.468047445	0.130685469	10.45582812	0.086214953	0.001894666	0.023723372	0.011796826	0.023723372	0.004005585	0.031387017
1893	ENSG00000182583	VCX	0.000342854	0.003146356	-1.934905728	0.540391355	3.660969289	1.256949948	0.245299154	-0.078059286	0.192735071	0.192735071	0.00174731	0.024533325
1894	ENSG00000236609	ZNF853	0.00034351	0.003150712	-0.763110161	0.213155429	8.166201697	0.229223419	0.008266457	0.059886398	0.024069091	0.059886398	0.004013572	0.031404572
1895	ENSG00000164659	KIAA1324L	0.0003455	0.003167296	-0.579773624	0.162013361	8.301754621	0.132339231	0.0074261	0.031946394	0.022745789	0.031946394	0.004022109	0.031445578
1896	ENSG00000133119	RFC3	0.000346338	0.003173307	0.315768717	0.08825481	10.99655501	0.034060287	0.00094181	0.004242343	0.010741557	0.010741557	0.001898768	0.024859045
1897	ENSG00000111801	BTN3A3	0.000347351	0.003180907	-0.600390107	0.167839999	7.634609039	0.111992204	0.011859448	-0.007044798	0.03039595	0.03039595	0.001265339	0.023761104
1898	ENSG00000142534	RPS11	0.000347724	0.003182648	-0.337202014	0.094272756	15.61954322	0.044776382	4.15E-05	0.013289496	0.010863586	0.013289496	0.004031618	0.031479274
1899	ENSG00000100906	NFKBIA	0.000349531	0.003197501	-0.443746126	0.124106705	12.21759374	0.077556156	0.000381581	0.02272213	0.009496014	0.02272213	0.00403932	0.031479274
1900	ENSG00000131094	C1QL1	0.000349951	0.003197978	-0.677493485	0.189497717	7.15755294	0.156491002	0.016184109	0.007305611	0.037679968	0.037679968	0.001888535	0.024859045
1901	ENSG00000197763	TXNRD3	0.000349907	0.003197978	-0.850909046	0.238000563	9.530799582	0.285186983	0.011743956	0.073222446	0.014793662	0.073222446	0.004040921	0.031479274
1902	ENSG00000063180	CA11	0.000350413	0.00319883	-2.20479309	0.616749175	4.076591893	1.914789225	0.344017302	0.226552016	0.15836826	0.226552016	0.004043071	0.031479274
1903	ENSG00000119285	HEATR1	0.000350252	0.00319883	0.330075767	0.09232936	10.38815754	0.033355091	0.000832522	5.09E-06	0.011954544	0.011954544	0.001199808	0.023604835
1904	ENSG00000179163	FUCA1	0.000351296	0.003205209	-0.946330737	0.264766919	10.77591521	0.352784385	0.001157408	0.103994874	0.011130435	0.103994874	0.004046824	0.031479274
1905	ENSG00000018236	CNTN1	0.000351872	0.003207251	-2.012315016	0.56307831	3.072598434	1.351917793	0.222158259	-0.050790414	0.253427516	0.253427516	0.001719618	0.024506317
1906	ENSG00000124496	TRERF1	0.000352074	0.003207251	0.331979644	0.092897186	10.53299091	0.036258569	0.001319493	0.002674787	0.011625337	0.011625337	0.001612318	0.024229408
1907	ENSG00000276920	NKD2	0.000351893	0.003207251	-2.419702973	0.677075112	7.283142009	2.306605592	0.027876973	0.659769088	0.035613949	0.659769088	0.004049358	0.031479274
1908	ENSG00000244038	DDOST	0.00035356	0.003219046	-0.31439088	0.088002503	13.69459227	0.038945816	0.000101251	0.01151541	0.00925247	0.01151541	0.004056417	0.031479274
1909	ENSG00000256235	SMIM3	0.000353739	0.003219046	-0.605121591	0.169388488	10.62032067	0.144282594	0.001711682	0.041327008	0.011440505	0.041327008	0.004057177	0.031479274
1910	ENSG00000100196	KDELR3	0.000354815	0.003225457	-0.559850651	0.156750921	9.329696105	0.123514847	0.004105161	0.032751116	0.015726517	0.032751116	0.004061725	0.031479274
1911	ENSG00000187626	ZKSCAN4	0.000354722	0.003225457	-0.440552434	0.123346598	9.121732103	0.076483194	0.003608441	0.019213133	0.016818281	0.019213133	0.004061332	0.031479274
1912	ENSG00000105278	ZFR2	0.000355156	0.003226869	-0.909677512	0.254715846	7.086897599	0.326110147	0.017888257	0.079431987	0.038890985	0.079431987	0.004063165	0.031479274
1913	ENSG00000102882	MAPK3	0.000355532	0.003228596	-0.622171468	0.17422573	9.37500614	0.152554727	0.006623472	0.038908435	0.015505234	0.038908435	0.004064751	0.031479274
1914	ENSG00000130810	PPAN	0.000356679	0.003235905	0.401075348	0.112339063	10.38221618	0.063402509	0.00258162	0.016348477	0.011968749	0.016348477	0.004069587	0.031479274
1915	ENSG00000140443	IGF1R	0.000356896	0.003235905	0.541765076	0.15175226	8.287106407	0.111558529	0.011659796	0.017722342	0.022883327	0.022883327	0.003303679	0.029492044
1916	ENSG00000171236	LRG1	0.000356755	0.003235905	-2.216768241	0.620914564	6.458065806	1.936860305	0.06698796	0.511314384	0.051517701	0.511314384	0.004069905	0.031479274
1917	ENSG00000169891	REPS2	0.000357245	0.00323738	-1.248023585	0.349605376	8.197516655	0.613937564	0.032079256	0.151256622	0.023753258	0.151256622	0.004071968	0.031479274
1918	ENSG00000141750	STAC2	0.000357479	0.003237812	-1.727352544	0.483901726	3.96429791	0.998168273	0.184202448	-0.055397161	0.167038872	0.167038872	0.001745278	0.024533325
1919	ENSG00000095777	MYO3A	0.00035793	0.003240208	-0.775298377	0.217212719	8.836414487	0.23694391	0.027786103	0.042985945	0.018543391	0.042985945	0.00407485	0.031479274
1920	ENSG00000165821	SALL2	0.000358359	0.0032424	-1.012928107	0.28381358	9.270946152	0.404467182	0.006409033	0.11441619	0.016022592	0.11441619	0.004076652	0.031479274
1921	ENSG00000158473	CD1D	0.000358804	0.003244739	-1.498559342	0.419921482	8.090556319	0.885304892	0.009774608	0.254726469	0.024857486	0.254726469	0.004078523	0.031479274
1922	ENSG00000167302	TEPSIN	0.000359201	0.003246638	0.556891684	0.156063065	8.288296073	0.12226532	0.006713327	0.029820193	0.022872107	0.029820193	0.004080188	0.031479274
1923	ENSG00000070214	SLC44A1	0.000360451	0.003254556	-0.468146318	0.131226593	11.95778733	0.086412795	0.000707473	0.025123156	0.009668781	0.025123156	0.00408543	0.031479274
1924	ENSG00000157227	MMP14	0.000360639	0.003254556	-0.332925521	0.093326281	11.29217026	0.043703574	0.000542443	0.012522249	0.010319281	0.012522249	0.004086217	0.031479274
1925	ENSG00000172053	QARS	0.000360562	0.003254556	-0.492541765	0.138068019	12.04793581	0.09565455	0.001429984	0.027164183	0.009604184	0.027164183	0.004085893	0.031479274
1926	ENSG00000198576	ARC	0.000361846	0.003263751	0.961589311	0.269620634	5.864606143	0.305800754	0.041604479	-0.006098788	0.06743845	0.06743845	0.001666583	0.024329495
1927	ENSG00000241697	TMEFF1	0.000363381	0.003275893	-0.567647395	0.159212559	9.532883215	0.127085436	0.020223881	0.017799077	0.014784635	0.017799077	0.004097676	0.031535268
1928	ENSG00000273622	CDC42EP5	0.000363684	0.003276928	-1.71650267	0.481470651	6.858849524	1.16209121	0.227288428	0.120432554	0.043062676	0.120432554	0.004098941	0.031535268
1929	ENSG00000132109	TRIM21	0.000365049	0.003287524	-0.586209876	0.16447436	8.821510509	0.135554784	0.004685372	0.035892351	0.018641909	0.035892351	0.004104628	0.031551147
1930	ENSG00000095794	CREM	0.000366519	0.003299054	-0.420417945	0.117992618	9.227384822	0.067297038	0.00463519	0.013204389	0.016248197	0.016248197	0.003354285	0.029680241
1931	ENSG00000135519	KCNH3	0.000368572	0.003315808	-1.614892109	0.453414868	3.239135133	0.874724624	0.073725376	0.041726708	0.234652187	0.234652187	0.001785476	0.024533325
1932	ENSG00000125356	NDUFA1	0.000369659	0.003323867	-0.307604753	0.086385246	11.23342511	0.03178686	0.000798383	0.003452436	0.010395234	0.010395234	0.001799833	0.024533325
1933	ENSG00000110315	RNF141	0.00037077	0.003332134	-0.430280588	0.120863294	9.280952102	0.069104742	0.005940391	0.011012517	0.015971512	0.015971512	0.00301756	0.028505193
1934	ENSG00000165240	ATP7A	0.000372981	0.003350274	-0.561575481	0.157812492	8.986258356	0.124495845	0.003077794	0.03427938	0.017601117	0.03427938	0.004137452	0.031721333
1935	ENSG00000089876	DHX32	0.000373583	0.003351912	-0.328164304	0.09223087	11.02614246	0.040647096	0.002065269	0.008359172	0.010694531	0.010694531	0.003210393	0.029184173
1936	ENSG00000108001	EBF3	0.000373784	0.003351912	-0.400789227	0.112646627	9.721087647	0.052184644	0.005016146	-2.23E-05	0.014017747	0.014017747	0.001563748	0.024229408
1937	ENSG00000121753	ADGRB2	0.000373935	0.003351912	-0.413344289	0.116178859	10.2051445	0.067453083	0.003987643	0.016258648	0.012422519	0.016258648	0.004141376	0.031721333
1938	ENSG00000196159	FAT4	0.000373566	0.003351912	-0.861139945	0.242023295	8.856965165	0.292758932	0.018886766	0.068976147	0.018409026	0.068976147	0.004139856	0.031721333
1939	ENSG00000133106	EPSTI1	0.000374369	0.003354065	-1.682202623	0.472857864	4.017068918	0.987809686	0.172481596	0.001103387	0.162910243	0.162910243	0.002156984	0.025851628
1940	ENSG00000188051	TMEM221	0.00037483	0.003356467	-2.27632384	0.639920263	2.984947887	1.776459226	0.350385069	-0.07292987	0.263861845	0.263861845	0.001983132	0.025260397
1941	ENSG00000099194	SCD	0.000375621	0.00336101	-0.893392347	0.251189622	14.80663299	0.315160437	8.14E-05	0.094562943	0.009890943	0.094562943	0.004148295	0.031730023
1942	ENSG00000143153	ATP1B1	0.000375751	0.00336101	0.298013414	0.083792737	11.95515463	0.035069066	0.000562333	0.009969501	0.009670743	0.009969501	0.004148828	0.031730023
1943	ENSG00000157851	DPYSL5	0.000375918	0.00336101	-0.972576025	0.273469167	7.592619066	0.311786497	0.081202577	-0.046183502	0.0309755	0.0309755	0.001666596	0.024329495
1944	ENSG00000110700	RPS13	0.000377376	0.003368849	-0.285253035	0.080230483	14.34380035	0.029394866	0.000120288	0.006109809	0.009535107	0.009535107	0.002557719	0.026945236
1945	ENSG00000150995	ITPR1	0.000377288	0.003368849	-0.652492247	0.183517277	9.227124518	0.168138149	0.011544178	0.038973708	0.016249561	0.038973708	0.004155122	0.031752726
1946	ENSG00000168255	POLR2J3	0.00037737	0.003368849	-0.342875739	0.096437375	11.10091955	0.046197418	0.003369609	0.010290748	0.010580642	0.010580642	0.004035703	0.031479274
1947	ENSG00000022267	FHL1	0.000378505	0.003375456	-0.411416134	0.115740773	9.949478398	0.066854083	0.005815983	0.014277907	0.013202055	0.014277907	0.004160097	0.031752726
1948	ENSG00000156931	VPS8	0.000378321	0.003375456	-0.557405961	0.156805397	9.102176055	0.122715941	0.00698548	0.029896418	0.016927551	0.029896418	0.004159343	0.031752726
1949	ENSG00000148288	GBGT1	0.000378889	0.003377144	-0.473128138	0.133111749	9.015766439	0.079114757	0.009152791	0.005796816	0.017425316	0.017425316	0.002297856	0.026156551
1950	ENSG00000136110	CNMD	0.00037961	0.003381841	-2.231628919	0.627943744	5.943145288	1.967226305	0.05832243	0.533147589	0.06505053	0.533147589	0.004164607	0.031759245
1951	ENSG00000134987	WDR36	0.000381159	0.003392161	0.329228234	0.09266735	12.31830878	0.040956057	0.003440919	0.007107441	0.009439937	0.009439937	0.003244023	0.029280044
1952	ENSG00000177606	JUN	0.0003811	0.003392161	0.798169842	0.224657014	12.51667712	0.251687458	0.000383236	0.075322925	0.009346874	0.075322925	0.004170676	0.031791567
1953	ENSG00000206299	TAP2	0.000381372	0.00339232	0.477241612	0.134334003	10.59698303	0.084150425	0.015579408	0.004198789	0.011489028	0.011489028	0.002878807	0.028127463
1954	ENSG00000107902	LHPP	0.000381585	0.003392472	-0.840398254	0.236565111	6.078129382	0.2401943	0.02278185	0.012610066	0.061162728	0.061162728	0.001923329	0.024994786
1955	ENSG00000196776	CD47	0.000382071	0.003395055	-0.38867174	0.109418171	11.6685204	0.05968652	0.001028466	0.016930038	0.009910436	0.016930038	0.004174624	0.031807702
1956	ENSG00000165516	KLHDC2	0.000383317	0.003402646	-0.465088542	0.130962482	10.20841703	0.085473612	0.00099354	0.024733218	0.012413547	0.024733218	0.004179684	0.031818346
1957	ENSG00000204387	C6orf48	0.000383275	0.003402646	-0.356309547	0.100331022	12.26465246	0.049684596	0.005630406	0.008866654	0.009469065	0.009469065	0.003951876	0.031191269
1958	ENSG00000104213	PDGFRL	0.000383832	0.003405479	-1.112949726	0.313422399	5.313676554	0.467308063	0.060087225	0.059551445	0.087263175	0.087263175	0.003221946	0.029191808
1959	ENSG00000146278	PNRC1	0.000384473	0.003409426	-0.870558361	0.245191894	10.77715167	0.299504436	0.00164382	0.088534778	0.011128055	0.088534778	0.004184372	0.031840081
1960	ENSG00000179603	GRM8	0.000385791	0.003419371	-1.490256303	0.419835755	4.516478583	0.744465776	0.136084823	-0.038326546	0.128308269	0.128308269	0.001810484	0.024533325
1961	ENSG00000158164	TMSB15A	0.000386316	0.003422278	-0.572649861	0.161343478	9.309859201	0.129616421	0.003379365	0.035668212	0.015825458	0.035668212	0.004191829	0.031868909
1962	ENSG00000175938	ORAI3	0.00039074	0.003459698	-1.496919536	0.422112103	7.9065328	0.886044782	0.014667148	0.252600793	0.026928411	0.252600793	0.004209651	0.031962438
1963	ENSG00000247596	TWF2	0.00039517	0.003497141	-0.358167307	0.101083294	11.88185119	0.050746545	0.002300945	0.013025804	0.009727095	0.013025804	0.004227396	0.031994864
1964	ENSG00000149571	KIRREL3	0.000395613	0.003499283	0.578153109	0.163182118	7.857783678	0.114309367	0.012428657	0.005110171	0.027513949	0.027513949	0.001996896	0.025321223
1965	ENSG00000172531	PPP1CA	0.00039765	0.003515507	-0.286788832	0.080976309	12.12625936	0.031500774	0.000283654	0.008249376	0.00955209	0.00955209	0.003524784	0.029986558
1966	ENSG00000166012	TAF1D	0.000398795	0.003523837	0.390690422	0.110337095	11.39714728	0.060400831	0.001426574	0.016834838	0.010192357	0.016834838	0.004241841	0.032024886
1967	ENSG00000114416	FXR1	0.00039941	0.003527481	-0.293384426	0.08286588	12.00866974	0.030389293	0.000668424	0.005040284	0.009631707	0.009631707	0.002323463	0.026156551
1968	ENSG00000129657	SEC14L1	0.000400488	0.003533281	0.39997301	0.112994324	9.446880608	0.060615596	0.00398381	0.011793781	0.015167765	0.015167765	0.00332913	0.029582432
1969	ENSG00000141179	PCTP	0.000400677	0.003533281	-0.502070455	0.141842341	9.421456691	0.099765522	0.003557189	0.026621685	0.015285284	0.026621685	0.004249315	0.032046437
1970	ENSG00000180901	KCTD2	0.000400362	0.003533281	-0.504455275	0.142507729	9.318059629	0.100712681	0.001629805	0.028832874	0.015784429	0.028832874	0.004248065	0.032046437
1971	ENSG00000089225	TBX5	0.000403375	0.003554482	-0.464394179	0.131263929	9.800015208	0.075046317	0.012122674	0.000811989	0.013722655	0.013722655	0.002176971	0.025851628
1972	ENSG00000163531	NFASC	0.000403491	0.003554482	0.404855567	0.114437416	10.37906179	0.059771868	0.007667569	0.005581755	0.011976315	0.011976315	0.002731432	0.027433069
1973	ENSG00000064393	HIPK2	0.000404419	0.003559055	0.316270532	0.089413111	11.02034655	0.03960176	0.001044361	0.010947695	0.010703654	0.010947695	0.00426412	0.032109356
1974	ENSG00000242498	ARPIN	0.000404336	0.003559055	-0.483391721	0.136657983	9.284691445	0.092510752	0.005362063	0.022651043	0.015952493	0.022651043	0.004263791	0.032109356
1975	ENSG00000069535	MAOB	0.000406305	0.003573712	-1.625806616	0.459792881	3.395655542	1.046665537	0.053999517	0.263114723	0.218194998	0.263114723	0.004271552	0.032129681
1976	ENSG00000137413	TAF8	0.000406496	0.003573712	-0.368405762	0.104192162	10.02718457	0.052287424	0.003334499	0.011128729	0.012949511	0.012949511	0.003657085	0.030424825
1977	ENSG00000057149	SERPINB3	0.000406791	0.003574493	-2.135812019	0.604080996	3.579104782	1.806404514	0.276375591	0.270995184	0.200278484	0.270995184	0.004273465	0.032129681
1978	ENSG00000143570	SLC39A1	0.000407138	0.003575737	-0.394879417	0.111692587	13.02952146	0.061749207	0.000430984	0.018281867	0.009210441	0.018281867	0.004274832	0.032129681
1979	ENSG00000145428	RNF175	0.000408605	0.003586803	-0.9544048	0.270028243	5.586381225	0.319507883	0.032647604	0.025154055	0.076725274	0.076725274	0.002268908	0.026097888
1980	ENSG00000011465	DCN	0.0004089	0.003587578	-2.516405351	0.712000985	2.515369143	2.176485894	0.433522467	-0.087526058	0.326895637	0.326895637	0.002066446	0.025452065
1981	ENSG00000152661	GJA1	0.000409992	0.003591716	0.415822534	0.117677827	12.11281448	0.068490199	0.000471512	0.020300595	0.009560768	0.020300595	0.004286033	0.032129681
1982	ENSG00000166501	PRKCB	0.000409786	0.003591716	-1.12471488	0.318282523	5.728414335	0.501059586	0.024901118	0.127054528	0.071815624	0.127054528	0.004285229	0.032129681
1983	ENSG00000166548	TK2	0.00040978	0.003591716	-0.539320763	0.152621953	8.300648763	0.115212219	0.007177682	0.027762509	0.022756127	0.027762509	0.004285205	0.032129681
1984	ENSG00000164136	IL15	0.000410829	0.003597237	-0.682131766	0.193072839	7.225189345	0.160712691	0.019361558	0.007040401	0.036554123	0.036554123	0.002116168	0.025740299
1985	ENSG00000115539	PDCL3	0.000411628	0.003602423	0.395308557	0.111905729	9.103818778	0.061251033	0.001866013	0.016096957	0.016918325	0.016918325	0.004037998	0.031479274
1986	ENSG00000171298	GAA	0.000413237	0.003614682	-1.042278853	0.295139185	7.443722649	0.430432129	0.013096261	0.117564447	0.033126503	0.117564447	0.004298728	0.032202456
1987	ENSG00000179041	RRS1	0.000414841	0.003625058	0.458575761	0.129891294	10.51434717	0.083333617	0.00158309	0.023724532	0.011666019	0.023724532	0.00430498	0.032221507
1988	ENSG00000204257	HLA-DMA	0.000414706	0.003625058	-1.701696734	0.481992818	6.210731076	1.147512024	0.210964572	0.137511043	0.057591066	0.137511043	0.004304457	0.032221507
1989	ENSG00000085840	ORC1	0.000415563	0.003629544	0.291959017	0.082707989	11.87531277	0.028431097	0.000528633	0.003045213	0.009732284	0.009732284	0.00182109	0.024618149
1990	ENSG00000151849	CENPJ	0.000416177	0.003631539	0.364120577	0.103161788	10.46259148	0.049235962	0.004182077	0.007643953	0.011781455	0.011781455	0.003021163	0.028505557
1991	ENSG00000182700	IGIP	0.00041621	0.003631539	-0.901857352	0.2555136	7.751833128	0.322348645	0.009641025	0.088289775	0.02884072	0.088289775	0.004310308	0.032233606
1992	ENSG00000230034	PSMB8	0.000417159	0.003637995	-1.039063101	0.294436933	7.682352104	0.351271313	0.100288249	-0.066068656	0.029751412	0.029751412	0.001644075	0.024329495
1993	ENSG00000174332	GLIS1	0.000418377	0.003646786	0.385850632	0.109361522	9.541479014	0.05231078	0.003192389	0.00636582	0.014747525	0.014747525	0.002304225	0.026156551
1994	ENSG00000182013	PNMA8A	0.000418986	0.003650259	-0.940494209	0.266593048	9.558642031	0.350645031	0.02802811	0.07857967	0.014674051	0.07857967	0.004321084	0.032244793
1995	ENSG00000196628	TCF4	0.00041943	0.003652298	-0.422739182	0.119839428	9.613040899	0.07068624	0.007095685	0.014246459	0.014446548	0.014446548	0.004266961	0.03211683
1996	ENSG00000048540	LMO3	0.000419977	0.003655227	-1.014780876	0.287701399	5.504747647	0.329494049	0.044439045	-0.018739068	0.079719098	0.079719098	0.001541752	0.024150465
1997	ENSG00000214174	AMZ2P1	0.000421486	0.003666528	-0.572027415	0.162219676	8.259798441	0.107103372	0.016329593	-0.005156139	0.023143242	0.023143242	0.001692031	0.024418719
1998	ENSG00000113070	HBEGF	0.000423096	0.003678688	1.441088766	0.408791414	8.763450215	0.823553553	0.002880365	0.247785265	0.01903453	0.247785265	0.004336974	0.032326642
1999	ENSG00000123595	RAB9A	0.00042577	0.003700086	-0.461212276	0.13089335	8.610763656	0.070438162	0.005560812	0.002718105	0.020138791	0.020138791	0.001782538	0.024533325
[truncated: 15,373 more rows]
